# Supplementary material for: Visible-light enabled room-temperature dealkylative imidation of secondary and tertiary amines promoted by aerobic ruthenium catalysis
Source: Royal Society of Chemistry journal article supplement (doi:10.1039/d0ra10517a), 2021-01-01

Electronic Supplementary Information (ESI) for:

**Visible-light-enabled room-temperature dealkylative imidation of  
secondary and tertiary amine promoted by aerobic ruthenium  
catalysis**

*Dong Yang,<sup>†</sup> Jingqi Shi,<sup>†</sup> Jiaming Chen,<sup>†</sup> Xiaoqi Jia,<sup>†</sup> Cuiying Shi,<sup>†</sup> Lifang Ma<sup>†</sup>  
and Ziyuan Li<sup>\*†</sup>*

<sup>†</sup> Department of Pharmaceutical and Biological Engineering, School of Chemical Engineering, Sichuan University, No.24 South Section 1, Yihuan Road, Chengdu 610065, China

**Table of Contents**

|                                                                                          |         |
|------------------------------------------------------------------------------------------|---------|
| General Remarks                                                                          | S2      |
| Experimental Procedure and Characterization Data                                         | S3-S13  |
| Control Experiments                                                                      | S14-S18 |
| References                                                                               | S19     |
| <sup>1</sup> H NMR and <sup>13</sup> C NMR Spectra of Products <b>4a-q</b> , <b>5a-c</b> | S20–S59 |

## General Remarks

All commercially available compounds were purchased from Sigma-Aldrich, TCI, Acros, J&K Chemicals and Adamas-beta. Unless otherwise noted, materials obtained from commercial suppliers were used without further purification. All anhydrous solvents, including ethyl acetate (EtOAc) (99.8%, SafeDry, water < 50 ppm), 1,4-dioxane (99.7%, SafeDry, water < 50 ppm), acetonitrile (MeCN) (99.9%, SafeDry, water < 50 ppm), 1,2-dichloroethane (DCE) (99.5%, SafeDry, water < 50 ppm) and THF (99.8%, SafeDry, water < 50 ppm), were purchased from Adamas-beta. Ru(bpy)<sub>3</sub>Cl<sub>2</sub> (98% purity, CAS No. 14323-06-9) were purchased from Adamas-beta. Except for tosyl azide (TsN<sub>3</sub>, **3a**, 98%+ purity, in 75% EtOAc solution, CAS No. 941-55-9) that was purchased from Adamas-beta, all other sulfonyl azides **3** were prepared through condensation reactions between sodium azide and corresponding sulfonyl chlorides according to literature reported methods.<sup>[1-3]</sup> All visible-light induced reactions were performed on Titan Scientific Lab PR-6 parallel photoreactor purchased from Shanghai Titan Scientific Co., Ltd.<sup>[4]</sup> Products were purified by flash chromatography on silica gel using petroleum ether, ethyl acetate and dichloromethane as the eluents. <sup>1</sup>H-NMR spectra were recorded on Bruker AVANCE III-400 and JNM-ECZ400S/L1 spectrometers. Chemical shifts (in ppm) were referenced with TMS in CDCl<sub>3</sub> (0 ppm); s = singlet, d = doublet, t = triplet, q = quartet, p = pentad, se = sextet, h = heptet, o = octet. <sup>13</sup>C-NMR spectra were obtained by using the same NMR spectrometers and were calibrated with CDCl<sub>3</sub> (δ = 77.00 ppm) or DMSO-*d*<sub>6</sub> (δ = 39.50 ppm). High resolution mass spectra were obtained from an Agilent 6520B Q-TOF mass spectrometer with electron spray ionization (ESI) as the ion source.

## Experimental Procedure and Characterization Data

### 1) Visible-light-enabled imidation of tertiary amines with azides promoted by aerobic ruthenium catalysis (Table 2)

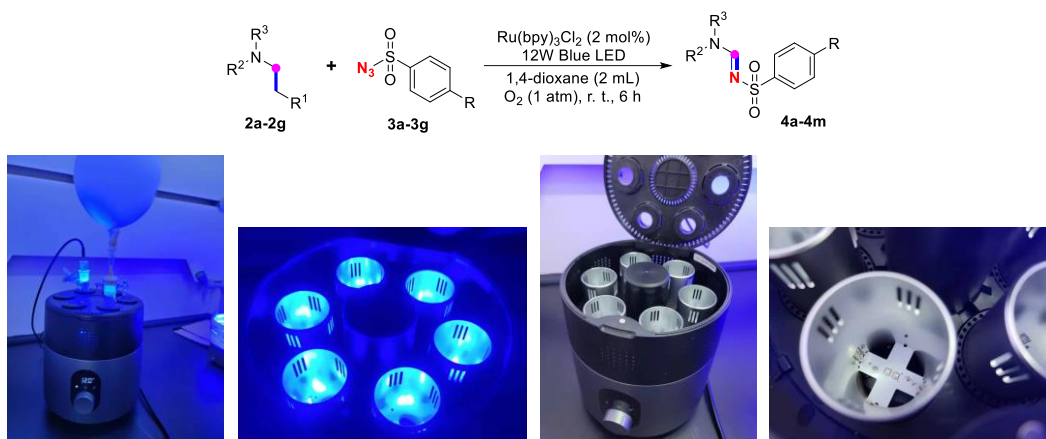

**Typical Procedure:** To a reaction tube charged with  $\text{Ru}(\text{bpy})_3\text{Cl}_2$  (6.4 mg, 0.01 mmol) was added a solution of sulfonyl azide (**3**, 1.5 mmol) in anhydrous 1,4-dioxane (1 mL) via a syringe under  $\text{O}_2$  (1 atm). Then a solution of tertiary amine (**2a-2g**, 0.5 mmol) in anhydrous 1,4-dioxane (1 mL) was added via a syringe upon blue LED (12W) irradiation using Titan Scientific Lab PR-6 parallel photoreactor (460-465 nm blue LED irradiation module from the bottom and side of the reaction mixture in a Shlenk tube with a diameter of 2 cm) with temperature-controlling module as shown in the above images (the distance between the bottom of the reaction mixture and the light source is approximately 1.5 cm, and the distance between the side of the reaction mixture and the light source is approximately 1 cm). The reaction mixture was stirred at 25 °C in  $\text{O}_2$  under blue LED (12W) irradiation for 6 hours, followed by concentration *in vacuo* to give dark residue, which was then purified by flash chromatography using petroleum ether and ethyl acetate as the eluent on silical gel to afford iminated product **4a-4m**. The yields of **4** from tertiary amines were calculated based on the loading of **2a-2g**: acquisition of 0.5 mmol of **4a-4m** from **2a-2g** is equivalent to 100% yield.

### 2) Visible-light-enabled imidation of secondary amines with azides promoted by aerobic ruthenium catalysis (Table 3)

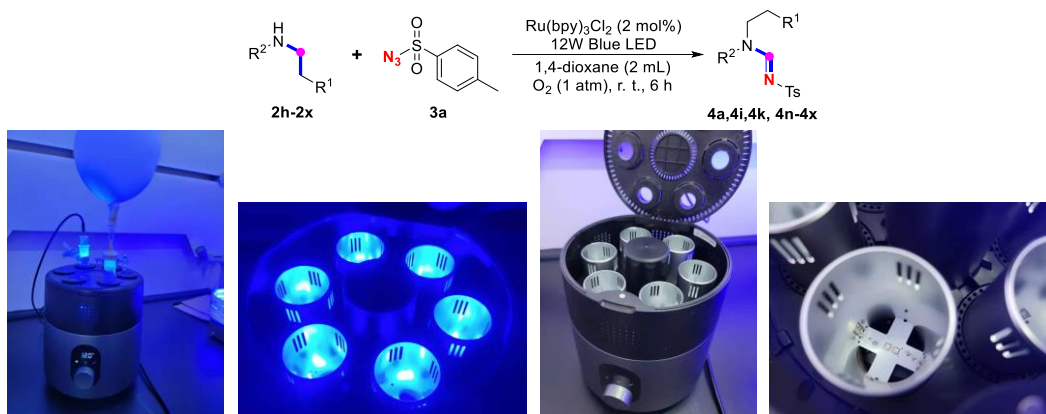

**Typical Procedure:** To a reaction tube charged with Ru(bpy)<sub>3</sub>Cl<sub>2</sub> (6.4 mg, 0.01 mmol) was added a solution of sulfonyl azide (**3**, 1.5 mmol) in anhydrous 1,4-dioxane (1 mL) via a syringe under O<sub>2</sub> (1 atm). Then a solution of secondary amine (**2h-2x**, 0.5 mmol) in anhydrous 1,4-dioxane (1 mL) was added via a syringe upon blue LED (12W) irradiation using Titan Scientific Lab PR-6 parallel photoreactor (460-465 nm blue LED irradiation module from the bottom and side of the reaction mixture in a Shlenk tube with a diameter of 2 cm) with temperature-controlling module as shown in the above images (the distance between the bottom of the reaction mixture and the light source is approximately 1.5 cm, and the distance between the side of the reaction mixture and the light source is approximately 1 cm). The reaction mixture was stirred at 25 °C in O<sub>2</sub> under blue LED (12W) irradiation for 6 hours, followed by concentration *in vacuo* to give dark residue, which was then purified by flash chromatography using petroleum ether and ethyl acetate as the eluent on silical gel to afford iminated product **4a**, **4i**, **4k** and **4n-4x**. The yields of **4** from secondary amines were calculated based on the loading of **2h-2x**: acquisition of 0.25 mmol of **4a**, **4i**, **4k** and **4n-4x** from **2h-2x** is equivalent to 100% yield.

### 3) Characterization of the imidated product 4

#### **(E)-N,N-Diethyl-N'-tosylformimidamide (4a)**<sup>[2]</sup>

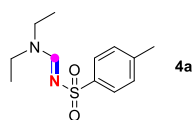

**From tertiary amine:** The reaction of 0.5 mmol of triethylamine (TEA, 50.6 mg, **2a**) and tosyl azide (**3a**, 438 µL of 75% solution in EtOAc, 1.5 mmol) with Ru(bpy)<sub>3</sub>Cl<sub>2</sub> (6.4 mg, 0.01 mmol) at 25 °C in O<sub>2</sub> under blue LED (12W) irradiation afforded 115.6 mg of **4a** (91%) after flash chromatography on silica gel using petroleum ether and ethyl acetate (4:1 to 3:1, *v/v*) as the eluent.

**From secondary amine:** The reaction of 0.5 mmol of diethylamine (DEA, 36.6 mg, **2h**) and tosyl azide

(**3a**, 438  $\mu$ L of 75% solution in EtOAc, 1.5 mmol) with Ru(bpy)<sub>3</sub>Cl<sub>2</sub> (6.4 mg, 0.01 mmol) at 25 °C in O<sub>2</sub> under blue LED (12W) irradiation afforded 58.6 mg of **4a** (92%) after flash chromatography on silica gel using petroleum ether and ethyl acetate (4:1 to 3:1, v/v) as the eluent.

Colourless oil. <sup>1</sup>H NMR (CDCl<sub>3</sub>, 400 MHz):  $\delta$  = 8.14 (s, 1H), 7.76 (d,  $J$  = 8.2 Hz, 2H), 7.25 (d,  $J$  = 8.2 Hz, 2H), 3.47 (q,  $J$  = 7.2 Hz, 2H), 3.37 (q,  $J$  = 7.2 Hz, 2H), 2.39 (s, 3H), 1.25 (t,  $J$  = 7.2 Hz, 3H), 1.14 (t,  $J$  = 7.2 Hz, 3H) ppm. <sup>13</sup>C NMR (CDCl<sub>3</sub>, 100 MHz):  $\delta$  = 158.00, 142.17, 139.74, 129.19, 126.27, 46.96, 40.83, 21.36, 14.41, 11.99 ppm. HRMS  $m/z$  (ESI) calcd for [C<sub>12</sub>H<sub>18</sub>N<sub>2</sub>O<sub>2</sub>S+H]<sup>+</sup> 255.1162, found 255.1167.

**(*E*)-*N,N*-Diethyl-*N'*-(phenylsulfonyl)formimidamide (**4b**)** <sup>[3]</sup>

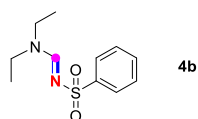

**From tertiary amine:** The reaction of 0.5 mmol of triethylamine (TEA, 50.6 mg, **2a**) and benzenesulfonyl azide (**3b**, 274.5 mg, 1.5 mmol) with Ru(bpy)<sub>3</sub>Cl<sub>2</sub> (6.4 mg, 0.01 mmol) at 25 °C in O<sub>2</sub> under blue LED (12W) irradiation afforded 96.6 mg of **4b** (80%) after flash chromatography on silica gel using petroleum ether and ethyl acetate (4:1 to 3:1, v/v) as the eluent.

Colourless oil. <sup>1</sup>H NMR (CDCl<sub>3</sub>, 400 MHz):  $\delta$  = 8.16 (s, 1H), 7.90-7.87 (m, 2H), 7.50-7.46 (m, 3H), 3.48 (q,  $J$  = 7.2 Hz, 2H), 3.38 (q,  $J$  = 7.2 Hz, 2H), 1.26 (t,  $J$  = 7.2 Hz, 3H), 1.15 (t,  $J$  = 7.2 Hz, 3H) ppm. <sup>13</sup>C NMR (CDCl<sub>3</sub>, 100 MHz):  $\delta$  = 158.15, 142.64, 131.67, 128.64, 126.32, 47.07, 40.96, 14.47, 12.05 ppm. HRMS  $m/z$  (ESI) calcd for [C<sub>11</sub>H<sub>16</sub>N<sub>2</sub>O<sub>2</sub>S+H]<sup>+</sup> 241.1005, found 241.1002; calcd for [C<sub>11</sub>H<sub>16</sub>N<sub>2</sub>O<sub>2</sub>S+Na]<sup>+</sup> 263.0825, found 263.0827.

**(*E*)-*N,N*-Diethyl-*N'*-((4-(*tert*-butyl)phenyl)sulfonyl)formimidamide (**4c**)** <sup>[3]</sup>

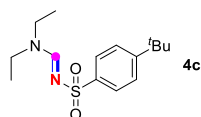

**From tertiary amine:** The reaction of 0.5 mmol of triethylamine (TEA, 50.6 mg, **2a**) and 4-(*tert*-butyl)benzenesulfonyl azide (**3c**, 358.6 mg, 1.5 mmol) with Ru(bpy)<sub>3</sub>Cl<sub>2</sub> (6.4 mg, 0.01 mmol) at 25 °C in O<sub>2</sub> under blue LED (12W) irradiation afforded 127.2 mg of **4c** (86%) after flash chromatography on silica gel using petroleum ether and ethyl acetate (4:1 to 3:1, v/v) as the eluent.

Colourless oil. <sup>1</sup>H NMR (CDCl<sub>3</sub>, 400 MHz):  $\delta$  = 8.16 (s, 1H), 7.80 (d,  $J$  = 8.6 Hz, 2H), 7.47 (d,  $J$  = 8.6 Hz, 2H), 3.48 (q,  $J$  = 7.2 Hz, 2H), 3.38 (q,  $J$  = 7.2 Hz, 2H), 1.33 (s, 9H), 1.26 (t,  $J$  = 7.2 Hz, 3H), 1.16 (t,  $J$  = 7.2 Hz,

3H) ppm.  $^{13}\text{C}$  NMR ( $\text{CDCl}_3$ , 100 MHz):  $\delta$  = 158.11, 155.24, 139.65, 126.12, 125.60, 46.97, 40.87, 34.96, 31.09, 14.45, 12.06 ppm. HRMS  $m/z$  (ESI) calcd for  $[\text{C}_{15}\text{H}_{24}\text{N}_2\text{O}_2\text{S}+\text{H}]^+$  297.1631, found 297.1634; calcd for  $[\text{C}_{11}\text{H}_{16}\text{N}_2\text{O}_2\text{S}+\text{Na}]^+$  319.1451, found 319.1452.

**(E)-N,N-Diethyl-N'-((4-methoxyphenyl)sulfonyl)formimidamide (4d)** <sup>[3]</sup>

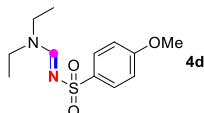

**From tertiary amine:** The reaction of 0.5 mmol of triethylamine (TEA, 50.6 mg, **2a**) and 4-methoxybenzenesulfonyl azide (**3d**, 319.5 mg, 1.5 mmol) with  $\text{Ru}(\text{bpy})_3\text{Cl}_2$  (6.4 mg, 0.01 mmol) at 25 °C in  $\text{O}_2$  under blue LED (12W) irradiation afforded 90.5 mg of **4d** (67%) after flash chromatography on silica gel using petroleum ether and ethyl acetate (4:1 to 3:1, v/v) as the eluent.

White solid, m.p. 72.5-73.4 °C.  $^1\text{H}$  NMR ( $\text{CDCl}_3$ , 400 MHz):  $\delta$  = 8.13 (s, 1H), 7.81 (d,  $J$  = 9.0 Hz, 2H), 6.93 (d,  $J$  = 9.0 Hz, 2H), 3.84 (s, 3H), 3.46 (q,  $J$  = 7.2 Hz, 2H), 3.37 (q,  $J$  = 7.2 Hz, 2H), 1.25 (t,  $J$  = 7.2 Hz, 3H), 1.13 (t,  $J$  = 7.2 Hz, 3H) ppm.  $^{13}\text{C}$  NMR ( $\text{CDCl}_3$ , 100 MHz):  $\delta$  = 162.04, 157.80, 134.52, 128.20, 113.71, 55.40, 46.90, 40.75, 14.37, 11.94 ppm. HRMS  $m/z$  (ESI) calcd for  $[\text{C}_{12}\text{H}_{18}\text{N}_2\text{O}_3\text{S}+\text{H}]^+$  271.1111, found 271.1113.

**(E)-N,N-Diethyl-N'-((4-fluorophenyl)sulfonyl)formimidamide (4e)** <sup>[3]</sup>

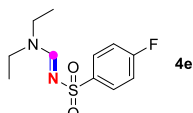

**From tertiary amine:** The reaction of 0.5 mmol of triethylamine (TEA, 50.6 mg, **2a**) and 4-fluorobenzenesulfonyl azide (**3e**, 301.5 mg, 1.5 mmol) with  $\text{Ru}(\text{bpy})_3\text{Cl}_2$  (6.4 mg, 0.01 mmol) at 25 °C in  $\text{O}_2$  under blue LED (12W) irradiation afforded 124.9 mg of **4e** (97%) after flash chromatography on silica gel using petroleum ether and ethyl acetate (4:1 to 3:1, v/v) as the eluent.

Colourless oil.  $^1\text{H}$  NMR ( $\text{CDCl}_3$ , 400 MHz):  $\delta$  = 8.15 (s, 1H), 7.88 (dd,  $J$  = 8.8 Hz, 3.6 Hz, 2H), 7.16-7.11 (m, 2H), 3.48 (q,  $J$  = 7.2 Hz, 2H), 3.40 (q,  $J$  = 7.2 Hz, 2H), 1.27 (t,  $J$  = 7.2 Hz, 3H), 1.14 (t,  $J$  = 7.2 Hz, 3H) ppm.  $^{13}\text{C}$  NMR ( $\text{CDCl}_3$ , 100 MHz):  $\delta$  = 164.47 (d,  $J$  = 251.4 Hz), 158.06, 138.68 (d,  $J$  = 3.1 Hz), 128.87 (d,  $J$  = 9.0 Hz), 115.73 (d,  $J$  = 22.2 Hz), 47.12, 40.97, 14.38, 11.98 ppm. HRMS  $m/z$  (ESI) calcd for  $[\text{C}_{11}\text{H}_{15}\text{FN}_2\text{O}_2\text{S}+\text{H}]^+$  259.0911, found 259.0910; calcd for  $[\text{C}_{11}\text{H}_{15}\text{FN}_2\text{O}_2\text{S}+\text{Na}]^+$  281.0731, found 281.0731.

**(E)-N,N-Diethyl-N'-((4-chlorophenyl)sulfonyl)formimidamide (4f)**

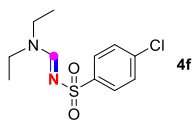

**From tertiary amine:** The reaction of 0.5 mmol of triethylamine (TEA, 50.6 mg, **2a**) and 4-chlorobenzenesulfonyl azide (**3f**, 325.5 mg, 1.5 mmol) with Ru(bpy)<sub>3</sub>Cl<sub>2</sub> (6.4 mg, 0.01 mmol) at 25 °C in O<sub>2</sub> under blue LED (12W) irradiation afforded 112.6 mg of **4f** (82%) after flash chromatography on silica gel using petroleum ether and ethyl acetate (4:1 to 3:1, v/v) as the eluent.

Colourless oil. <sup>1</sup>H NMR (CDCl<sub>3</sub>, 400 MHz): δ = 8.14 (s, 1H), 7.82 (d, *J* = 8.7 Hz, 2H), 7.43 (d, *J* = 8.7 Hz, 2H), 3.48 (q, *J* = 7.2 Hz, 2H), 3.40 (q, *J* = 7.2 Hz, 2H), 1.27 (t, *J* = 7.2 Hz, 3H), 1.14 (t, *J* = 7.2 Hz, 3H) ppm. <sup>13</sup>C NMR (CDCl<sub>3</sub>, 100 MHz): δ = 158.08, 141.19, 137.93, 128.85, 127.80, 47.12, 40.99, 14.39, 11.99 ppm. HRMS *m/z* (ESI) calcd for [C<sub>11</sub>H<sub>15</sub>ClN<sub>2</sub>O<sub>2</sub>S+H]<sup>+</sup> 275.0616, found 275.0619.

**(*E*)-*N,N*-Diethyl-*N'*-((4-(trifluoromethyl)phenyl)sulfonyl)formimidamide (**4g**)**

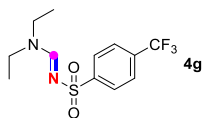

**From tertiary amine:** The reaction of 0.5 mmol of triethylamine (TEA, 50.6 mg, **2a**) and 4-(trifluoromethyl)benzenesulfonyl azide (**3g**, 376.5 mg, 1.5 mmol) with Ru(bpy)<sub>3</sub>Cl<sub>2</sub> (6.4 mg, 0.01 mmol) at 25 °C in O<sub>2</sub> under blue LED (12W) irradiation afforded 138.4 mg of **4g** (90%) after flash chromatography on silica gel using petroleum ether and ethyl acetate (4:1 to 3:1, v/v) as the eluent.

Colourless oil. <sup>1</sup>H NMR (CDCl<sub>3</sub>, 400 MHz): δ = 8.16 (s, 1H), 8.01 (d, *J* = 8.3 Hz, 2H), 7.73 (d, *J* = 8.3 Hz, 2H), 3.50 (q, *J* = 7.2 Hz, 2H), 3.41 (q, *J* = 7.2 Hz, 2H), 1.28 (t, *J* = 7.2 Hz, 3H), 1.16 (t, *J* = 7.2 Hz, 3H) ppm. <sup>13</sup>C NMR (CDCl<sub>3</sub>, 100 MHz): δ = 158.27, 146.12, 133.41 (q, *J* = 32.6 Hz), 126.87, 125.80 (q, *J* = 3.7 Hz), 123.40 (q, *J* = 271.2 Hz), 47.25, 41.13, 14.40, 12.02 ppm. HRMS *m/z* (ESI) calcd for [C<sub>12</sub>H<sub>15</sub>F<sub>3</sub>N<sub>2</sub>O<sub>2</sub>S+H]<sup>+</sup> 309.0879, found 309.0879; calcd for [C<sub>12</sub>H<sub>15</sub>F<sub>3</sub>N<sub>2</sub>O<sub>2</sub>S+Na]<sup>+</sup> 331.0699, found 331.0705.

**(*E*)-*N,N*-Diisopropyl-*N'*-tosylformimidamide (**4h**)<sup>[3]</sup>**

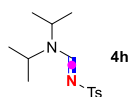

**From tertiary amine:** The reaction of 0.5 mmol of diisopropyl ethanamine (DIPEA, 64.6 mg, **2b**) and tosyl azide (**3a**, 438 μL of 75% solution in EtOAc, 1.5 mmol) with Ru(bpy)<sub>3</sub>Cl<sub>2</sub> (6.4 mg, 0.01 mmol) at 25 °C in O<sub>2</sub> under blue LED (12W) irradiation afforded 125.9 mg of **4h** (89%) after flash chromatography on

silica gel using petroleum ether and ethyl acetate (6:1, v/v) as the eluent.

White solid, m.p. 82.5-84.0 °C. **<sup>1</sup>H NMR (CDCl<sub>3</sub>, 400 MHz):** δ = 8.25 (s, 1H), 7.75 (d, *J* = 8.2 Hz, 2H), 7.25 (d, *J* = 8.2 Hz, 1H), 4.52 (p, *J* = 6.8 Hz, 1H), 3.68 (p, *J* = 6.8 Hz, 1H), 2.39 (s, 3H), 1.31 (d, *J* = 6.8 Hz, 6H), 1.21 (d, *J* = 6.8 Hz, 6H) ppm. **<sup>13</sup>C NMR (CDCl<sub>3</sub>, 100 MHz):** δ = 156.26, 142.01, 139.91, 129.16, 126.17, 48.46, 47.83, 23.49, 21.34, 19.51 ppm. **HRMS *m/z* (ESI)** calcd for [C<sub>14</sub>H<sub>22</sub>N<sub>2</sub>O<sub>2</sub>S+H]<sup>+</sup> 283.1475, found 283.1477.

**(*E*)-*N,N*-Dipropyl-*N'*-tosylformimidamide (**4i**)** <sup>[3]</sup>

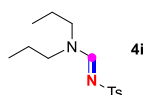

**From tertiary amine:** The reaction of 0.5 mmol of tripropylamine (71.6 mg, **2c**) and tosyl azide (**3a**, 438 μL of 75% solution in EtOAc, 1.5 mmol) with Ru(bpy)<sub>3</sub>Cl<sub>2</sub> (6.4 mg, 0.01 mmol) at 25 °C in O<sub>2</sub> under blue LED (12W) irradiation afforded 120.4 mg of **4i** (85%) after flash chromatography on silica gel using petroleum ether and ethyl acetate (4:1 to 3:1, v/v) as the eluent.

**From secondary amine:** The reaction of 0.5 mmol of dipropylamine (50.6 mg, **2i**) and tosyl azide (**3a**, 438 μL of 75% solution in EtOAc, 1.5 mmol) with Ru(bpy)<sub>3</sub>Cl<sub>2</sub> (6.4 mg, 0.01 mmol) at 25 °C in O<sub>2</sub> under blue LED (12W) irradiation afforded 60.9 mg of **4i** (86%) after flash chromatography on silica gel using petroleum ether and ethyl acetate (4:1 to 3:1, v/v) as the eluent.

Colourless oil. **<sup>1</sup>H NMR (CDCl<sub>3</sub>, 400 MHz):** δ = 8.15 (s, 1H), 7.75 (d, *J* = 8.2 Hz, 2H), 7.24 (d, *J* = 8.2 Hz, 1H), 3.36 (t, *J* = 7.6 Hz, 2H), 3.26 (t, *J* = 7.4 Hz, 2H), 2.39 (s, 3H), 1.65-1.54 (m, 4H), 0.90 (t, *J* = 7.4 Hz, 3H), 0.85 (t, *J* = 7.4 Hz, 3H) ppm. **<sup>13</sup>C NMR (CDCl<sub>3</sub>, 100 MHz):** δ = 158.85, 142.14, 139.79, 129.20, 126.27, 54.20, 47.80, 21.84, 21.39, 19.90, 11.13, 10.78 ppm. **HRMS *m/z* (ESI)** calcd for [C<sub>14</sub>H<sub>22</sub>N<sub>2</sub>O<sub>2</sub>S+H]<sup>+</sup> 283.1475, found 283.1475.

**(*E*)-*N,N*-Dipentyl-*N'*-tosylformimidamide (**4j**)**

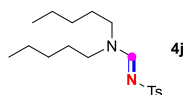

**From tertiary amine:** The reaction of 0.5 mmol of tripentylamine (113.7 mg, **2d**) and tosyl azide (**3a**, 438 μL of 75% solution in EtOAc, 1.5 mmol) with Ru(bpy)<sub>3</sub>Cl<sub>2</sub> (6.4 mg, 0.01 mmol) at 25 °C in O<sub>2</sub> under blue LED (12W) irradiation afforded 138.7 mg of **4j** (82%) after flash chromatography on silica gel using petroleum ether and ethyl acetate (4:1 to 3:1, v/v) as the eluent.

Colourless oil. **<sup>1</sup>H NMR (CDCl<sub>3</sub>, 400 MHz):**  $\delta$  = 8.13 (s, 1H), 7.75 (d,  $J$  = 8.2 Hz, 2H), 7.24 (d,  $J$  = 8.2 Hz, 1H), 3.39 (t,  $J$  = 7.6 Hz, 2H), 3.28 (t,  $J$  = 7.4 Hz, 2H), 2.39 (s, 3H), 1.71-1.49 (m, 4H), 1.36-1.15 (m, 8H), 0.90 (t,  $J$  = 7.3 Hz, 3H), 0.82 (t,  $J$  = 7.2 Hz, 3H) ppm. **<sup>13</sup>C NMR (CDCl<sub>3</sub>, 100 MHz):**  $\delta$  = 158.77, 142.17, 139.91, 129.22, 126.31, 52.53, 46.15, 28.81, 28.50, 28.31, 26.30, 22.25, 22.20, 21.43, 13.88, 13.82 ppm. **HRMS  $m/z$  (ESI)** calcd for [C<sub>18</sub>H<sub>30</sub>N<sub>2</sub>O<sub>2</sub>S+Na]<sup>+</sup> 361.1920, found 361.1919.

**(*E*)-*N*-Ethyl-*N*-phenyl-*N'*-tosylformimidamide (**4k**)** <sup>[2]</sup>

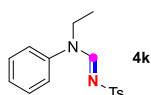

**From tertiary amine:** The reaction of 0.5 mmol of *N,N*-diethylaniline (74.6 mg, **2e**) and tosyl azide (**3a**, 438  $\mu$ L of 75% solution in EtOAc, 1.5 mmol) with Ru(bpy)<sub>3</sub>Cl<sub>2</sub> (6.4 mg, 0.01 mmol) at 25 °C in O<sub>2</sub> under blue LED (12W) irradiation afforded 72.8 mg of **4k** (48%) after flash chromatography on silica gel using petroleum ether and ethyl acetate (8:1 to 6:1,  $v/v$ ) as the eluent.

**From secondary amine:** The reaction of 0.5 mmol of *N*-ethylaniline (60.5 mg, **2k**) and tosyl azide (**3a**, 438  $\mu$ L of 75% solution in EtOAc, 1.5 mmol) with Ru(bpy)<sub>3</sub>Cl<sub>2</sub> (6.4 mg, 0.01 mmol) at 25 °C in O<sub>2</sub> under blue LED (12W) irradiation afforded 41.1 mg of **4k** (54%) after flash chromatography on silica gel using petroleum ether and ethyl acetate (8:1 to 6:1,  $v/v$ ) as the eluent.

Yellow oil. **<sup>1</sup>H NMR (CDCl<sub>3</sub>, 400 MHz):**  $\delta$  = 8.45 (s, 1H), 7.81 (d,  $J$  = 8.2 Hz, 2H), 7.45-7.41 (m, 2H), 7.36-7.34 (m, 1H), 7.28 (d,  $J$  = 8.0 Hz, 2H), 7.20-7.18 (m, 2H), 3.96 (q,  $J$  = 7.2 Hz, 2H), 2.41 (s, 3H), 1.17 (t,  $J$  = 7.2 Hz, 3H) ppm. **<sup>13</sup>C NMR (CDCl<sub>3</sub>, 100 MHz):**  $\delta$  = 158.05, 142.63, 141.88, 139.11, 129.82, 129.34, 127.65, 126.56, 123.54, 44.05, 21.44, 12.32 ppm. **HRMS  $m/z$  (ESI)** calcd for [C<sub>16</sub>H<sub>18</sub>N<sub>2</sub>O<sub>2</sub>S+H]<sup>+</sup> 303.1162, found 303.1160.

**(*E*)-*N*-Ethyl-*N*-cyclohexyl-*N'*-tosylformimidamide (**4l**)**

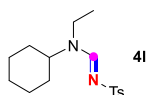

**From tertiary amine:** The reaction of 0.5 mmol of *N,N*-diethylcyclohexanamine (77.6 mg, **2f**) and tosyl azide (**3a**, 438  $\mu$ L of 75% solution in EtOAc, 1.5 mmol) with Ru(bpy)<sub>3</sub>Cl<sub>2</sub> (6.4 mg, 0.01 mmol) at 25 °C in O<sub>2</sub> under blue LED (12W) irradiation afforded 103.6 mg of **4l** (67%) after flash chromatography on silica gel using petroleum ether and ethyl acetate (8:1 to 6:1,  $v/v$ ) as the eluent.

**From secondary amine:** The reaction of 0.5 mmol of *N*-ethylcyclohexanamine (63.6 mg, **2n**) and tosyl azide (**3a**, 438  $\mu$ L of 75% solution in EtOAc, 1.5 mmol) with Ru(bpy)<sub>3</sub>Cl<sub>2</sub> (6.4 mg, 0.01 mmol) at 25 °C in O<sub>2</sub> under blue LED (12W) irradiation for 24 hours afforded 55.6 mg of **4l** (72%) after flash chromatography on silica gel using petroleum ether and ethyl acetate (8:1 to 6:1, *v/v*) as the eluent.

White solid, m.p. 94.4-95.5 °C. <sup>1</sup>H NMR (CDCl<sub>3</sub>, 400 MHz):  $\delta$  = 8.21 (s, 1H), 7.76 (d, *J* = 8.2 Hz, 2H), 7.25 (d, *J* = 8.1 Hz, 2H), 3.43 (q, *J* = 7.2 Hz, 2H), 3.25-3.17 (m, 1H), 2.39 (s, 3H), 1.88-1.68 (m, 6H), 1.54-1.44 (m, 2H), 1.36-1.24 (m, 2H), 1.15 (t, *J* = 7.2 Hz, 3H) ppm. <sup>13</sup>C NMR (CDCl<sub>3</sub>, 100 MHz):  $\delta$  = 157.22, 142.07, 139.94, 129.19, 126.26, 62.97, 40.54, 32.52, 25.56, 24.96, 21.40, 13.27 ppm. HRMS *m/z* (ESI) calcd for [C<sub>16</sub>H<sub>24</sub>N<sub>2</sub>O<sub>2</sub>S+H]<sup>+</sup> 309.1631, found 309.1631.

**(*E*)-4-Methyl-*N*-(piperidin-1-ylmethylene)benzenesulfonimide (**4m**)** <sup>[2]</sup>

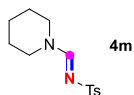

**From tertiary amine:** The reaction of 0.5 mmol of *N*-ethylpiperidine (56.6, **2g**) and tosyl azide (**3a**, 438  $\mu$ L of 75% solution in EtOAc, 1.5 mmol) with Ru(bpy)<sub>3</sub>Cl<sub>2</sub> (6.4 mg, 0.01 mmol) at 25 °C in O<sub>2</sub> under blue LED (12W) irradiation afforded 93.5 mg of **4m** (70%) after flash chromatography on silica gel using petroleum ether and ethyl acetate (4:1 to 3:1, *v/v*) as the eluent.

Colourless oil. <sup>1</sup>H NMR (CDCl<sub>3</sub>, 400 MHz):  $\delta$  = 8.12 (s, 1H), 7.76 (d, *J* = 8.2 Hz, 2H), 7.25 (d, *J* = 8.0 Hz, 2H), 3.59 (t, *J* = 5.6 Hz, 2H), 3.41 (t, *J* = 5.6 Hz, 2H), 2.39 (s, 3H), 1.67-1.57 (m, 6H) ppm. <sup>13</sup>C NMR (CDCl<sub>3</sub>, 100 MHz):  $\delta$  = 157.23, 142.27, 139.65, 129.23, 126.40, 51.82, 44.58, 26.36, 24.79, 23.90, 21.40 ppm. HRMS *m/z* (ESI) calcd for [C<sub>13</sub>H<sub>18</sub>N<sub>2</sub>O<sub>2</sub>S+H]<sup>+</sup> 267.1162, found 267.1164.

**(*E*)-*N,N*-Dibutyl-*N'*-tosylformimidamide (**4n**)** <sup>[2]</sup>

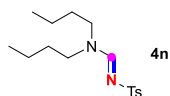

**From secondary amine:** The reaction of 0.5 mmol of dibutylamine (71.6 mg, **2j**) and tosyl azide (**3a**, 438  $\mu$ L of 75% solution in EtOAc, 1.5 mmol) with Ru(bpy)<sub>3</sub>Cl<sub>2</sub> (6.4 mg, 0.01 mmol) at 25 °C in O<sub>2</sub> under blue LED (12W) irradiation afforded 69.6 mg of **4n** (90%) after flash chromatography on silica gel using petroleum ether and ethyl acetate (4:1 to 3:1, *v/v*) as the eluent.

Colourless oil. <sup>1</sup>H NMR (CDCl<sub>3</sub>, 400 MHz):  $\delta$  = 8.13 (s, 1H), 7.75 (d, *J* = 8.3 Hz, 2H), 7.25 (d, *J* = 8.0 Hz,

1H), 3.39 (t,  $J = 7.6$  Hz, 2H), 3.28 (t,  $J = 7.4$  Hz, 2H), 2.39 (s, 3H), 1.59-1.47 (m, 4H), 1.33-1.23 (m, 4H), 0.94 (t,  $J = 7.3$  Hz, 3H), 0.87 (t,  $J = 7.3$  Hz, 3H) ppm.  $^{13}\text{C}$  NMR ( $\text{CDCl}_3$ , 100 MHz):  $\delta = 158.70, 142.14, 139.84, 129.18, 126.29, 52.26, 45.93, 30.66, 28.65, 21.41, 19.90, 19.59, 13.63, 13.53$  ppm. HRMS  $m/z$  (ESI) calcd for  $[\text{C}_{16}\text{H}_{26}\text{N}_2\text{O}_2\text{S}+\text{Na}]^+$  333.1607, found 333.1611.

**(*E/Z*)-*N*-Butyl-*N*-phenyl-*N'*-tosylformimidamide (*E:Z*  $\approx$  97:3) (**4o**)**

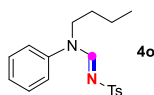

**From secondary amine:** The reaction of 0.5 mmol of *N*-butylaniline (74.6 mg, **2l**) and tosyl azide (**3a**, 438  $\mu\text{L}$  of 75% solution in EtOAc, 1.5 mmol) with  $\text{Ru}(\text{bpy})_3\text{Cl}_2$  (6.4 mg, 0.01 mmol) at 25  $^\circ\text{C}$  in  $\text{O}_2$  under blue LED (12W) irradiation afforded 39.8 mg of **4o** (48%) after flash chromatography on silica gel using petroleum ether and ethyl acetate (8:1 to 6:1,  $v/v$ ) as the eluent.

Yellow oil.  $^1\text{H}$  NMR ( $\text{CDCl}_3$ , 400 MHz):  $\delta = 8.46$  (s, 1H), 7.80 (d,  $J = 8.3$  Hz, 2H), 7.45-7.41 (m, 2H), 7.36-7.32 (m, 1H), 7.30-7.27 (m, 2H), 7.20-7.18 (m, 2H), 3.92 (t,  $J = 7.6$  Hz, 2H), 2.42 (s, 3H), 1.53 (p,  $J = 7.6$  Hz, 2H), 1.31-1.21 (m, 2H), 0.83 (t,  $J = 7.3$  Hz, 3H) ppm.  $^{13}\text{C}$  NMR ( $\text{CDCl}_3$ , 100 MHz):  $\delta = 158.53, 142.64, 142.06, 139.09, 129.84, 129.35, 127.65, 126.54, 123.59, 48.53, 28.91, 21.50, 19.79, 13.59$  ppm. HRMS  $m/z$  (ESI) calcd for  $[\text{C}_{18}\text{H}_{22}\text{N}_2\text{O}_2\text{S}+\text{Na}]^+$  353.1294, found 353.1285.

**(*E*)-*N*-Ethyl-*N*-(*m*-tolyl)-*N'*-tosylformimidamide (**4p**)**

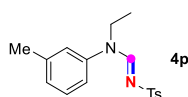

**From secondary amine:** The reaction of 0.5 mmol of *N*-ethyl-3-methylaniline (67.6 mg, **2m**) and tosyl azide (**3a**, 438  $\mu\text{L}$  of 75% solution in EtOAc, 1.5 mmol) with  $\text{Ru}(\text{bpy})_3\text{Cl}_2$  (6.4 mg, 0.01 mmol) at 25  $^\circ\text{C}$  in  $\text{O}_2$  under blue LED (12W) irradiation for 24 hours afforded 43.4 mg of **4p** (55%) after flash chromatography on silica gel using petroleum ether and ethyl acetate (8:1 to 6:1,  $v/v$ ) as the eluent.

Yellow oil.  $^1\text{H}$  NMR ( $\text{CDCl}_3$ , 400 MHz):  $\delta = 8.44$  (s, 1H), 7.81 (d,  $J = 8.0$  Hz, 2H), 7.32-7.26 (m, 3H), 7.15 (d,  $J = 7.6$  Hz, 1H), 6.99-6.98 (m, 2H), 3.95 (q,  $J = 7.2$  Hz, 2H), 2.41 (s, 3H), 2.39 (s, 3H), 1.17 (t,  $J = 7.2$  Hz, 3H) ppm.  $^{13}\text{C}$  NMR ( $\text{CDCl}_3$ , 100 MHz):  $\delta = 158.06, 142.62, 141.83, 140.06, 139.16, 129.59, 129.36, 128.43, 126.56, 124.22, 120.53, 44.05, 21.49, 21.33, 12.37$  ppm. HRMS  $m/z$  (ESI) calcd for  $[\text{C}_{17}\text{H}_{20}\text{N}_2\text{O}_2\text{S}+\text{H}]^+$  317.1318, found 317.1322.

#### 4) Gram-scale reactions of visible-light-enabled imidation with azides promoted by aerobic ruthenium catalysis (Scheme 2)

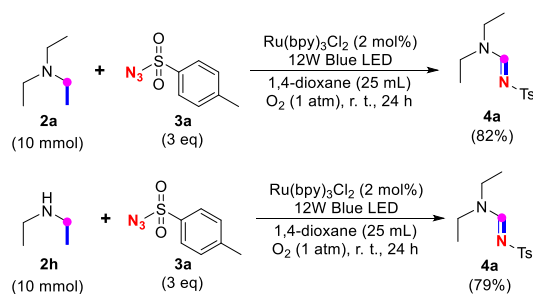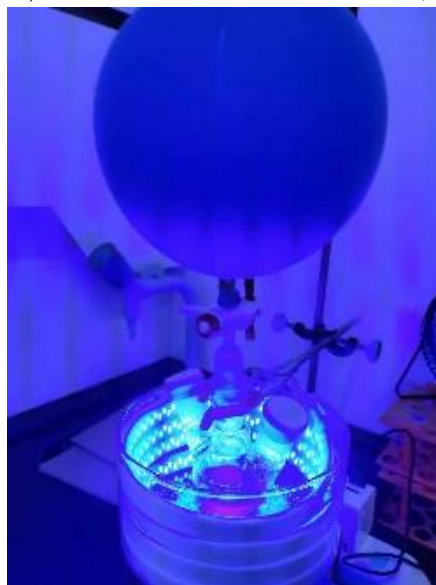

**Typical Procedure:** To a three-necked flask charged with  $\text{Ru(bpy)}_3\text{Cl}_2$  (128.1 mg, 0.2 mmol) was added a solution of tosyl azide (**3a**, 8.76 mL of 75% solution in EtOAc, 30 mmol) in anhydrous 1,4-dioxane (15 mL) via a syringe under  $\text{O}_2$  (1 atm). Then a solution of triethylamine (**2a**, 1.01 g, 10 mmol) in anhydrous 1,4-dioxane (10 mL) was added via a syringe upon blue LED irradiation of a coiled 12W blue LED band (2 meters long, coiled as a four-layer ring with a diameter of 16 cm, and the flask is located in the center of this LED ring, as shown in the above picture). The reaction mixture was stirred at 25 °C in  $\text{O}_2$  under blue LED (12W) irradiation for 24 hours, followed by concentration *in vacuo* to give dark residue, which was then purified by flash chromatography using petroleum ether and ethyl acetate (4:1 to 3:1, *v/v*) as the eluent on silical gel to afford 2.09 g of the iminated product **4a** (82%). The yield of **4a** from this tertiary amine was calculated based on the loading of **2a**: acquisition of 10 mmol of **4a** from **2a** is equivalent to 100% yield.

Employing the same apparatus via the above procedure, the reaction of 10 mmol of diethylamine (**2h**, g, 10 mmol) and tosyl azide (**3a**, 8.76 mL of 75% solution in EtOAc, 30 mmol) with  $\text{Ru(bpy)}_3\text{Cl}_2$  (128.1 mg, 0.2

mmol) at 25 °C in O<sub>2</sub> under blue LED (12W) irradiation for 24 hours afforded 1.01 g of the iminated product **4a** (79%). The yield of **4a** from this secondary amine was calculated based on the loading of **2h**: acquisition of 5 mmol of **4a** from **2h** is equivalent to 100% yield.

### 5) Reactions with other commonly used ruthenium catalysts

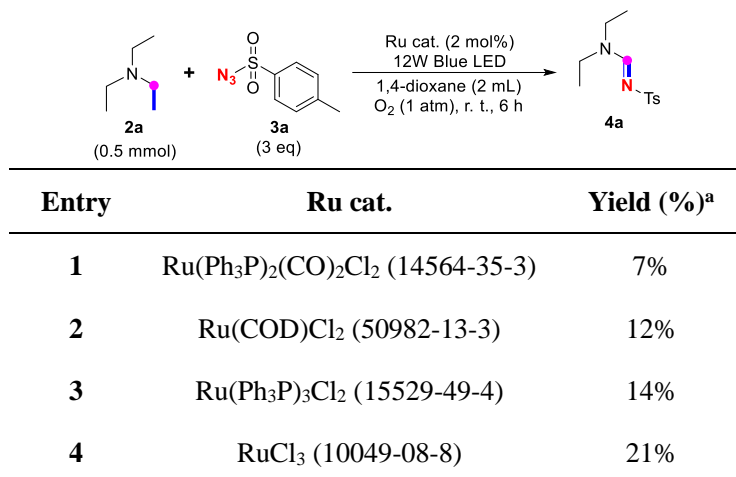

<sup>a</sup> Reaction conditions: TEA **2a** (0.5 mmol), TsN<sub>3</sub> (1.5 mmol), Ru catalyst (0.01 mmol) in 1,4-dioxane (2 mL) at room temperature in O<sub>2</sub> (1 atm) under 12W blue LED irradiation for 6 hours. <sup>b</sup> Isolated yields of **4a** based on **2a**.

## Control Experiments

### 1) Control experiments on tertiary amine 2a (Table 4)

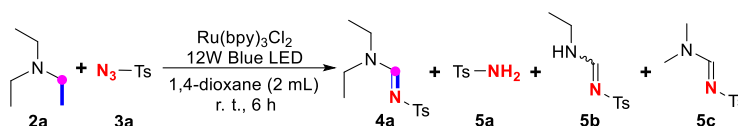

#### **Typical Procedures:**

**Entry 1:** To a reaction tube charged with  $\text{Ru}(\text{bpy})_3\text{Cl}_2$  (6.4 mg, 0.01 mmol) was added a solution of tosyl azide (**3a**, 438  $\mu\text{L}$  of 75% solution in EtOAc, 1.5 mmol) in anhydrous 1,4-dioxane (1 mL) via a syringe under  $\text{O}_2$  (1 atm). Then a solution of triethylamine (TEA, **2a**, 50.6 mg, 0.5 mmol) in anhydrous 1,4-dioxane (1 mL) was added via a syringe upon blue LED (12W) irradiation. The reaction mixture was stirred at 25  $^\circ\text{C}$  in  $\text{O}_2$  under blue LED (12W) irradiation for 6 hours, followed by concentration *in vacuo* to give dark residue, which was then purified by flash chromatography using petroleum ether and ethyl acetate (3:1 to 2:1 to 1:1, v/v) as the eluent on silical gel to afford 109.8 mg of **4a** (86%), 76.4 mg of **5a** (89%), 8.1 mg of **5b** (7%) and 7.0 mg of **5c** (6%).

**Entry 2:** To a reaction tube charged with  $\text{Ru}(\text{bpy})_3\text{Cl}_2$  (6.4 mg, 0.01 mmol) was added a solution of tosyl azide (**3a**, 438  $\mu\text{L}$  of 75% solution in EtOAc, 1.5 mmol) in anhydrous 1,4-dioxane (1 mL) via a syringe under argon (1 atm). Then a solution of triethylamine (TEA, **2a**, 50.6 mg, 0.5 mmol) in anhydrous 1,4-dioxane (1 mL) was added via a syringe upon blue LED (12W) irradiation. The reaction mixture was stirred at 25  $^\circ\text{C}$  in argon under blue LED (12W) irradiation for 6 hours, followed by concentration *in vacuo* to give dark residue, which was then purified by flash chromatography using petroleum ether and ethyl acetate (3:1 to 2:1 to 1:1, v/v) as the eluent on silical gel to afford 66.4 mg of **4a** (52%), 76.8 mg of **5a** (90%), 5.7 mg of **5b** (5%) and 8.8 mg of **5c** (8%).

**Entry 3:** To a reaction tube was added a solution of tosyl azide (**3a**, 438  $\mu\text{L}$  of 75% solution in EtOAc, 1.5 mmol) in anhydrous 1,4-dioxane (1 mL) via a syringe under  $\text{O}_2$  (1 atm). Then a solution of triethylamine (TEA, **2a**, 50.6 mg, 0.5 mmol) in anhydrous 1,4-dioxane (1 mL) was added via a syringe upon blue LED (12W) irradiation. The reaction mixture was stirred at 25  $^\circ\text{C}$  in  $\text{O}_2$  under blue LED (12W) irradiation for 6 hours, followed by concentration *in vacuo* to give dark residue, which was then purified by flash

chromatography using petroleum ether and ethyl acetate (3:1 to 2:1 to 1:1, v/v) as the eluent on silical gel to afford 32.3 mg of **4a** (25%), 38.2 mg of **5a** (45%) and 7.0 mg of **5b** (6%). None of **5c** could be observe on GC-MS.

**Entry 4:** To a reaction tube was added a solution of tosyl azide (**3a**, 438  $\mu$ L of 75% solution in EtOAc, 1.5 mmol) in anhydrous 1,4-dioxane (1 mL) via a syringe under argon (1 atm). Then a solution of triethylamine (TEA, **2a**, 50.6 mg, 0.5 mmol) in anhydrous 1,4-dioxane (1 mL) was added via a syringe upon blue LED (12W) irradiation. The reaction mixture was stirred at 25 °C in argon under blue LED (12W) irradiation for 6 hours, followed by concentration *in vacuo* to give dark residue, which was then purified by flash chromatography using petroleum ether and ethyl acetate (3:1 to 2:1 to 1:1, v/v) as the eluent on silical gel to afford 33.1 mg of **4a** (26%), 42.2 mg of **5a** (49%) and 5.4 mg of **5b** (5%). None of **5c** could be observe on GC-MS.

**Entry 5:** To a reaction tube tightly wrapped with tinfoil and charged with Ru(bpy)<sub>3</sub>Cl<sub>2</sub> (6.4 mg, 0.01 mmol) was added a solution of tosyl azide (**3a**, 438  $\mu$ L of 75% solution in EtOAc, 1.5 mmol) in anhydrous 1,4-dioxane (1 mL) via a syringe under O<sub>2</sub> (1 atm). Then a solution of triethylamine (TEA, **2a**, 50.6 mg, 0.5 mmol) in anhydrous 1,4-dioxane (1 mL) was added via a syringe. The reaction mixture was stirred at 25 °C in dark for 6 hours, and none of **4a** or **5a-c** could be observed on GC-MS.

**Entry 6:** To a reaction tube charged with Ru(bpy)<sub>3</sub>Cl<sub>2</sub> (6.4 mg, 0.01 mmol) was added a solution of tosyl azide (**3a**, 438  $\mu$ L of 75% solution in EtOAc, 1.5 mmol) in anhydrous 1,4-dioxane (1 mL) via a syringe under O<sub>2</sub> (1 atm). Then a solution of triethylamine (TEA, **2a**, 50.6 mg, 0.5 mmol) and TEMPO (390.6 mg, 2.5 mmol) in anhydrous 1,4-dioxane (1 mL) was added via a syringe upon blue LED (12W) irradiation. The reaction mixture was stirred at 25 °C in O<sub>2</sub> under blue LED (12W) irradiation for 6 hours, and none of **4a** or **5a-c** could be observed on GC-MS.

**Entry 7:** To a reaction tube charged with Ru(bpy)<sub>3</sub>Cl<sub>2</sub> (6.4 mg, 0.01 mmol) was added a solution of tosyl azide (**3a**, 438  $\mu$ L of 75% solution in EtOAc, 1.5 mmol) in anhydrous 1,4-dioxane (2 mL) via a syringe under O<sub>2</sub> (1 atm). Then the reaction mixture was stirred at 25 °C in O<sub>2</sub> under blue LED (12W) irradiation for 6 hours, and none of **4a** or **5a-c** could be observed on GC-MS.

#### 4-Methylbenzenesulfonamide (**5a**)<sup>[5]</sup>

White solid, m.p. 114.0-114.6 °C. <sup>1</sup>H NMR (DMSO-d<sub>6</sub>, 400 MHz):  $\delta$  = 7.71 (d, *J* = 8.2 Hz, 2H), 7.36 (d, *J* = 8.0 Hz, 2H), 7.26 (s, 2H), 2.37 (s, 3H) ppm. <sup>13</sup>C NMR (DMSO-d<sub>6</sub>, 100 MHz):  $\delta$  = 141.82, 141.42, 129.26, 125.59, 20.87 ppm. GC-MS *m/z* (EI) calcd for [C<sub>7</sub>H<sub>9</sub>NO<sub>2</sub>S] 171.04, found 171.0.

**(*E/Z*)-*N*-Ethyl-*N'*-tosylformimidamide (*E:Z*  $\approx$  4:1) (**5b**)**

White solid, m.p. 80.2-80.7 °C.  $^1\text{H}$  NMR ( $\text{CDCl}_3$ , 400 MHz):  $\delta$  = 8.26 (d,  $J$  = 5.1 Hz, 1.00H), 8.12 (d,  $J$  = 13.5 Hz, 0.28H), 7.75-7.71 (m, 2.56H), 7.28-7.25 (m, 2.54H), 6.67 (s, 1.00H), 3.42-3.34 (m, 2.47H), 2.40 (s, 3.78 H), 1.24 (t,  $J$  = 7.2 Hz, 0.75H), 1.16 (t,  $J$  = 7.3 Hz, 3.01H) ppm.  $^{13}\text{C}$  NMR ( $\text{CDCl}_3$ , 100 MHz):  $\delta$  = 157.64, 142.87, 142.57, 139.20, 138.86, 129.48, 129.34, 126.35, 126.33, 41.30, 36.74, 21.44, 18.99, 15.91, 13.68 ppm. HRMS  $m/z$  (ESI) calcd for  $[\text{C}_{10}\text{H}_{14}\text{N}_2\text{O}_2\text{S}+\text{H}]^+$  227.0849, found 227.0857.

**(*E*)-*N,N*-Dimethyl-*N'*-tosylformimidamide (**5c**)<sup>[2]</sup>**

Light-yellow solid, m.p. 93.2-93.8 °C.  $^1\text{H}$  NMR ( $\text{CDCl}_3$ , 400 MHz):  $\delta$  = 8.13 (s, 1H), 7.77 (d,  $J$  = 8.0 Hz, 2H), 7.26 (d,  $J$  = 8.0 Hz, 2H), 3.31 (s, 3H), 3.01 (s, 3H), 2.40 (s, 3H) ppm.  $^{13}\text{C}$  NMR ( $\text{CDCl}_3$ , 100 MHz):  $\delta$  = 159.03, 142.44, 139.46, 129.29, 126.45, 41.43, 35.46, 21.45 ppm. HRMS  $m/z$  (ESI) calcd for  $[\text{C}_{10}\text{H}_{14}\text{N}_2\text{O}_2\text{S}+\text{H}]^+$  227.0849, found 227.0852.

**2) Control experiments on *N*-substituted enamine **1b** (Table 5)**

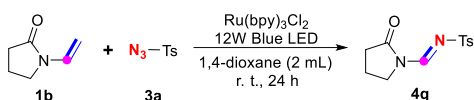

**Typical Procedures:**

**Entry 1:** To a reaction tube charged with  $\text{Ru}(\text{bpy})_3\text{Cl}_2$  (6.4 mg, 0.01 mmol) was added a solution of tosyl azide (**3a**, 438  $\mu\text{L}$  of 75% solution in EtOAc, 1.5 mmol) in anhydrous 1,4-dioxane (1 mL) via a syringe under  $\text{O}_2$  (1 atm). Then a solution of 1-vinylpyrrolidin-2-one (**1b**, 55.5 mg, 0.5 mmol) in anhydrous 1,4-dioxane (1 mL) was added via a syringe upon blue LED (12W) irradiation. The reaction mixture was stirred at 25 °C in  $\text{O}_2$  under blue LED (12W) irradiation for 24 hours, followed by concentration *in vacuo* to give dark residue, which was then purified by flash chromatography using petroleum ether and ethyl acetate (4:1 to 3:1, v/v) as the eluent on silical gel to afford 41.5 mg of **4x** (31%).

**Entry 2:** To a reaction tube charged with  $\text{Ru}(\text{bpy})_3\text{Cl}_2$  (6.4 mg, 0.01 mmol) was added a solution of tosyl azide (**3a**, 438  $\mu\text{L}$  of 75% solution in EtOAc, 1.5 mmol) in anhydrous 1,4-dioxane (1 mL) via a syringe under argon (1 atm). Then a solution of 1-vinylpyrrolidin-2-one (**1b**, 55.5 mg, 0.5 mmol) in anhydrous 1,4-dioxane (1 mL) was added via a syringe upon blue LED (12W) irradiation. The reaction mixture was stirred at 25 °C in argon under blue LED (12W) irradiation for 24 hours, followed by concentration *in vacuo* to give dark residue, which was then purified by flash chromatography using petroleum ether and ethyl acetate (4:1 to 3:1, v/v) as the eluent on silical gel to afford 14.9 mg of **4x** (11%).

**Entry 3:** To a reaction tube was added a solution of tosyl azide (**3a**, 438  $\mu$ L of 75% solution in EtOAc, 1.5 mmol) in anhydrous 1,4-dioxane (1 mL) via a syringe under O<sub>2</sub> (1 atm). Then a solution of 1-vinylpyrrolidin-2-one (**1b**, 55.5 mg, 0.5 mmol) in anhydrous 1,4-dioxane (1 mL) was added via a syringe upon blue LED (12W) irradiation. The reaction mixture was stirred at 25 °C in O<sub>2</sub> under blue LED (12W) irradiation for 24 hours, and only trace amount of amidine **4q** could be observed on TLC.

**Entry 4:** To a reaction tube was added a solution of tosyl azide (**3a**, 438  $\mu$ L of 75% solution in EtOAc, 1.5 mmol) in anhydrous 1,4-dioxane (1 mL) via a syringe under argon (1 atm). Then a solution of 1-vinylpyrrolidin-2-one (**1b**, 55.5 mg, 0.5 mmol) in anhydrous 1,4-dioxane (1 mL) was added via a syringe upon blue LED (12W) irradiation. The reaction mixture was stirred at 25 °C in argon under blue LED (12W) irradiation for 24 hours, and only trace amount of amidine **4q** could be observed on TLC.

**Entry 5:** To a reaction tube tightly wrapped with tinfoil and charged with Ru(bpy)<sub>3</sub>Cl<sub>2</sub> (6.4 mg, 0.01 mmol) was added a solution of tosyl azide (**3a**, 438  $\mu$ L of 75% solution in EtOAc, 1.5 mmol) in anhydrous 1,4-dioxane (1 mL) via a syringe under O<sub>2</sub> (1 atm). Then a solution of 1-vinylpyrrolidin-2-one (**1b**, 55.5 mg, 0.5 mmol) in anhydrous 1,4-dioxane (1 mL) was added via a syringe. The reaction mixture was stirred in dark at 25 °C in O<sub>2</sub> for 24 hours, and only trace amount of amidine **4q** could be observed on TLC.

**Entry 6:** To a reaction tube tightly wrapped with tinfoil and charged with Ru(bpy)<sub>3</sub>Cl<sub>2</sub> (6.4 mg, 0.01 mmol) was added a solution of tosyl azide (**3a**, 438  $\mu$ L of 75% solution in EtOAc, 1.5 mmol) in anhydrous 1,4-dioxane (1 mL) via a syringe under argon (1 atm). Then a solution of 1-vinylpyrrolidin-2-one (**1b**, 55.5 mg, 0.5 mmol) in anhydrous 1,4-dioxane (1 mL) was added via a syringe. The reaction mixture was stirred in dark at 25 °C in argon for 24 hours, and only trace amount of amidine **4q** could be observed on TLC.

**(E)-4-Methyl-N-((2-oxopyrrolidin-1-yl)methylene)benzenesulfonamide (**4q**)**

White solid, m.p. 137.2-137.7 °C. <sup>1</sup>H NMR (CDCl<sub>3</sub>, 400 MHz):  $\delta$  = 9.00 (s, 1H), 7.81 (d,  $J$  = 7.9 Hz, 2H), 7.32 (d,  $J$  = 7.9 Hz, 2H), 3.77 (t,  $J$  = 7.3 Hz, 2H), 3.62 (t,  $J$  = 8.1 Hz, 2H), 2.43 (s, 3H), 2.16 (p,  $J$  = 7.7 Hz, 2H) ppm. <sup>13</sup>C NMR (CDCl<sub>3</sub>, 100 MHz):  $\delta$  = 175.80, 153.32, 144.10, 136.46, 129.67, 127.50, 44.15, 31.42, 21.59, 17.76 ppm. HRMS  $m/z$  (ESI) calcd for [C<sub>12</sub>H<sub>14</sub>N<sub>2</sub>O<sub>3</sub>S+H]<sup>+</sup> 267.0798, found 267.0800.

**3) Control experiments on secondary amine 2h (Scheme 3)**

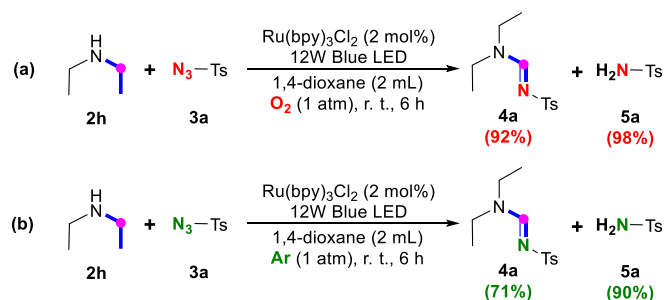

**Typical Procedure for Scheme 3a:** To a reaction tube charged with  $\text{Ru}(\text{bpy})_3\text{Cl}_2$  (6.4 mg, 0.01 mmol) was added a solution of tosyl azide (**3a**, 438  $\mu\text{L}$  of 75% solution in EtOAc, 1.5 mmol) in anhydrous 1,4-dioxane (1 mL) via a syringe under  $\text{O}_2$  (1 atm). Then a solution of diethylamine (DEA, **2h**, 36.6 mg) in anhydrous 1,4-dioxane (1 mL) was added via a syringe upon blue LED (12W) irradiation. The reaction mixture was stirred at 25  $^\circ\text{C}$  in  $\text{O}_2$  under blue LED (12W) irradiation for 6 hours, followed by concentration *in vacuo* to give dark residue, which was then purified by flash chromatography using petroleum ether and ethyl acetate (4:1 to 3:1, v/v) as the eluent on silical gel to afford 58.2 mg of **4a** (92%) and 84.0 mg of **5a** (98%).

**Typical Procedure for Scheme 3b:** To a reaction tube charged with  $\text{Ru}(\text{bpy})_3\text{Cl}_2$  (6.4 mg, 0.01 mmol) was added a solution of tosyl azide (**3a**, 438  $\mu\text{L}$  of 75% solution in EtOAc, 1.5 mmol) in anhydrous 1,4-dioxane (1 mL) via a syringe under argon (1 atm). Then a solution of diethylamine (DEA, **2h**, 36.6 mg) in anhydrous 1,4-dioxane (1 mL) was added via a syringe upon blue LED (12W) irradiation. The reaction mixture was stirred at 25  $^\circ\text{C}$  in argon under blue LED (12W) irradiation for 6 hours, followed by concentration *in vacuo* to give dark residue, which was then purified by flash chromatography using petroleum ether and ethyl acetate (4:1 to 3:1, v/v) as the eluent on silical gel to afford 89.8 mg of **4a** (71%) and 76.6 mg of **5a** (90%).

## **References**

- [1] T. Jiang, Z. Y. Gu, L. Yin, S. Y. Wang and S. J. Ji, *J. Org. Chem.*, 2017, **82**, 7913-7919.
- [2] J. Gui, H. Xie, H. Jiang and W. Zeng, *Org. Lett.*, 2019, **21**, 2804-2807.
- [3] R. Ding, H. Chen, Y.-L. Xu, H.-T. Tang, Y.-Y. Chen and Y.-M. Pan, *Adv. Synth. Catal.*, 2019, **361**, 3656-3660.
- [4] Please visit [https://www.tansoole.com/upload/detail/05/YC93\\_WGLV\\_05039134.html](https://www.tansoole.com/upload/detail/05/YC93_WGLV_05039134.html) for purchasing the Titan Scientific Lab PR-6 parallel photoreactor (May 19th, 2021).
- [5] E. Hayashi, Y. Yamaguchi, Y. Kita and M. Hara, *Chem. Commun.*, 2020, **56**, 2095-2098.

### **<sup>1</sup>H and <sup>13</sup>C NMR spectra of 4a-q and 5a-c**

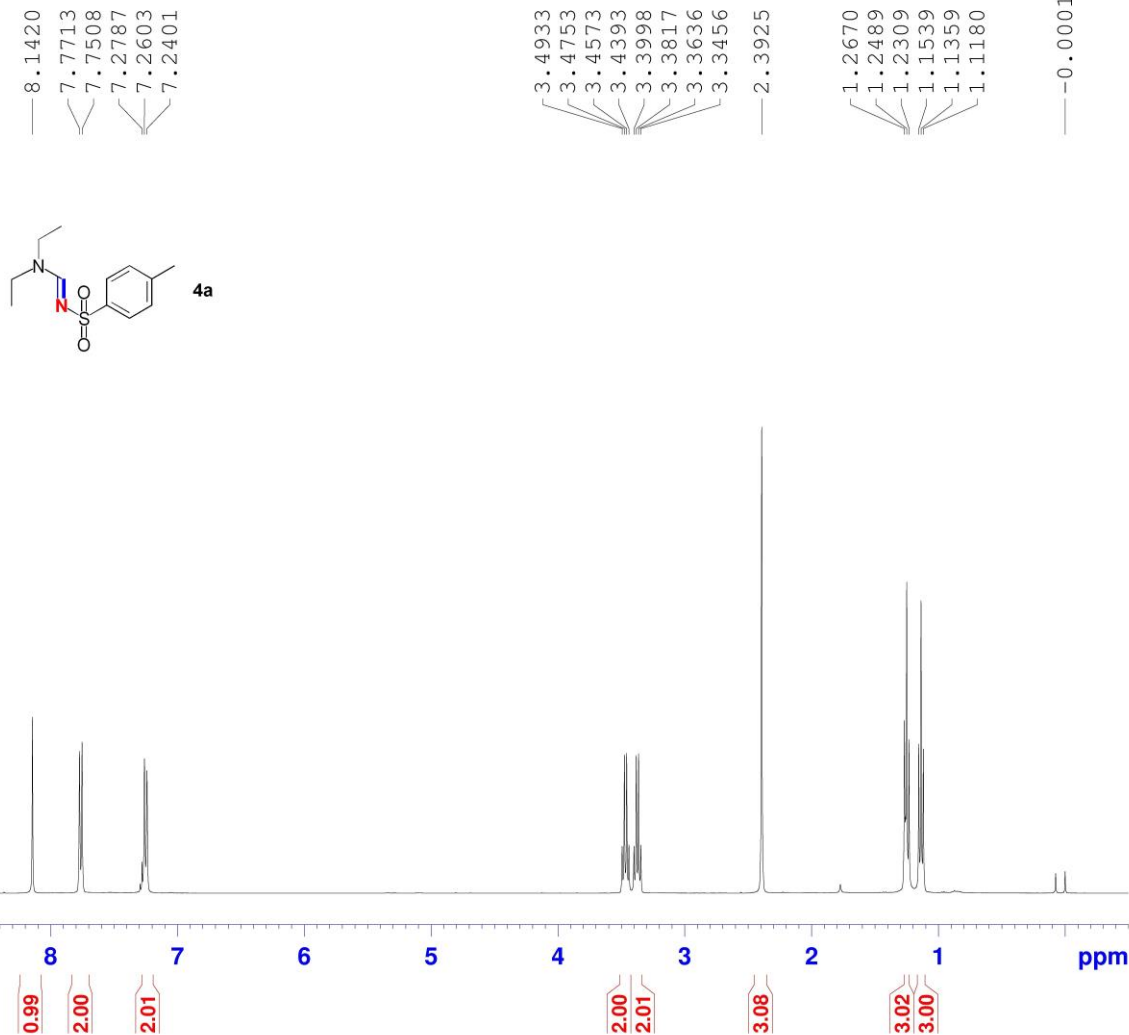

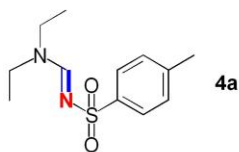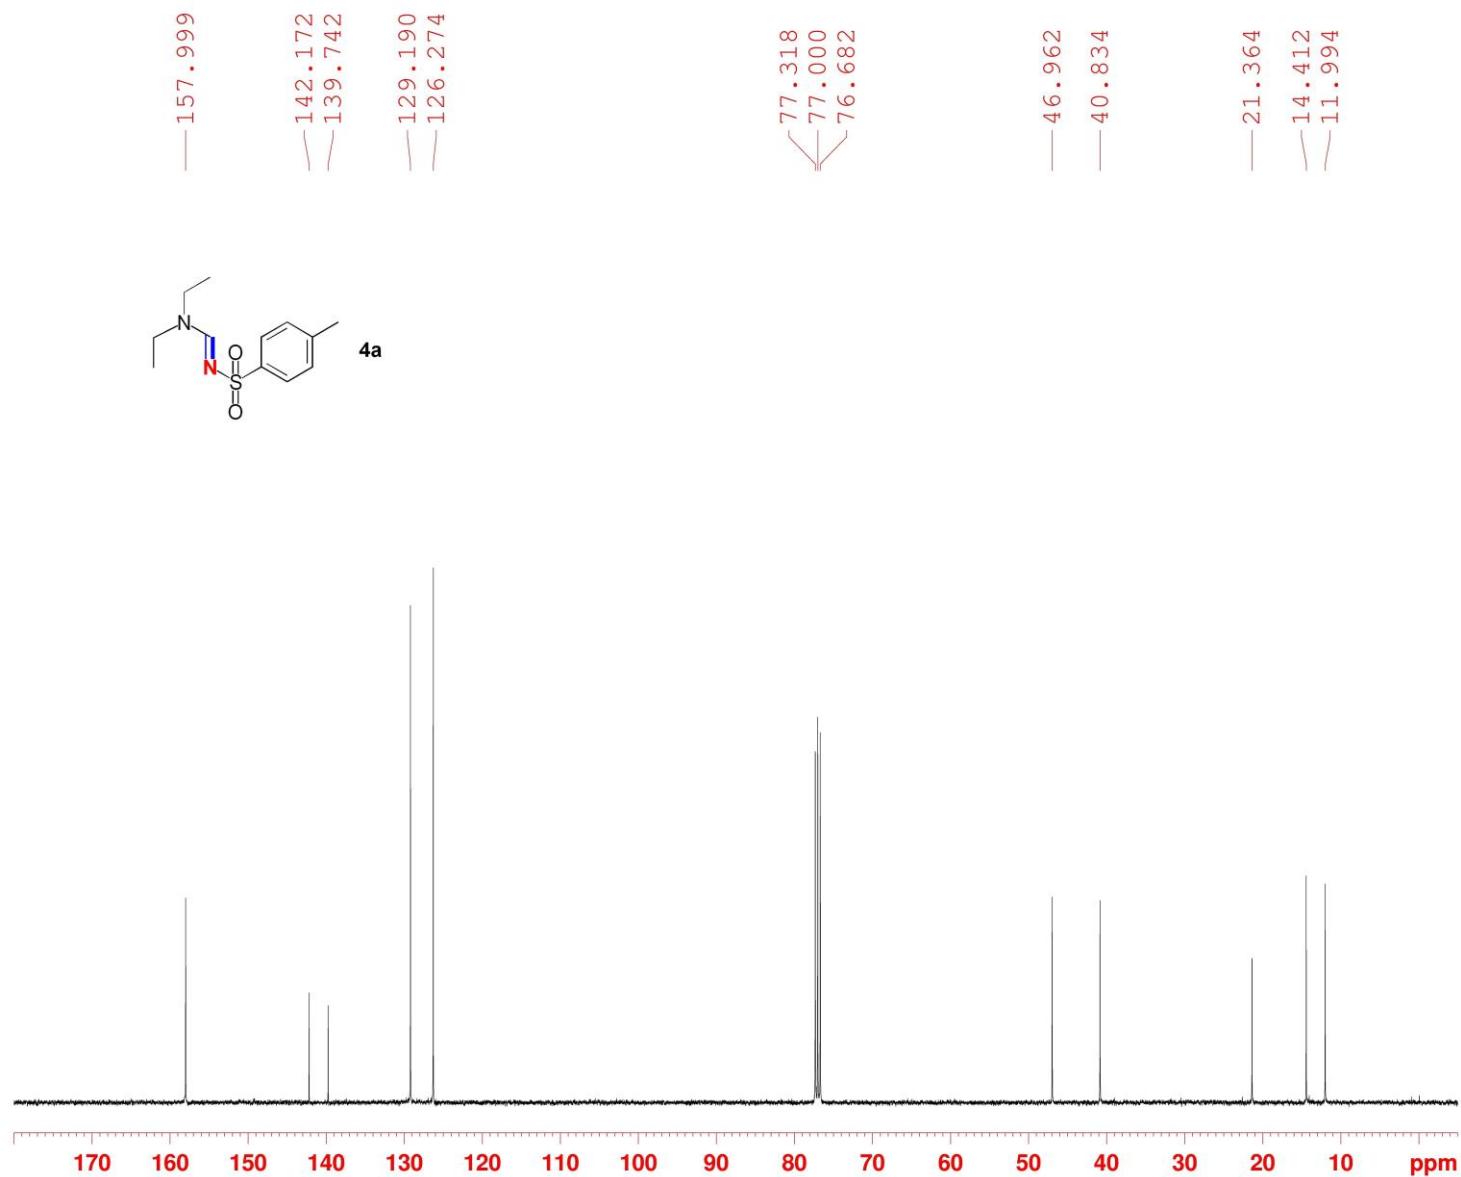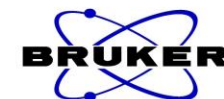

```

NAME      CLJ-WL-S332
EXPNO     2
PROCNO    1
Date_     20181201
Time      7.43
INSTRUM   spect
PROBHD    5 mm PABBO BB/
PULPROG   zgpg30
TD        65536
SOLVENT   CDCl3
NS        512
DS        0
SWH       24038.461 Hz
FIDRES    0.366798 Hz
AQ        1.3631988 sec
RG        194.26
DW        20.800 usec
DE        6.50 usec
TE        300.2 K
D1        2.00000000 sec
D11       0.03000000 sec
TD0       1
  
```

```

===== CHANNEL f1 =====
SFO1    100.6228293 MHz
NUC1     13C
P1       8.54 usec
SI       32768
SF       100.6127768 MHz
WDW      EM
SSB      0
LB       1.00 Hz
GB       0
PC       1.40
  
```

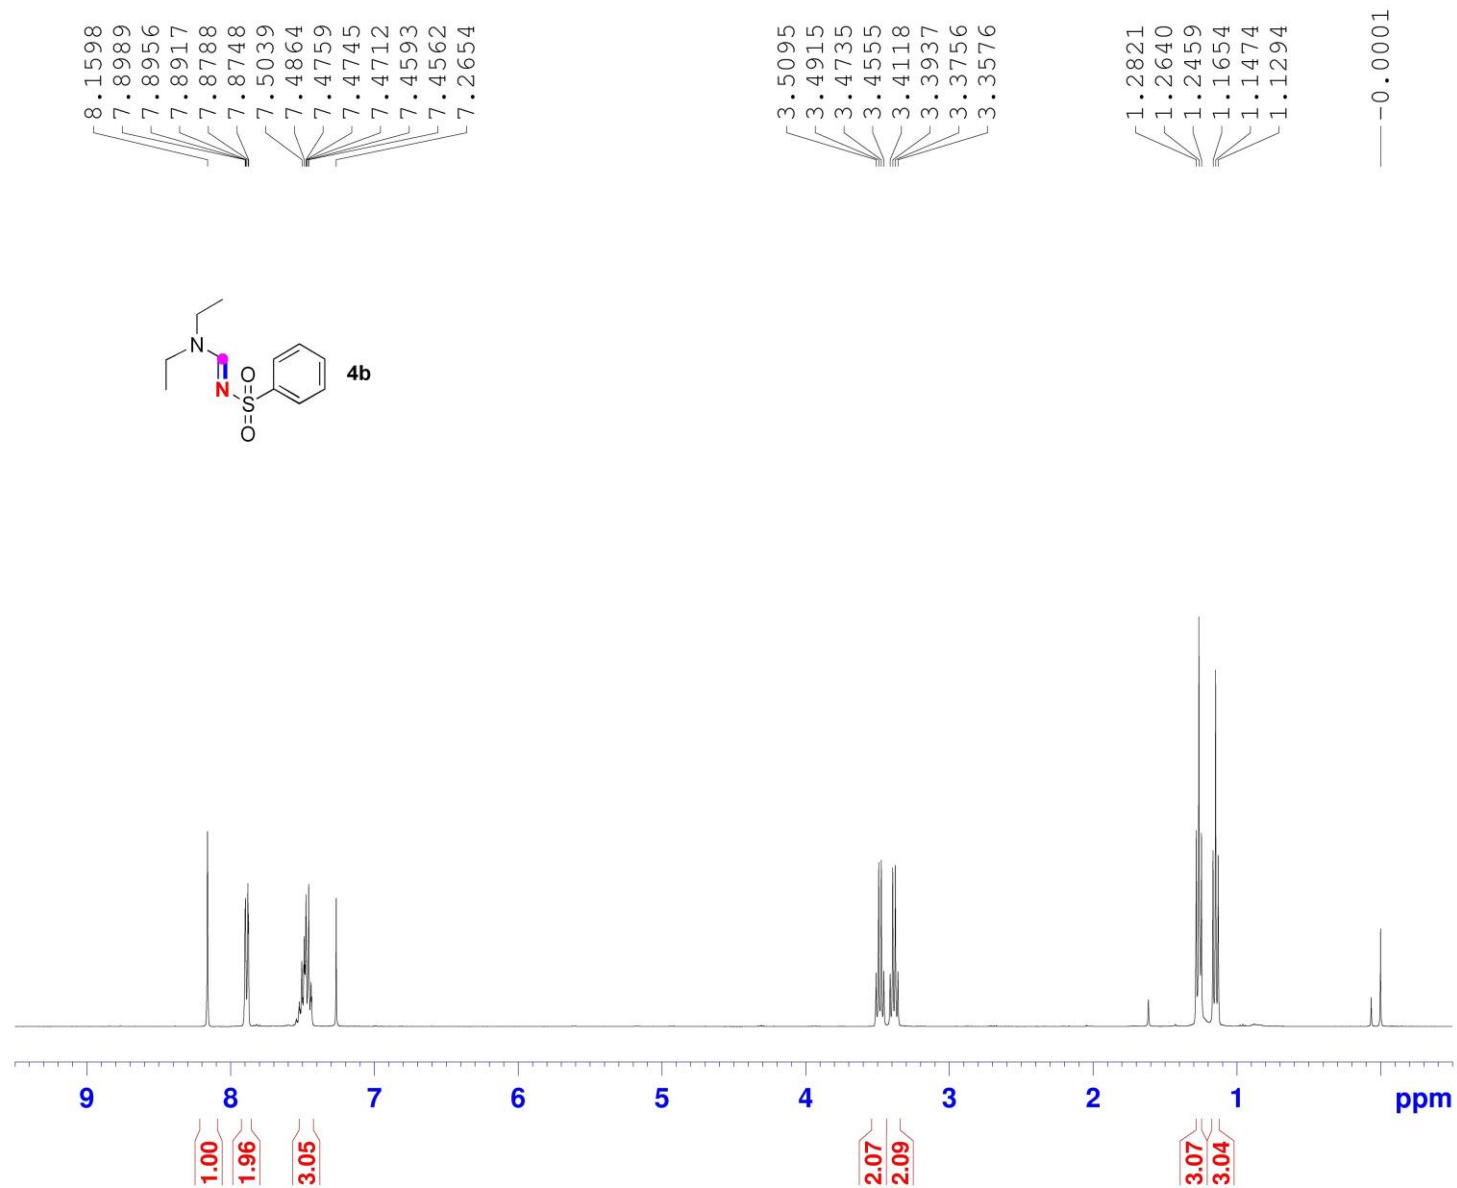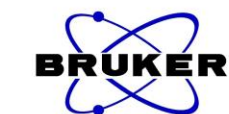

NAME CLJ-WL-S366  
 EXPNO 2  
 PROCNO 1  
 Date\_ 20190106  
 Time\_ 7.14  
 INSTRUM spect  
 PROBHD 5 mm PABBO BB/  
 PULPROG zg30  
 TD 65536  
 SOLVENT CDCl3  
 NS 12  
 DS 0  
 SWH 8012.820 Hz  
 FIDRES 0.122266 Hz  
 AQ 4.0894966 s  
 RG 77.71  
 DW 62.400 μs  
 DE 6.50 μs  
 TE 300.1 K  
 D1 1.00000000 s  
 TD0 1

===== CHANNEL f1 =====  
 SFO1 400.1324710 MHz  
 NUC1 1H  
 P1 8.04 μs  
 SI 65536  
 SF 400.1300075 MHz  
 WDW EM  
 SSB 0  
 LB 0.30 Hz  
 GB 0  
 PC 1.00

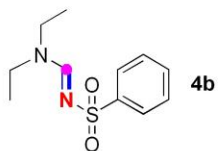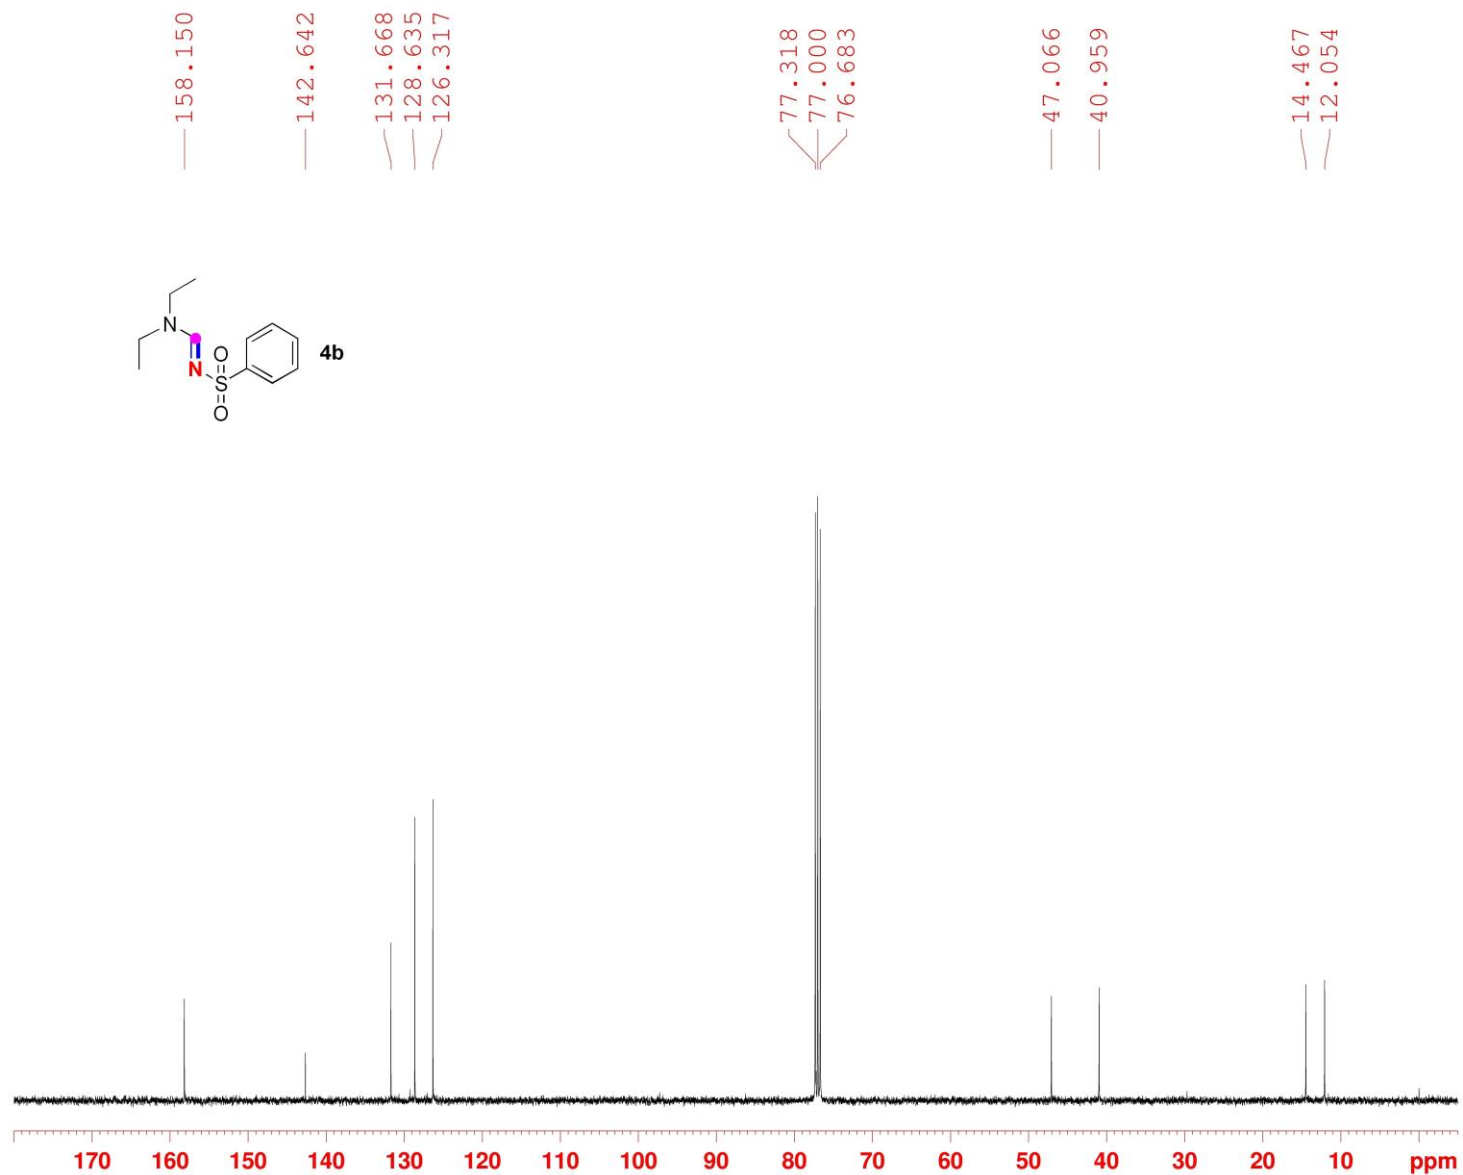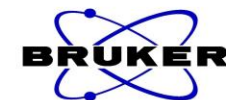

```

NAME      CLJ-WL-S366
EXPNO     1
PROCNO    1
Date_     20190106
Time      7.12
INSTRUM   spect
PROBHD    5 mm PABBO BB/
PULPROG   zgpg30
TD        65536
SOLVENT   CDCl3
NS        512
DS        0
SWH       24038.461 Hz
FIDRES    0.366798 Hz
AQ        1.3631988 sec
RG        194.26
DW        20.800 usec
DE        6.50 usec
TE        300.1 K
D1        2.00000000 sec
D11       0.03000000 sec
TD0       1
  
```

```

===== CHANNEL f1 =====
SFO1     100.6228293 MHz
NUC1     13C
P1       8.54 usec
SI       32768
SF       100.6127718 MHz
WDW      EM
SSB      0
LB       1.00 Hz
GB       0
PC       1.40
  
```

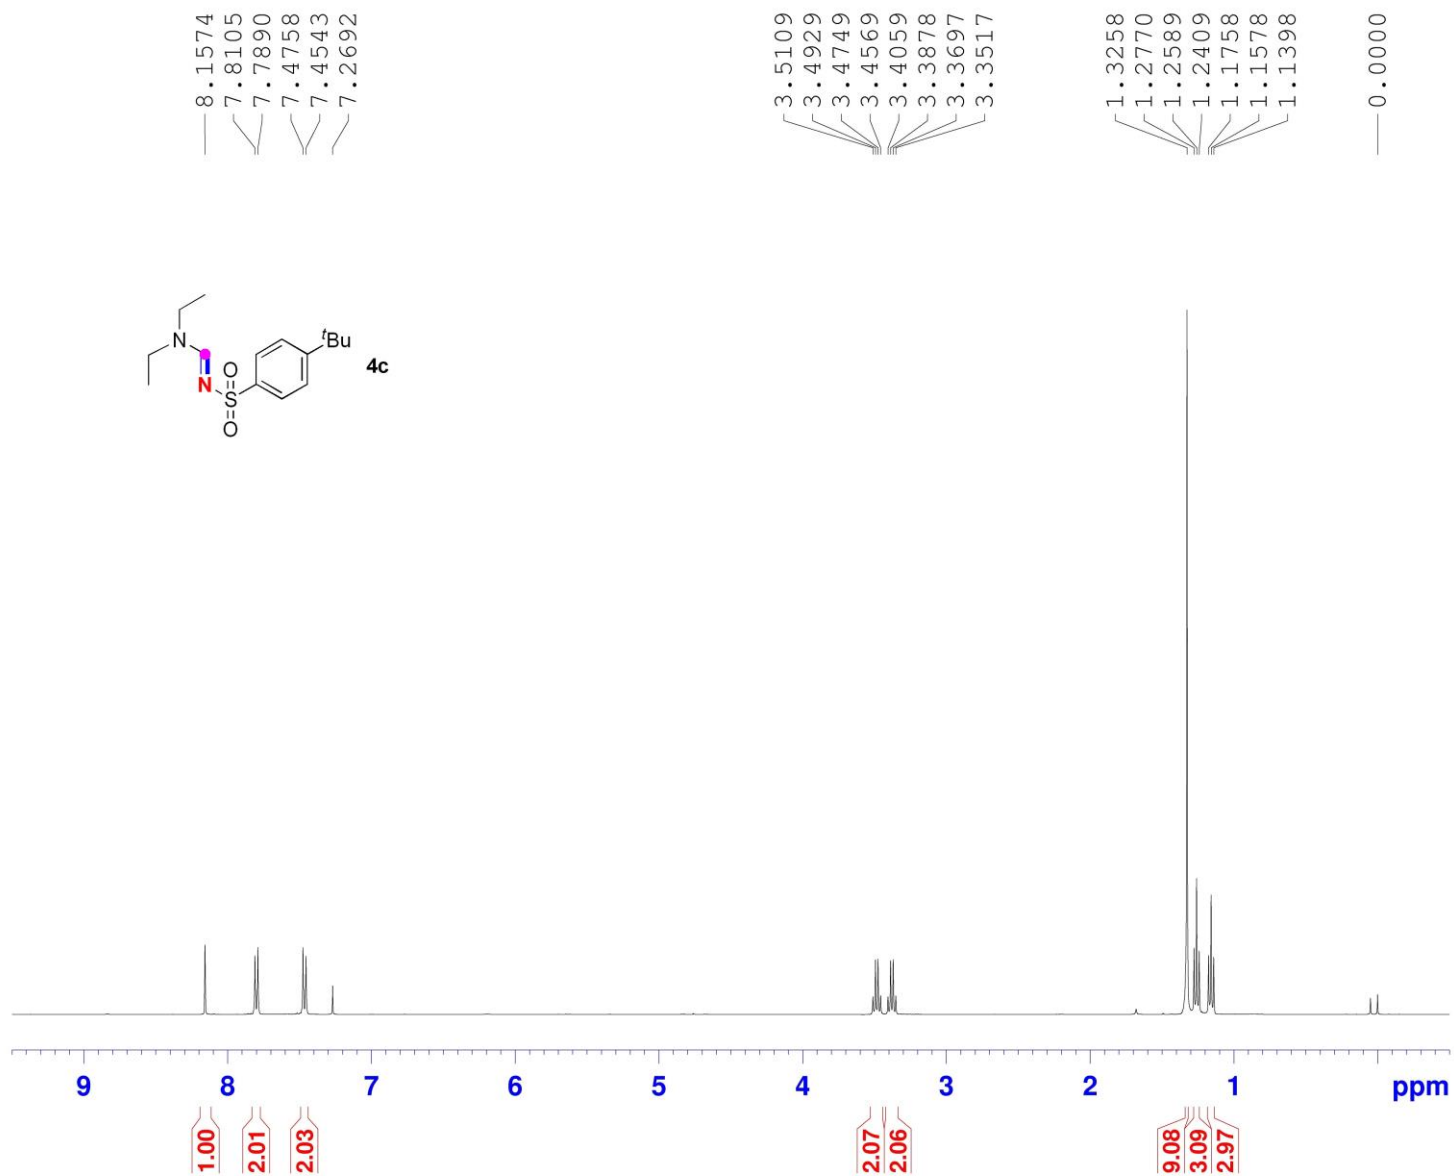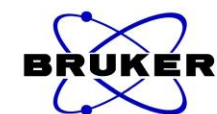

NAME CLJ-WL-S373  
 EXPNO 1  
 PROCNO 1  
 Date\_ 20190111  
 Time\_ 20.45  
 INSTRUM spect  
 PROBHD 5 mm PABBO BB/  
 PULPROG zg30  
 TD 65536  
 SOLVENT CDCl3  
 NS 12  
 DS 0  
 SWH 8012.820 Hz  
 FIDRES 0.122266 Hz  
 AQ 4.0894966 s  
 RG 51.19  
 DW 62.400 μs  
 DE 6.50 μs  
 TE 300.1 K  
 D1 1.00000000 s  
 TD0 1

===== CHANNEL f1 =====  
 SFO1 400.1324710 MHz  
 NUC1 1H  
 P1 8.04 μs  
 SI 65536  
 SF 400.1300058 MHz  
 WDW EM  
 SSB 0  
 LB 0.30 Hz  
 GB 0  
 PC 1.00

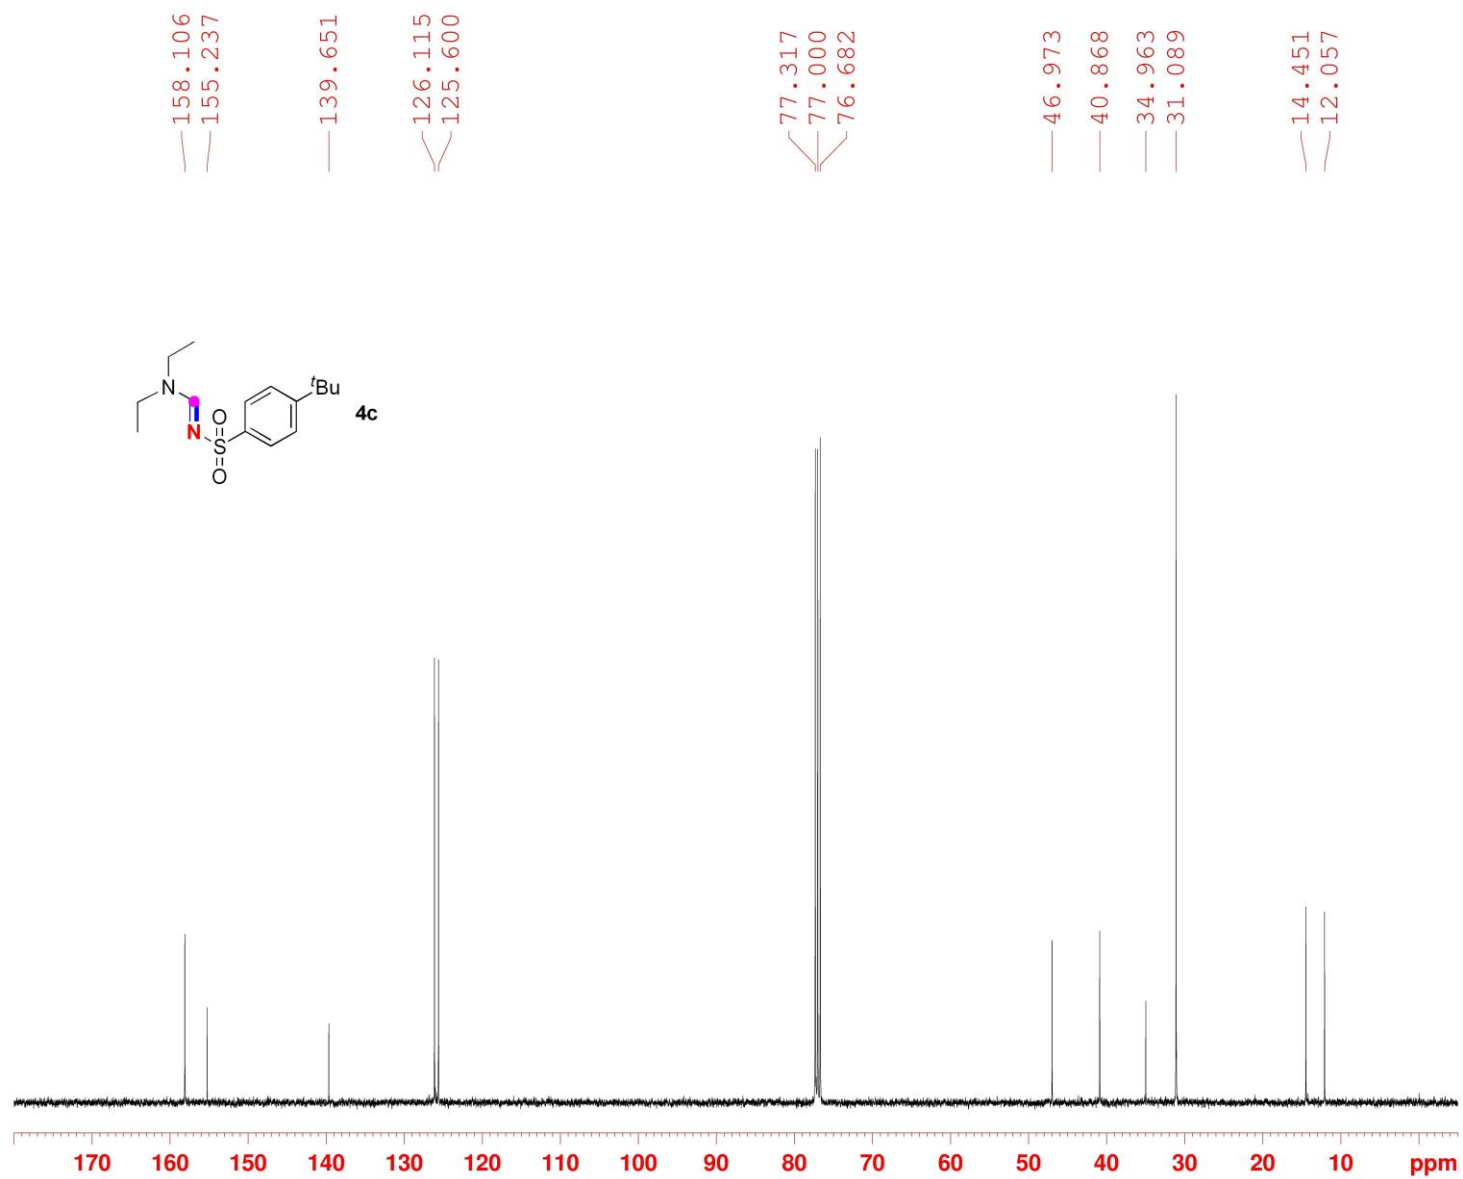

```

NAME          CLJ-WL-S373
EXPNO          2
PROCNO         1
Date_          20190111
Time           21.15
INSTRUM        spect
PROBHD         5 mm PABBO BB/
PULPROG        zgpg30
TD             65536
SOLVENT        CDCl3
NS             512
DS             0
SWH            24038.461 Hz
FIDRES         0.366798 Hz
AQ            1.3631988 sec
RG            194.26
DW            20.800 usec
DE            6.50 usec
TE            300.2 K
D1            2.00000000 sec
D11           0.03000000 sec
TD0           1

===== CHANNEL f1 =====
SFO1          100.6228293 MHz
NUC1          13C
P1            8.54 usec
SI            32768
SF            100.6127729 MHz
WDW           EM
SSB           0
LB            1.00 Hz
GB            0
PC            1.40

```

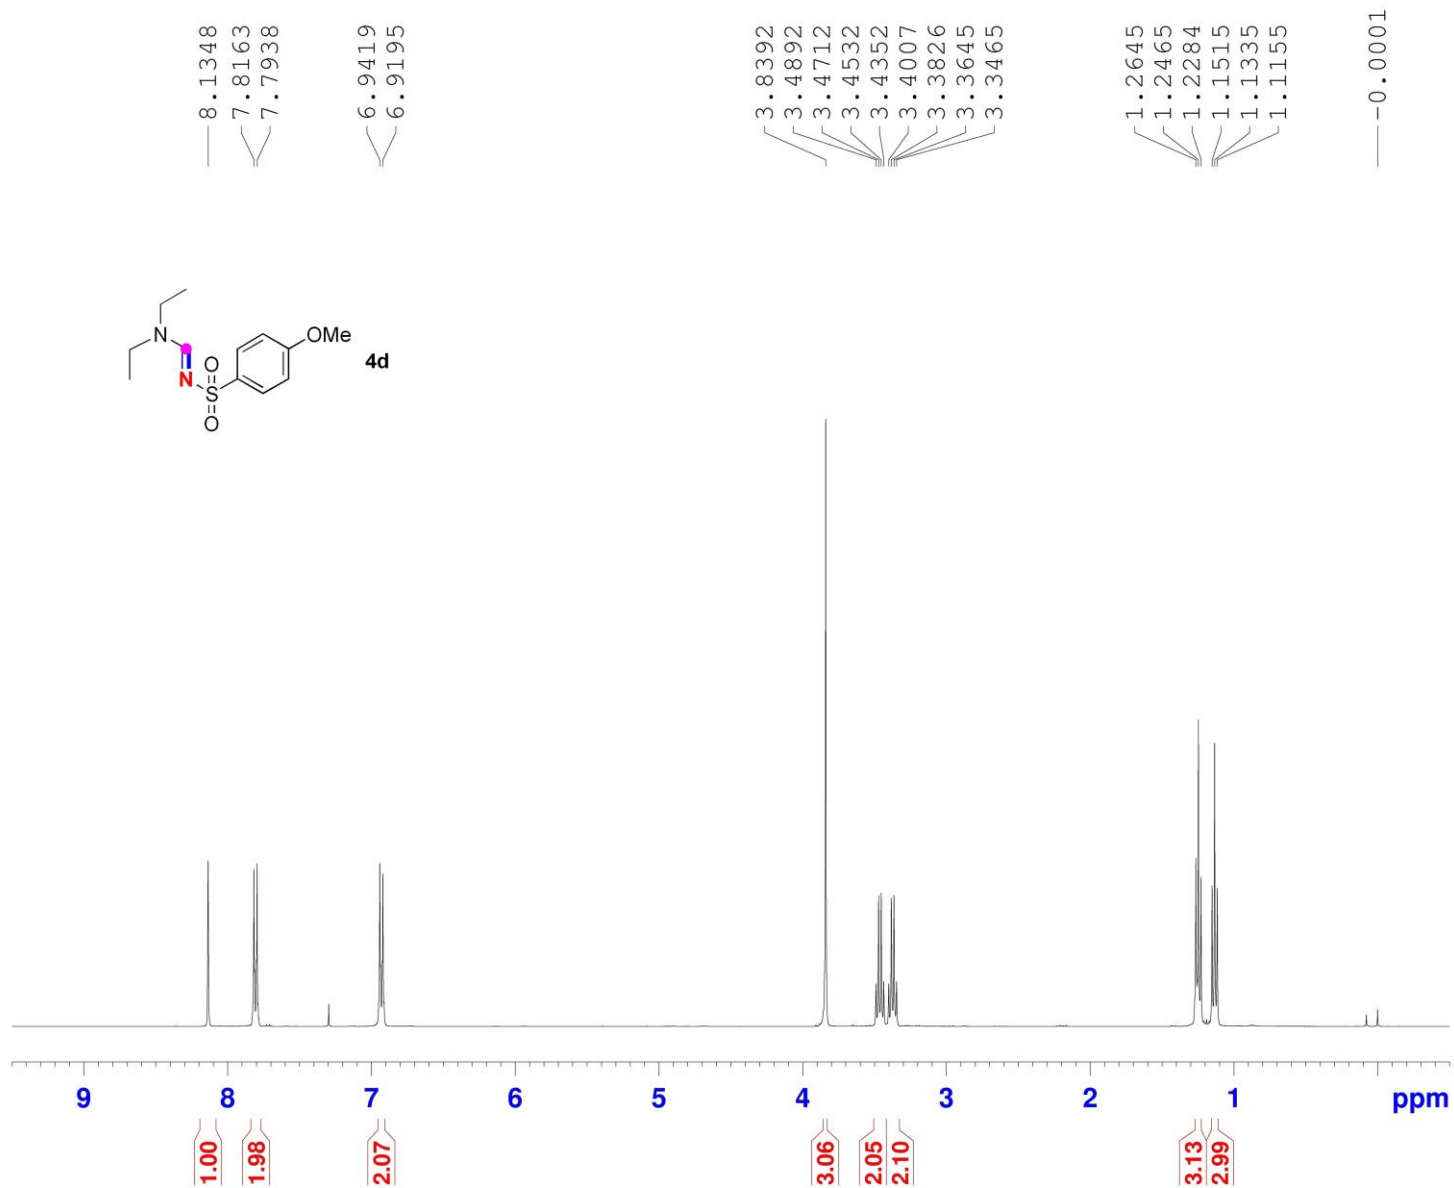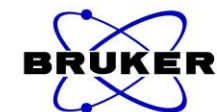

```

NAME      CLJ-WL-S375
EXPNO     2
PROCNO    1
Date_     20190113
Time      9.27
INSTRUM   spect
PROBHD    5 mm PABBO BB/
PULPROG   zg30
TD         65536
SOLVENT   CDC13
NS         12
DS         0
SWH        8012.820 Hz
FIDRES     0.122266 Hz
AQ         4.0894966 s
RG         21.11
DW         62.400 ns
DE         6.50 ns
TE         300.1 K
D1         1.00000000 s
TD0        1
  
```

```

===== CHANNEL f1 =====
SFO1      400.1324710 MHz
NUC1      1H
P1        8.04 ns
SI        65536
SF        400.1299947 MHz
WDW       EM
SSB       0
LB        0.30 Hz
GB        0
PC        1.00
  
```

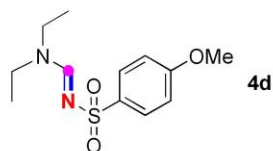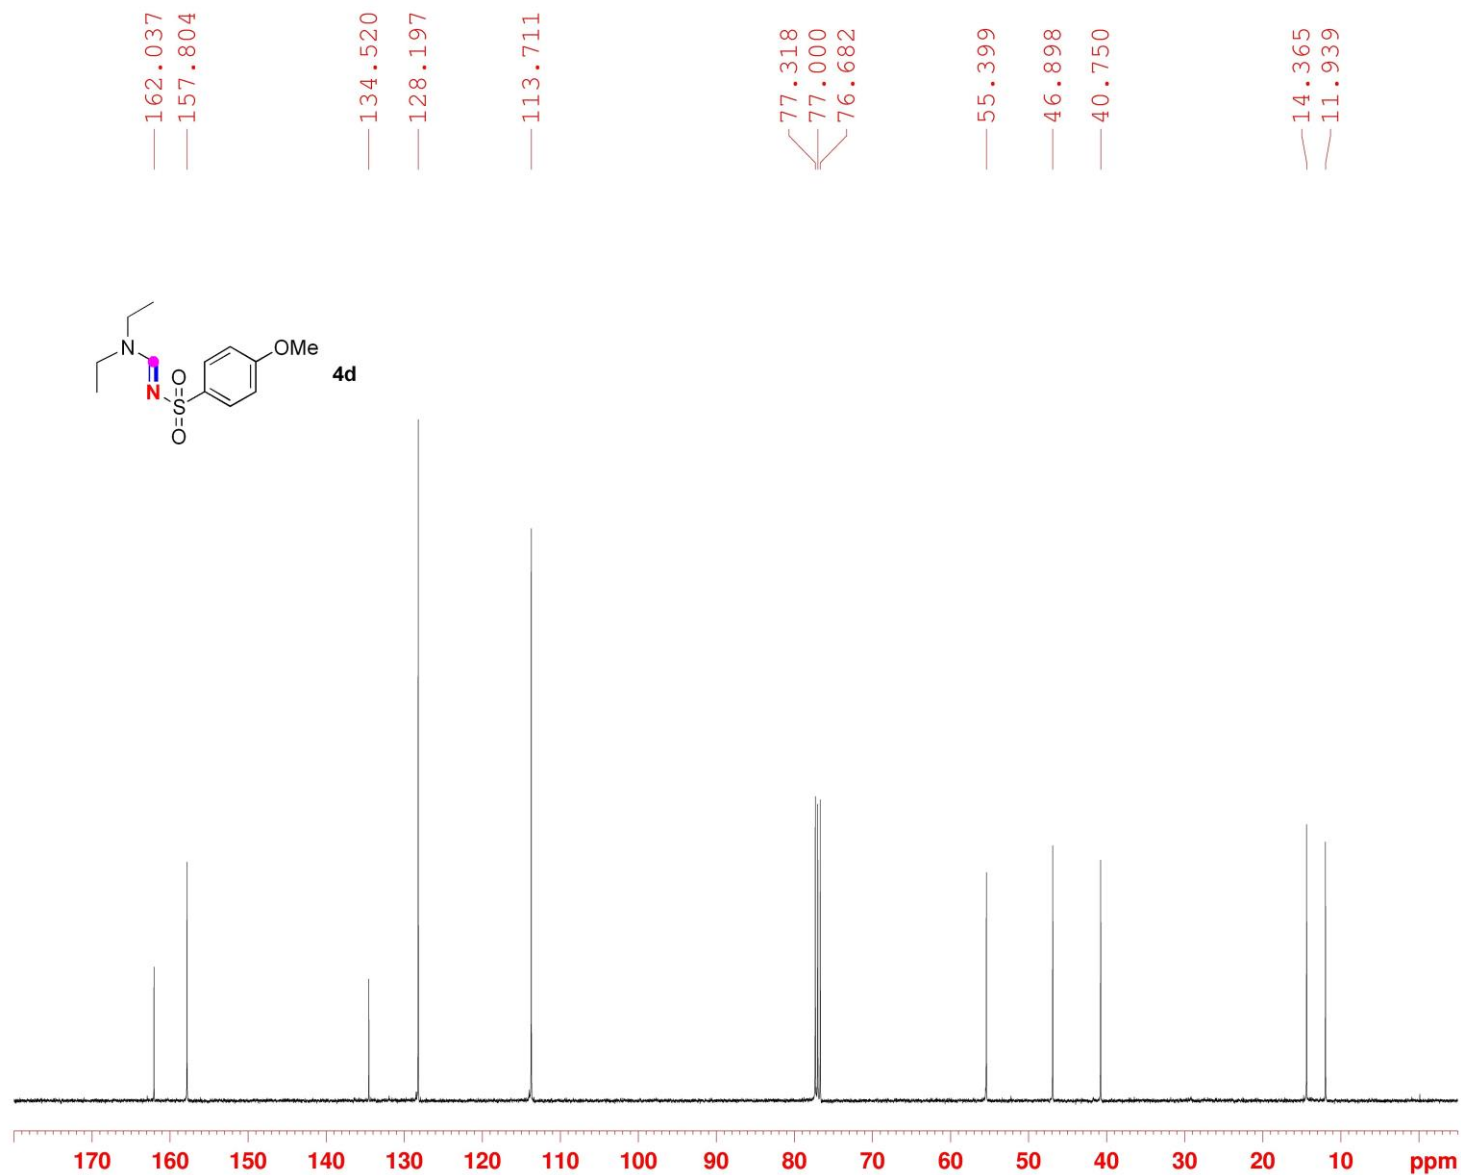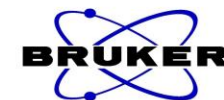

```

NAME          CLJ-WL-S375
EXPNO         1
PROCNO        1
Date_         20190113
Time          9.25
INSTRUM       spect
PROBHD        5 mm PABBO BB/
PULPROG       zgpg30
TD            65536
SOLVENT       CDCl3
NS            512
DS            0
SWH           24038.461 Hz
FIDRES        0.366798 Hz
AQ            1.3631988 sec
RG            194.26
DW            20.800 usec
DE            6.50 usec
TE            300.1 K
D1            2.00000000 sec
D11           0.03000000 sec
TD0           1
  
```

```

===== CHANNEL f1 =====
SFO1          100.6228293 MHz
NUC1          13C
P1            8.54 usec
SI            32768
SF            100.6127808 MHz
WDW           EM
SSB           0
LB            1.00 Hz
GB            0
PC            1.40
  
```

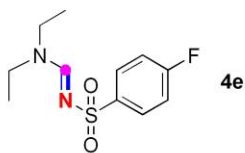

8.1521  
7.8974  
7.8845  
7.8754  
7.8625  
7.1599  
7.1493  
7.1384  
7.1278  
7.1062

3.5038  
3.4858  
3.4678  
3.4498  
3.4276  
3.4096  
3.3915  
3.3734

1.2848  
1.2667  
1.2487  
1.1625  
1.1445  
1.1265

— 0.0000

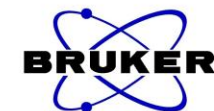

NAME CLJ-WL-S374  
EXPNO 1  
PROCNO 1  
Date\_ 20190111  
Time\_ 21.20  
INSTRUM spect  
PROBHD 5 mm PABBO BB/  
PULPROG zg30  
TD 65536  
SOLVENT CDC13  
NS 12  
DS 0  
SWH 8012.820 Hz  
FIDRES 0.122266 Hz  
AQ 4.0894966 s  
RG 41.07  
DW 62.400 us  
DE 6.50 us  
TE 300.2 K  
D1 1.00000000 s  
TD0 1

===== CHANNEL f1 =====  
SF01 400.1324710 MHz  
NUC1 1H  
P1 8.04 us  
SI 65536  
SF 400.1300013 MHz  
WDW EM  
SSB 0  
LB 0.30 Hz  
GB 0  
PC 1.00

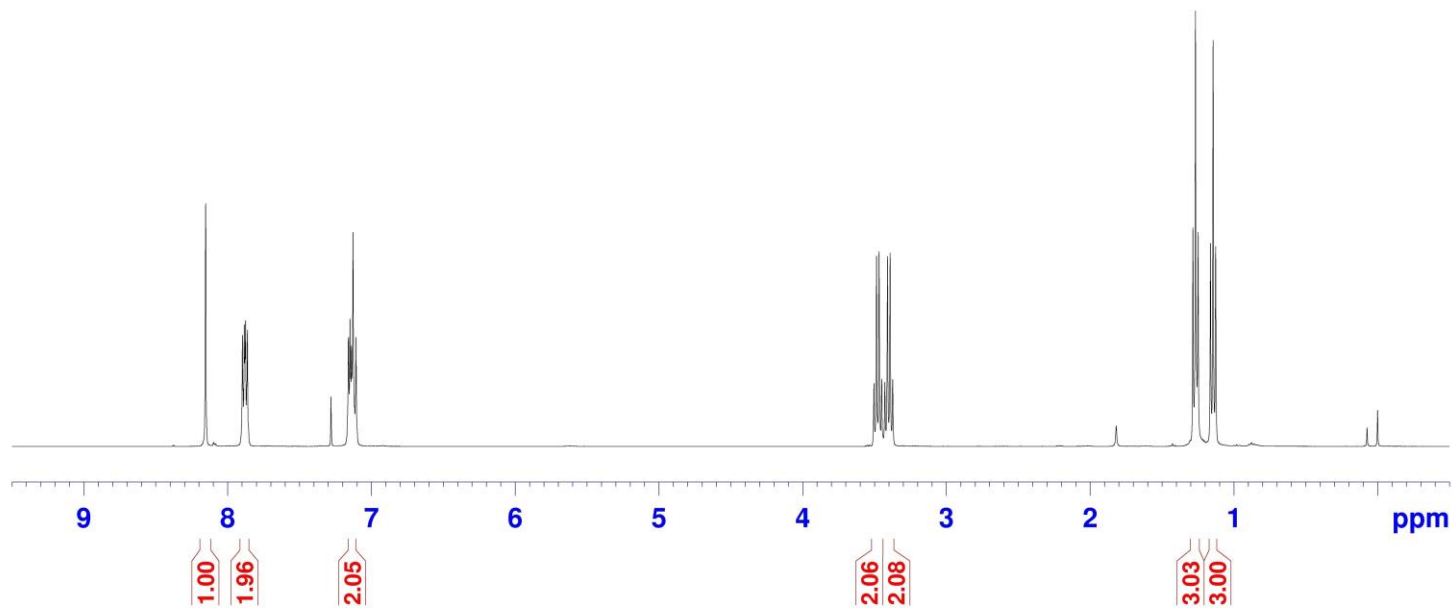

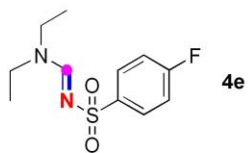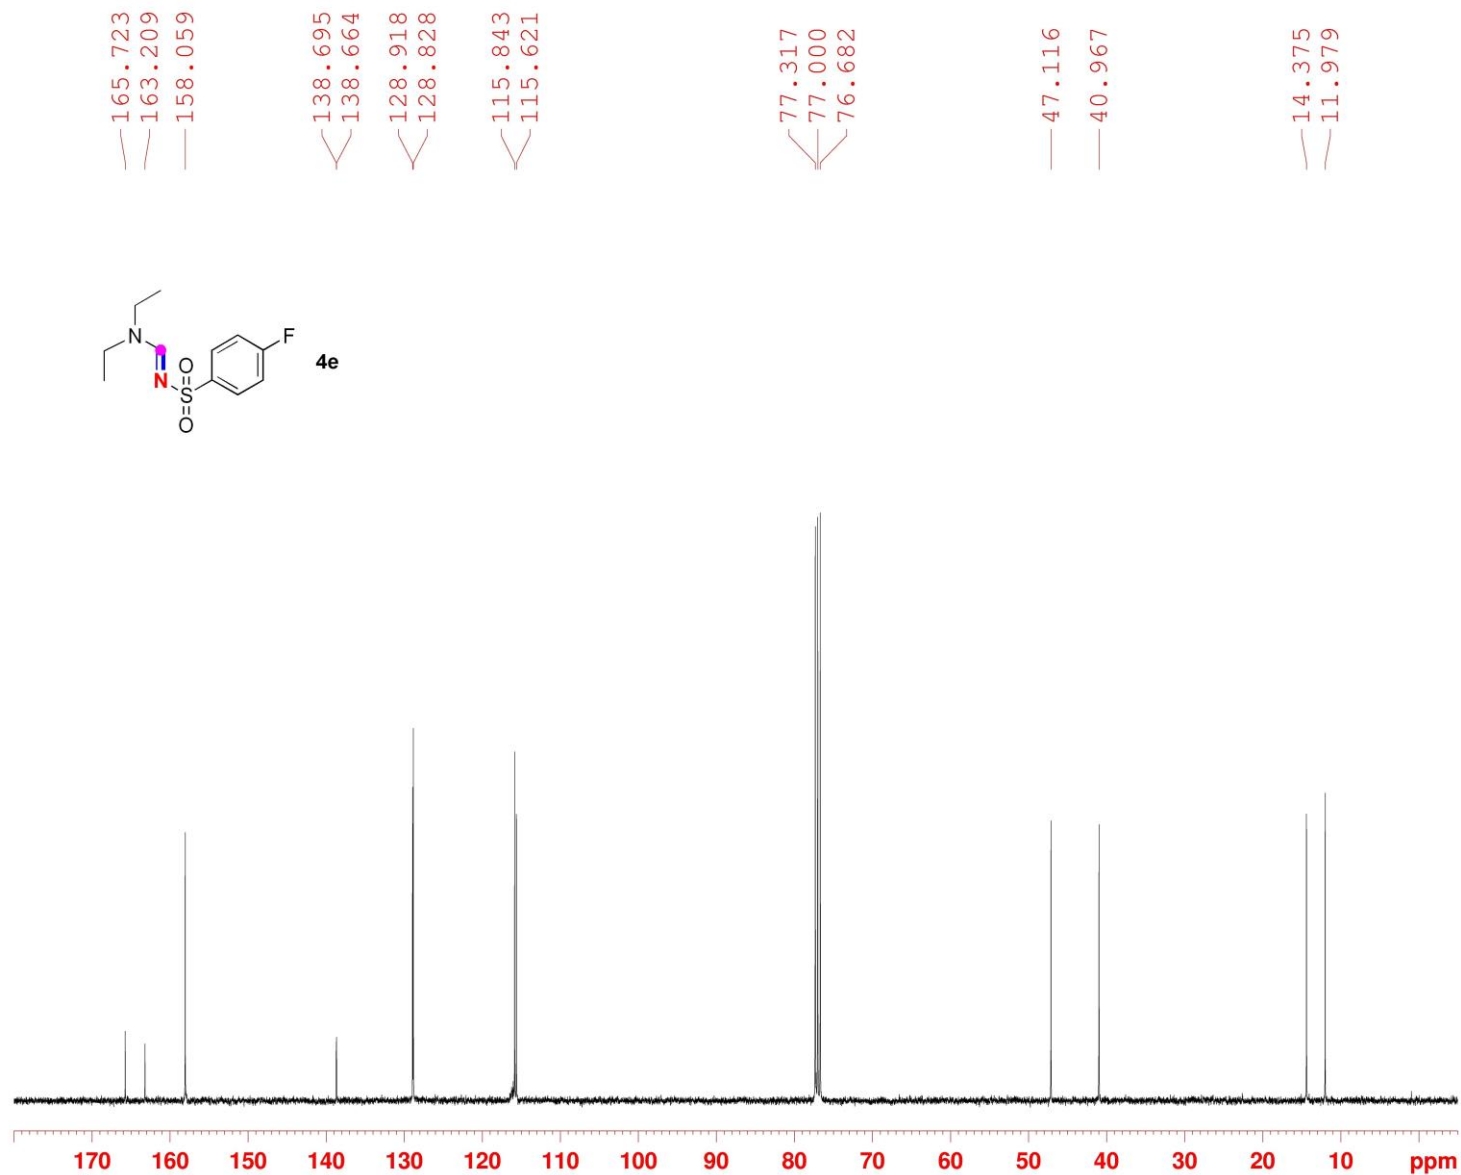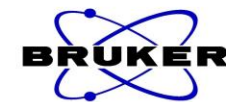

```

NAME      CLJ-WL-S374
EXPNO     2
PROCNO    1
Date_     20190111
Time      21.50
INSTRUM    spect
PROBHD     5 mm PABBO BB/
PULPROG    zgpg30
TD         65536
SOLVENT    CDCl3
NS         512
DS         0
SWH        24038.461 Hz
FIDRES     0.366798 Hz
AQ         1.3631988 sec
RG         194.26
DW         20.800 usec
DE         6.50 usec
TE         300.1 K
D1         2.00000000 sec
D11        0.03000000 sec
TD0        1
  
```

```

===== CHANNEL f1 =====
SFO1      100.6228293 MHz
NUC1      13C
P1        8.54 usec
SI        32768
SF        100.6127759 MHz
WDW       EM
SSB       0
LB        1.00 Hz
GB        0
PC        1.40
  
```

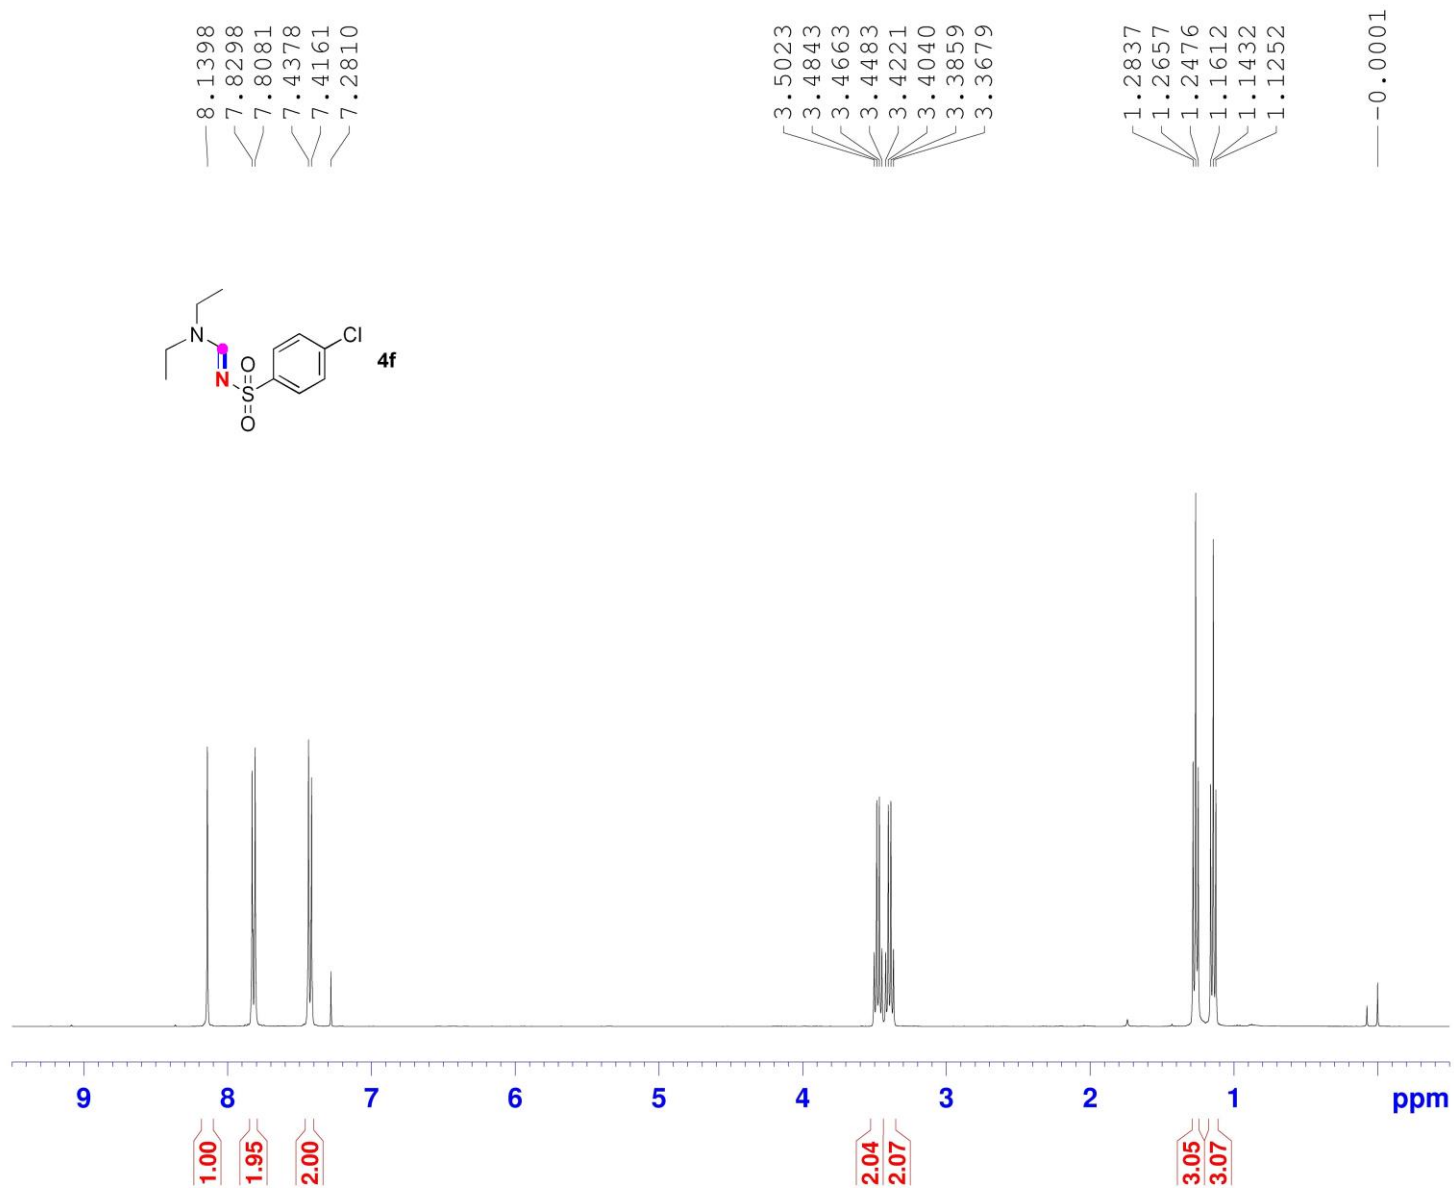

NAME CLJ-WL-S376  
 EXPNO 2  
 PROCNO 1  
 Date\_ 20190113  
 Time\_ 10.27  
 INSTRUM spect  
 PROBHD 5 mm PABBO BB/  
 PULPROG zg30  
 TD 65536  
 SOLVENT CDCl<sub>3</sub>  
 NS 12  
 DS 0  
 SWH 8012.820 Hz  
 FIDRES 0.122266 Hz  
 AQ 4.0894966 s  
 RG 47.53  
 DW 62.400 μs  
 DE 6.50 μs  
 TE 300.1 K  
 D1 1.00000000 s  
 TD0 1

===== CHANNEL f1 =====  
 SFO1 400.1324710 MHz  
 NUC1 1H  
 P1 8.04 μs  
 SI 65536  
 SF 400.1300011 MHz  
 WDW EM  
 SSB 0  
 LB 0.30 Hz  
 GB 0  
 PC 1.00

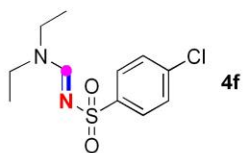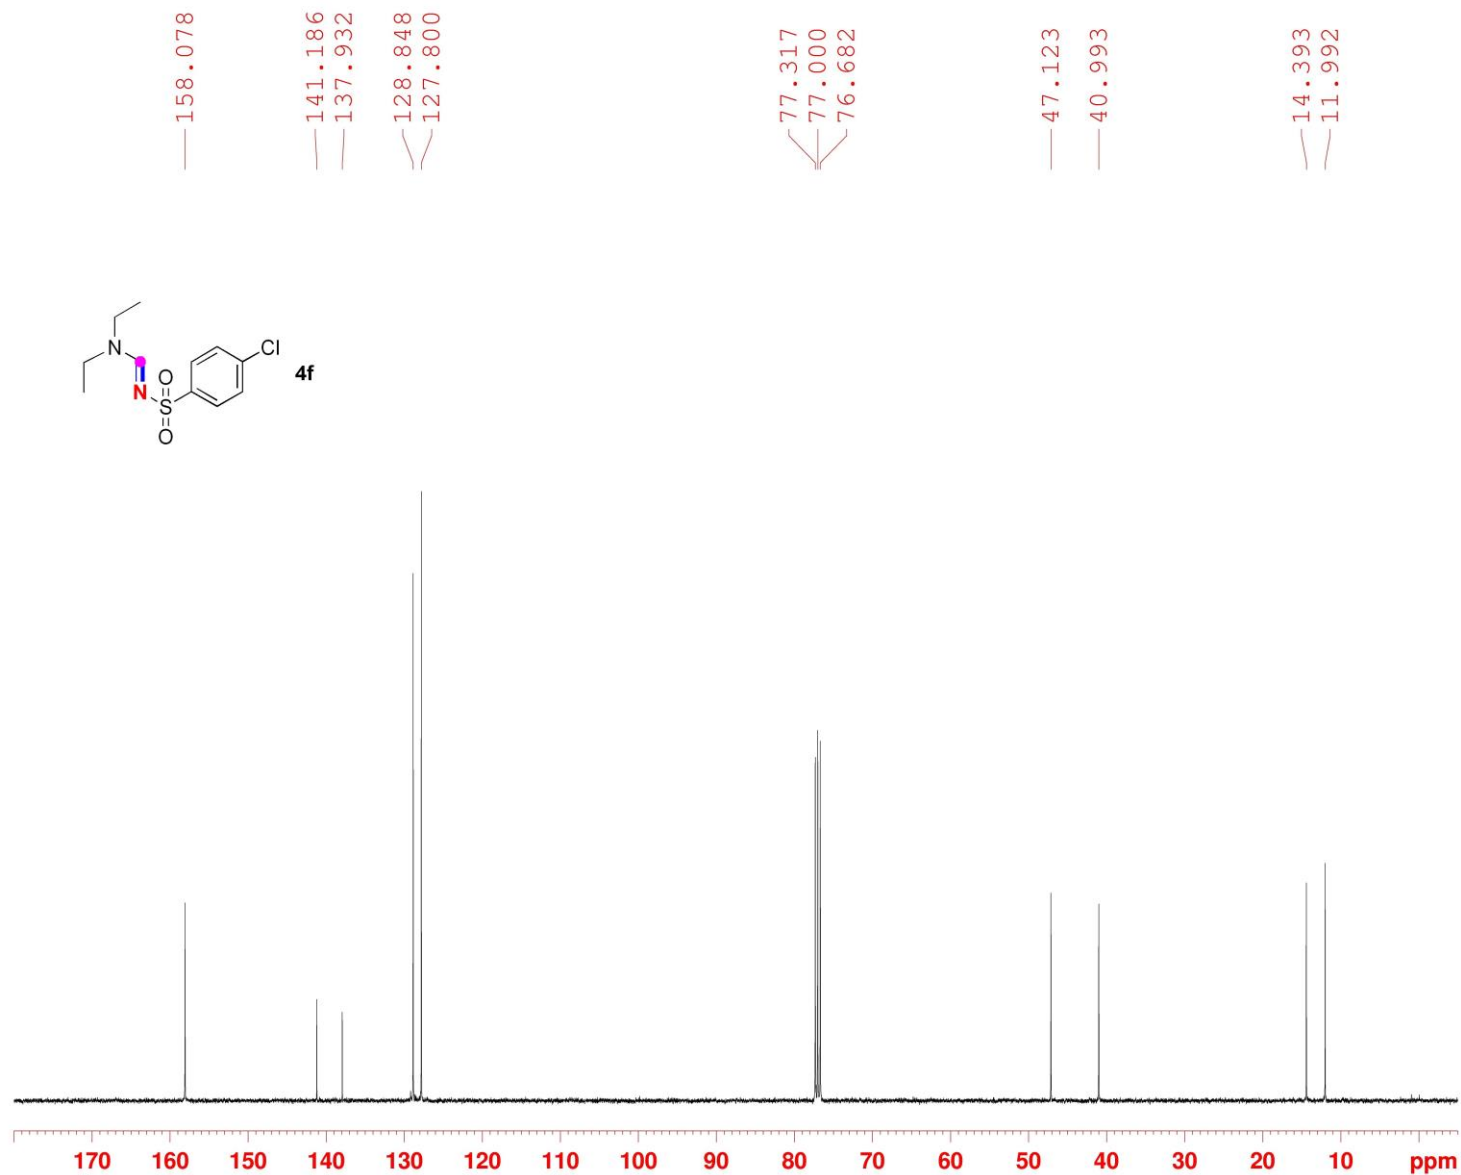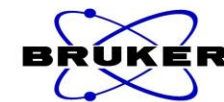

```

NAME      CLJ-WL-S376
EXPNO     1
PROCNO    1
Date_     20190113
Time      10.00
INSTRUM    spect
PROBHD     5 mm PABBO BB/
PULPROG    zgpg30
TD         65536
SOLVENT    CDCl3
NS         512
DS         0
SWH        24038.461 Hz
FIDRES     0.366798 Hz
AQ         1.3631988 sec
RG         194.26
DW         20.800 usec
DE         6.50 usec
TE         300.2 K
D1         2.00000000 sec
D11        0.03000000 sec
TD0        1
  
```

```

===== CHANNEL f1 =====
SFO1      100.6228293 MHz
NUC1      13C
P1        8.54 usec
SI        32768
SF        100.6127760 MHz
WDW       EM
SSB       0
LB        1.00 Hz
GB        0
PC        1.40
  
```

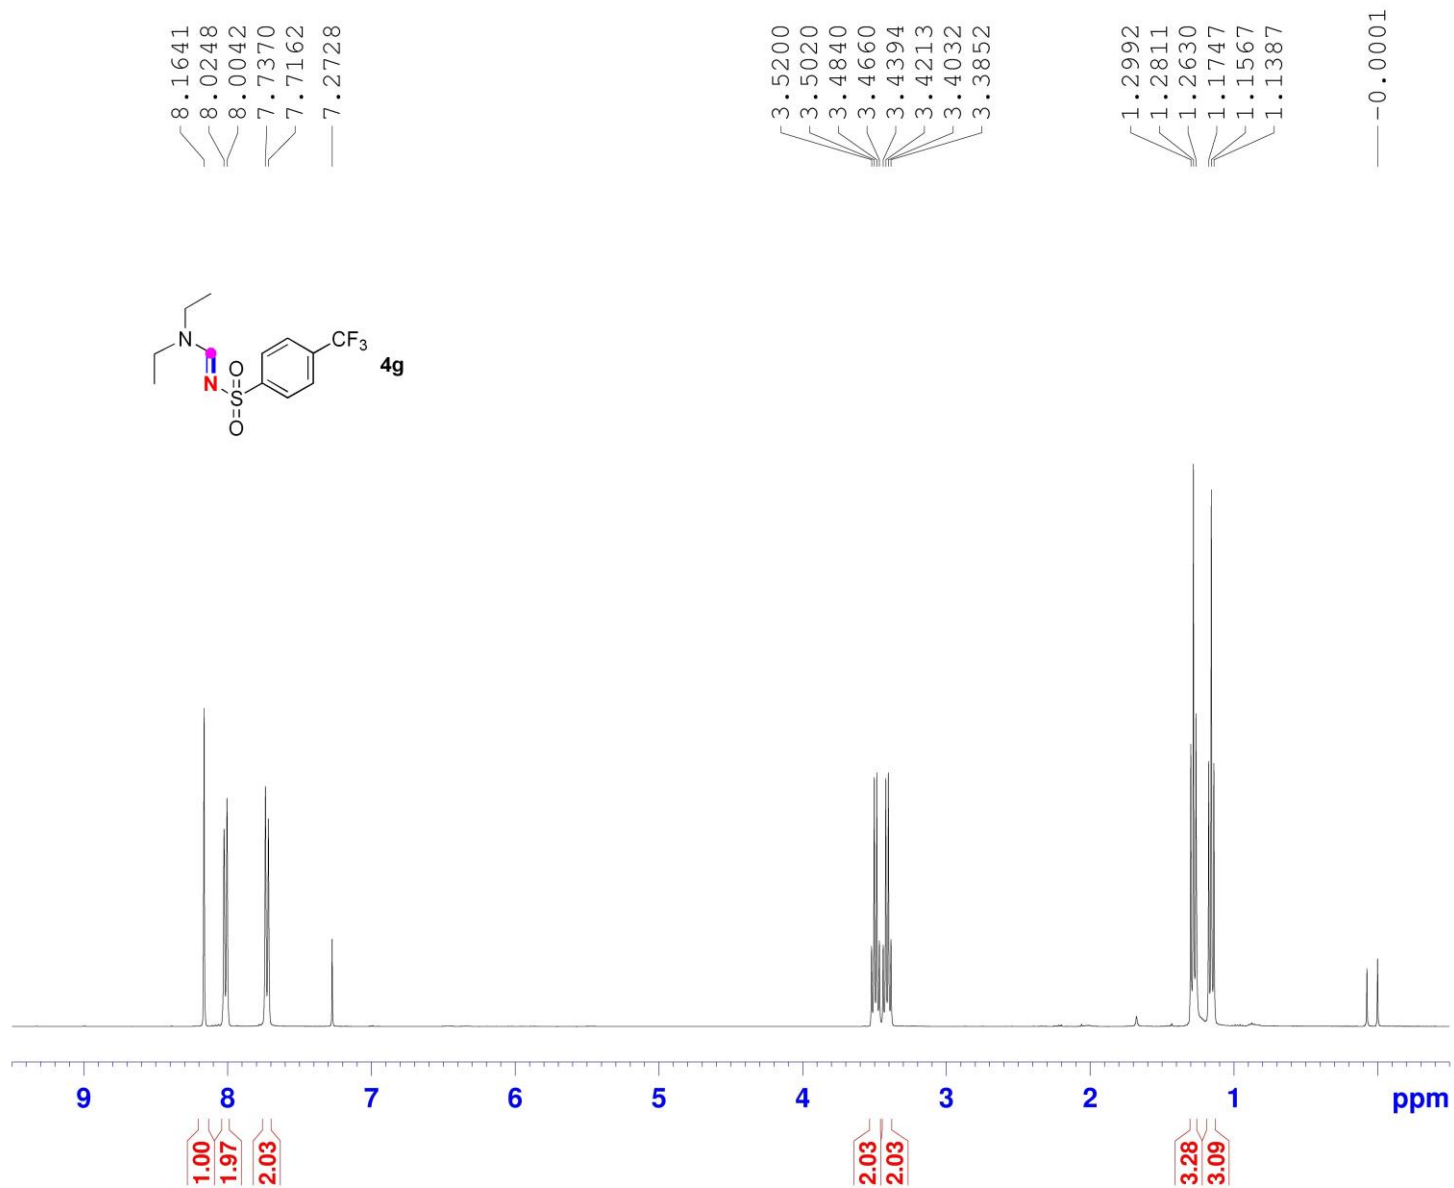

NAME CLJ-WL-S377  
 EXPNO 2  
 PROCNO 1  
 Date\_ 20190113  
 Time 12.42  
 INSTRUM spect  
 PROBHD 5 mm PABBO BB/  
 PULPROG zg30  
 TD 65536  
 SOLVENT CDCl3  
 NS 12  
 DS 0  
 SWH 8012.820 Hz  
 FIDRES 0.122266 Hz  
 AQ 4.0894966 s  
 RG 57.79  
 DW 62.400 us  
 DE 6.50 us  
 TE 300.1 K  
 D1 1.00000000 s  
 TD0 1

===== CHANNEL f1 =====  
 SFO1 400.1324710 MHz  
 NUC1 1H  
 P1 8.04 us  
 SI 65536  
 SF 400.1300042 MHz  
 WDW EM  
 SSB 0  
 LB 0.30 Hz  
 GB 0  
 PC 1.00

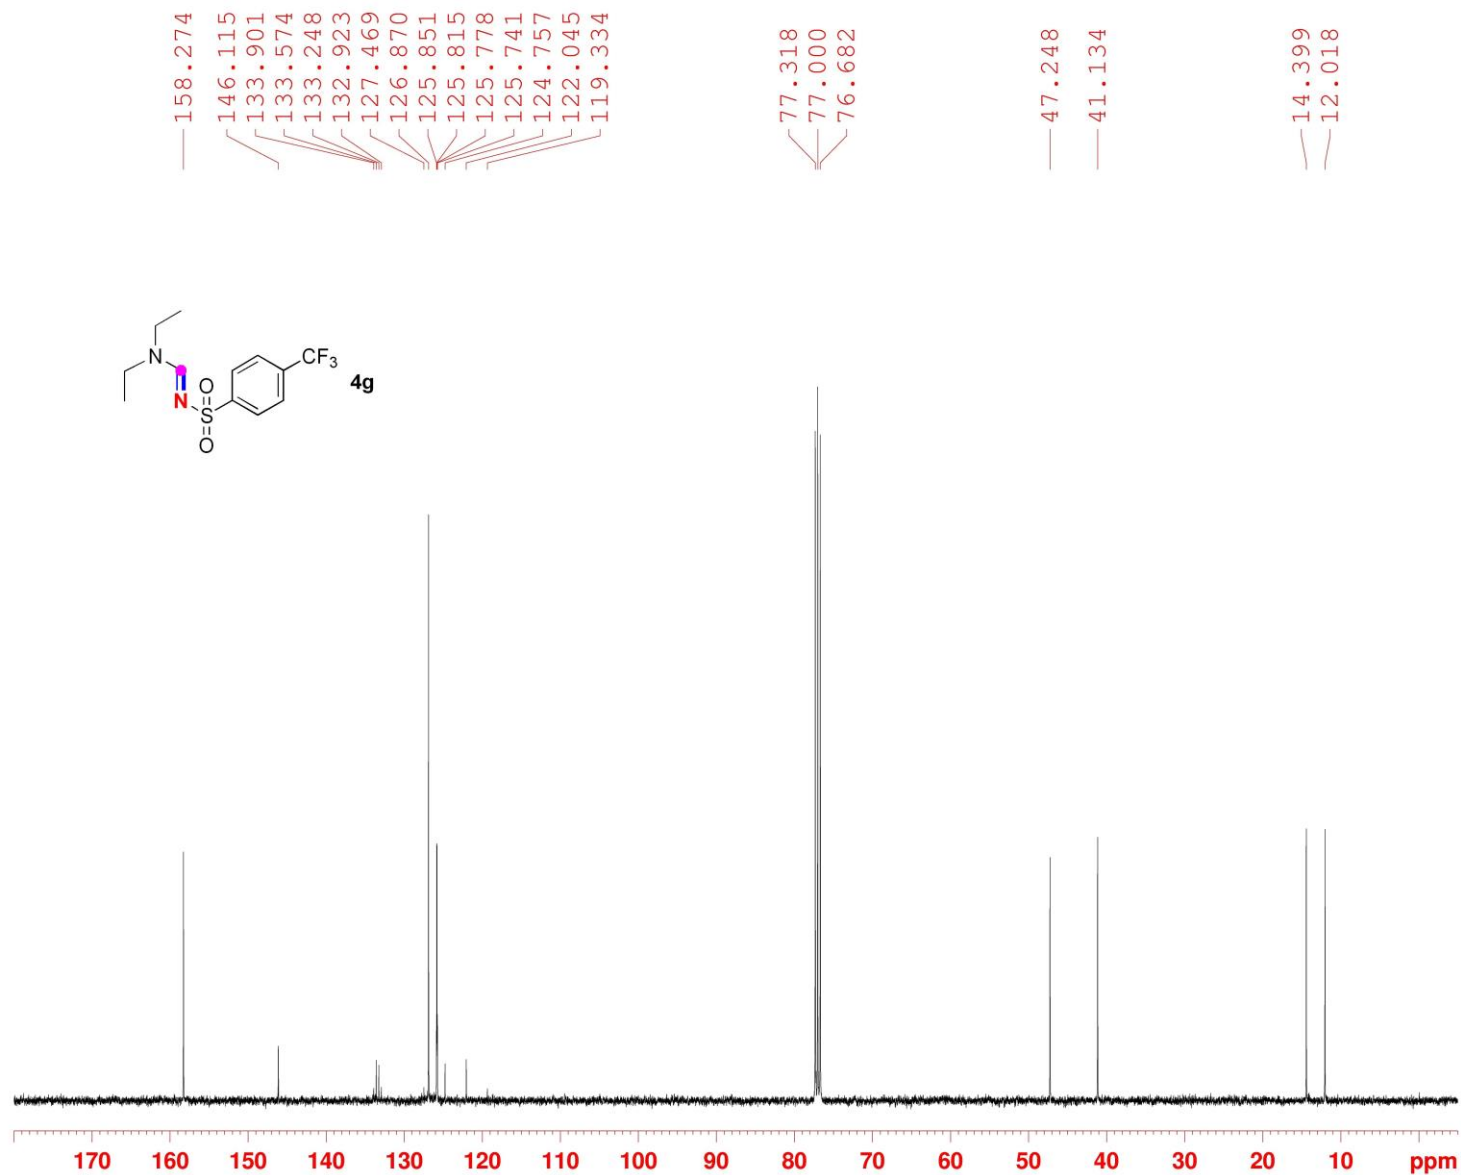

```

NAME          CLJ-WL-S377
EXPNO          1
PROCNO         1
Date_          20190113
Time           11.21
INSTRUM        spect
PROBHD         5 mm PABBO BB/
PULPROG        zgpg30
TD             65536
SOLVENT        CDCl3
NS             512
DS             0
SWH            24038.461 Hz
FIDRES         0.366798 Hz
AQ             1.3631988 sec
RG            194.26
DW            20.800 usec
DE             6.50 usec
TE             300.2 K
D1            2.00000000 sec
D11           0.03000000 sec
TD0            1

===== CHANNEL f1 =====
SFO1          100.6228293 MHz
NUC1           13C
P1             8.54 usec
SI            32768
SF            100.6127724 MHz
WDW            EM
SSB            0
LB             1.00 Hz
GB            0
PC             1.40

```

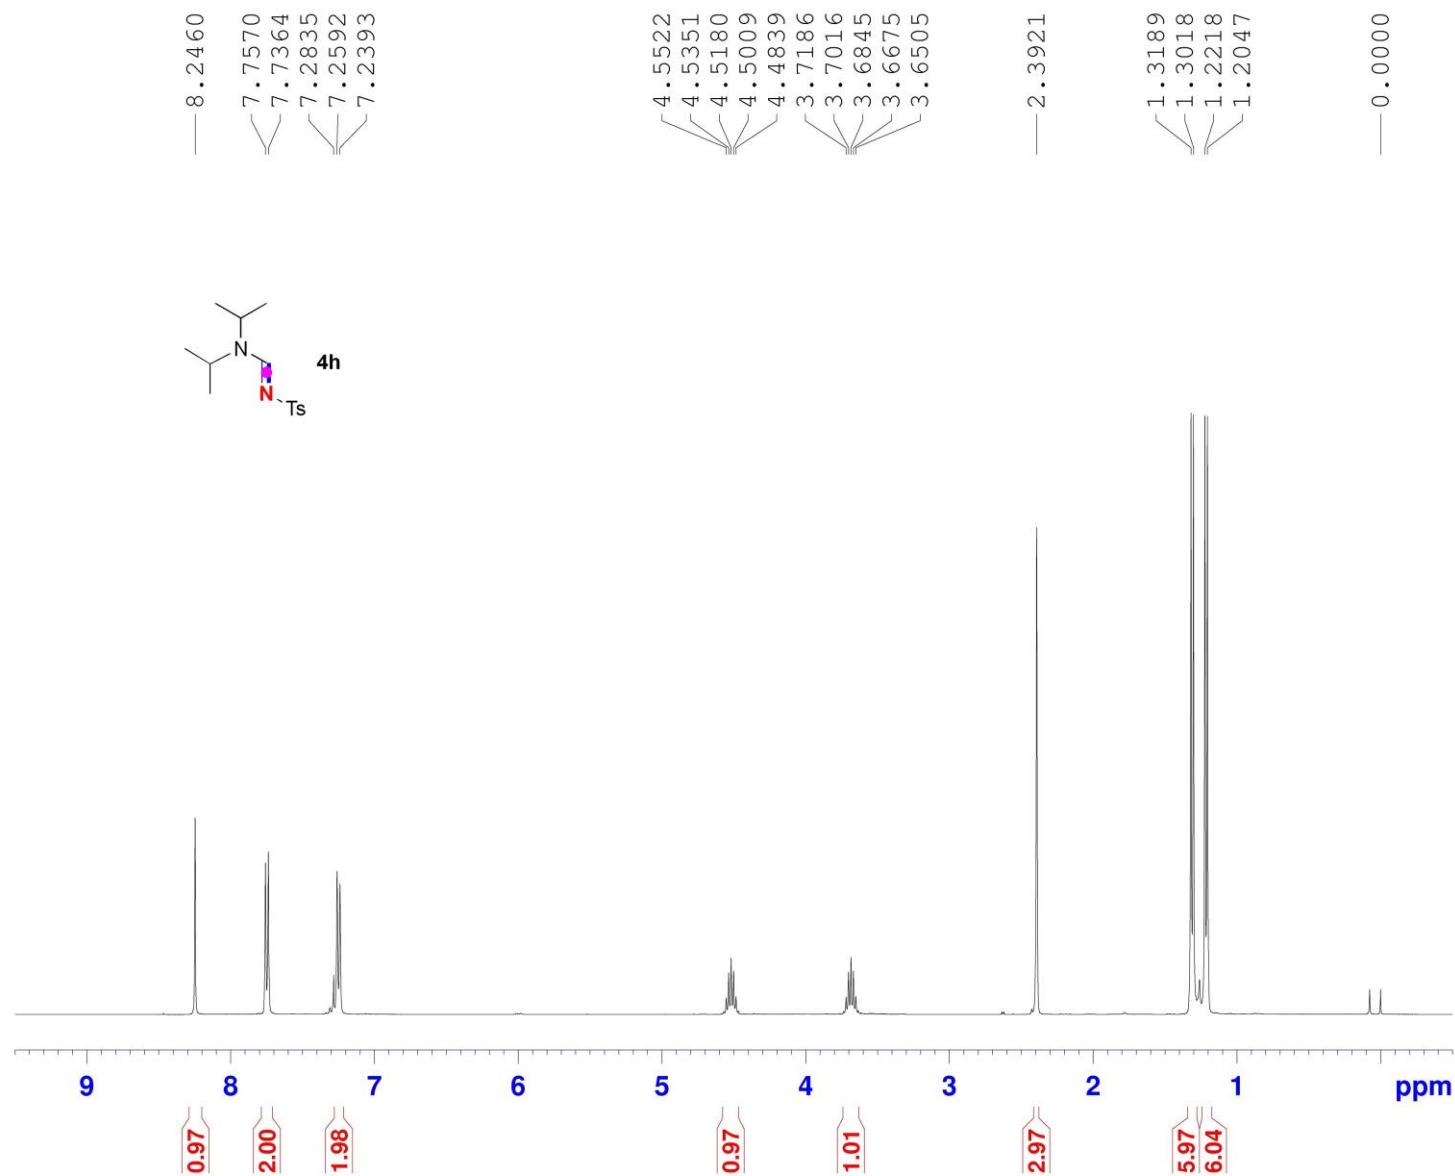

```

NAME      CLJ-WL-S368
EXPNO     1
PROCNO    1
Date_     20190109
Time      8.10
INSTRUM   spect
PROBHD    5 mm PABBO BB/
PULPROG   zg30
TD         65536
SOLVENT   CDC13
NS         12
DS         0
SWH        8012.820 Hz
FIDRES     0.122266 Hz
AQ         4.0894966 s
RG         21.11
DW         62.400 ns
DE         6.50 ns
TE         300.2 K
D1         1.00000000 s
TD0        1
  
```

```

===== CHANNEL f1 =====
SFO1      400.1324710 MHz
NUC1      1H
P1         8.04 ns
SI         65536
SF         400.1299999 MHz
WDW        EM
SSB        0
LB         0.30 Hz
GB         0
PC         1.00
  
```

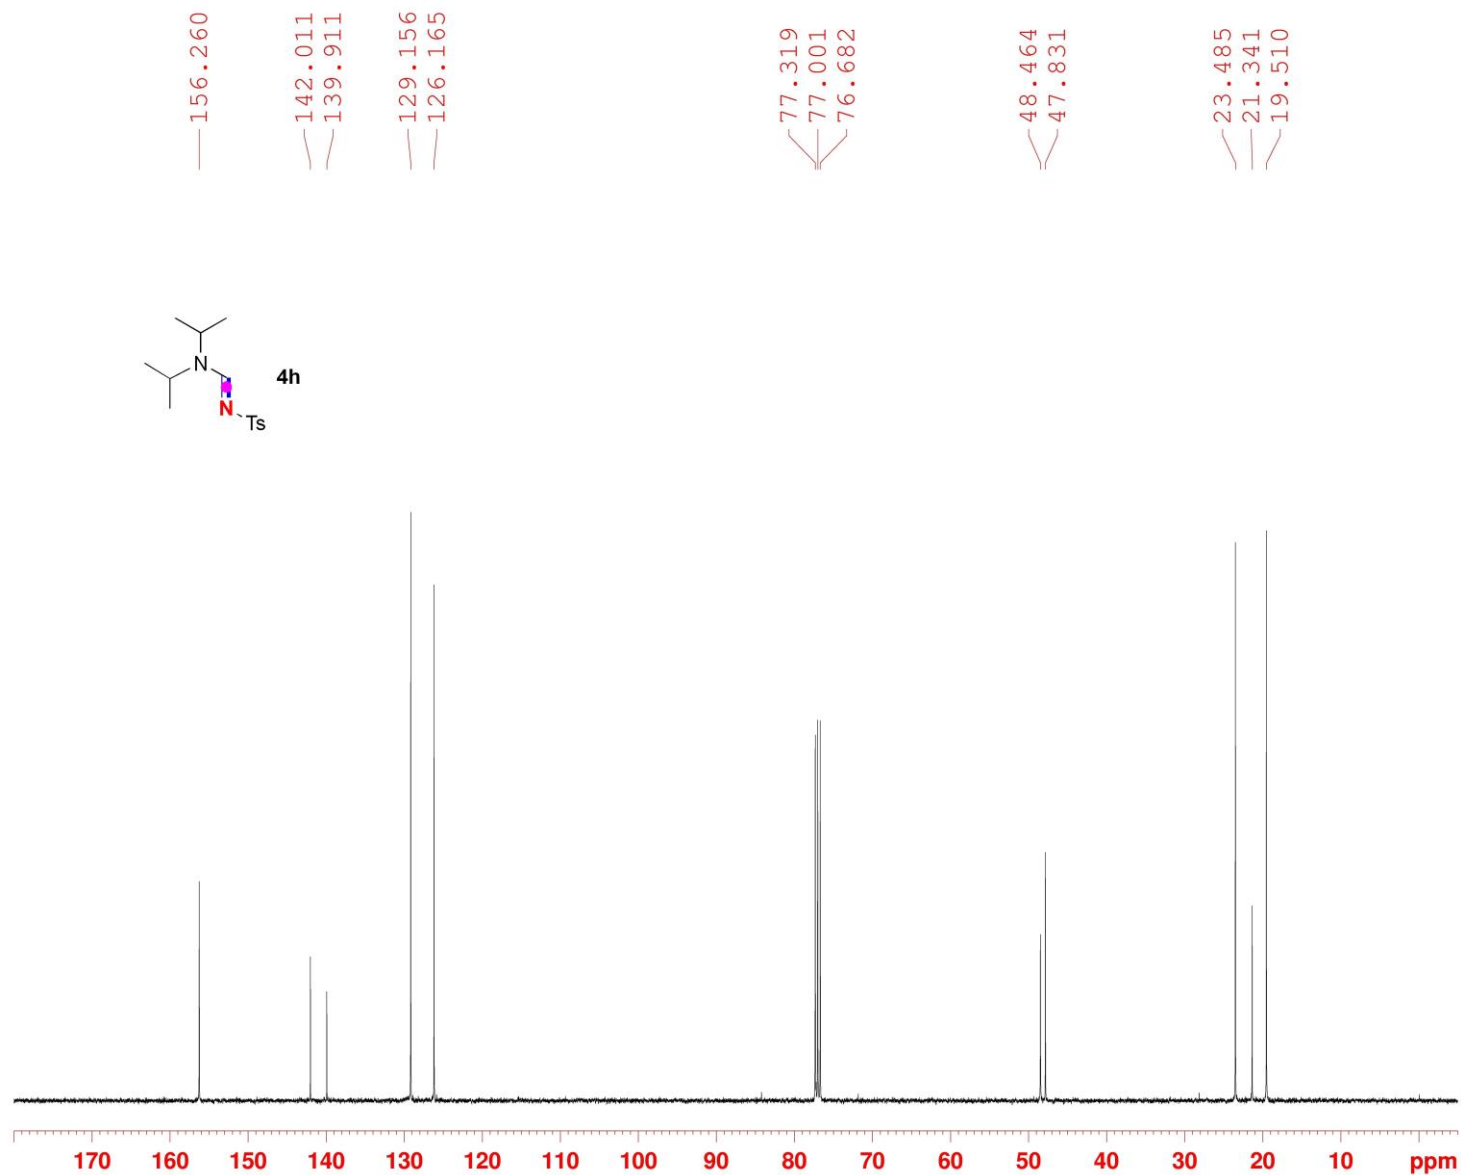

```

NAME      CLJ-WL-S368
EXPNO     2
PROCNO    1
Date_     20190109
Time      8.40
INSTRUM   spect
PROBHD    5 mm PABBO BB/
PULPROG   zgpg30
TD        65536
SOLVENT   CDCl3
NS        512
DS        0
SWH       24038.461 Hz
FIDRES    0.366798 Hz
AQ        1.3631988 sec
RG        194.26
DW        20.800 usec
DE        6.50 usec
TE        300.1 K
D1        2.00000000 sec
D11       0.03000000 sec
TD0       1
  
```

```

===== CHANNEL f1 =====
SFO1     100.6228293 MHz
NUC1     13C
P1       8.54 usec
SI       32768
SF       100.6127780 MHz
WDW      EM
SSB      0
LB       1.00 Hz
GB       0
PC       1.40
  
```

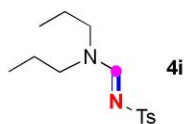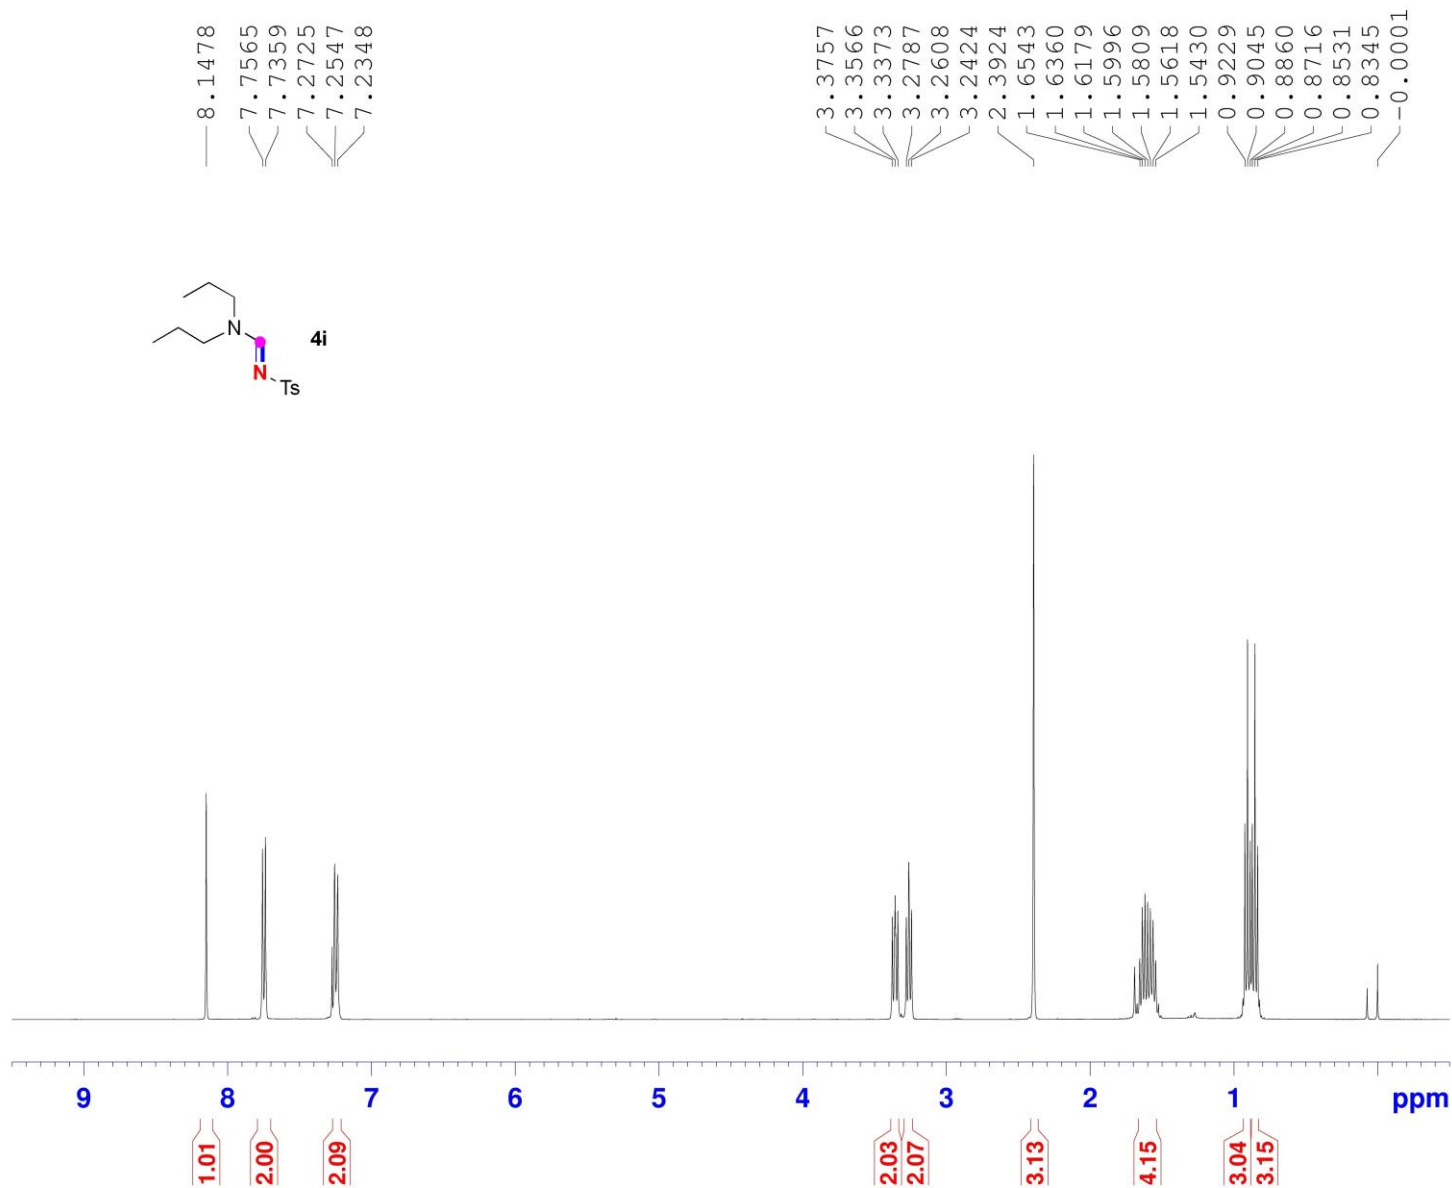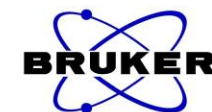

```

NAME          CLJ-WL-S353
EXPNO         1
PROCNO        1
Date_         20181225
Time_         8.54
INSTRUM       spect
PROBHD        5 mm PABBO BB/
PULPROG       zg30
TD            65536
SOLVENT       CDCl3
NS            12
DS            0
SWH           8012.820 Hz
FIDRES        0.122266 Hz
AQ            4.0894966 s
RG            47.53
DW            62.400 us
DE            6.50 us
TE            300.1 K
D1            1.00000000 s
TD0           1

===== CHANNEL f1 =====
SFO1          400.1324710 MHz
NUC1          1H
P1            8.04 us
SI            65536
SF            400.1300045 MHz
WDW           EM
SSB           0
LB            0.30 Hz
GB            0
PC            1.00
  
```

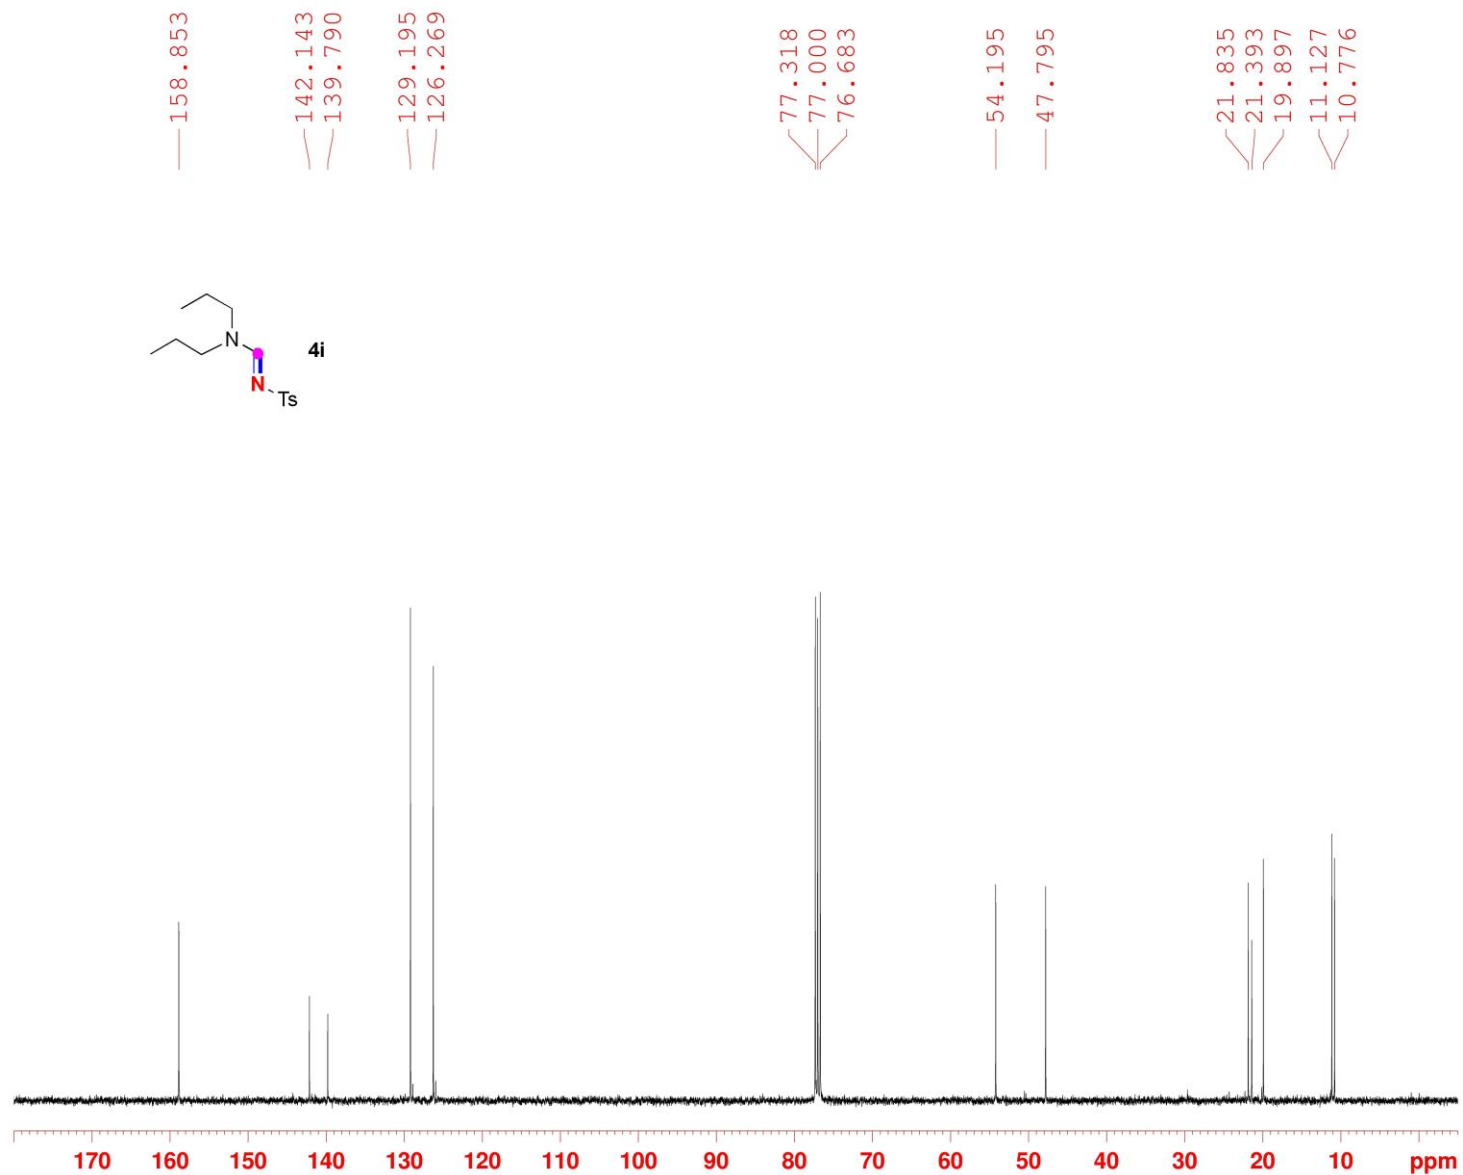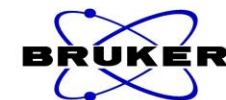

```

NAME      CLJ-WL-S353
EXPNO     2
PROCNO    1
Date_     20181225
Time      9.13
INSTRUM   spect
PROBHD    5 mm PABBO BB/
PULPROG   zgpg30
TD        65536
SOLVENT   CDCl3
NS        307
DS        0
SWH       24038.461 Hz
FIDRES    0.366798 Hz
AQ        1.3631988 sec
RG        194.26
DW        20.800 usec
DE        6.50 usec
TE        300.2 K
D1        2.00000000 sec
D11       0.03000000 sec
TD0       1
  
```

```

===== CHANNEL f1 =====
SFO1     100.6228293 MHz
NUC1     13C
P1       8.54 usec
SI       32768
SF       100.6127742 MHz
WDW      EM
SSB      0
LB       1.00 Hz
GB       0
PC       1.40
  
```

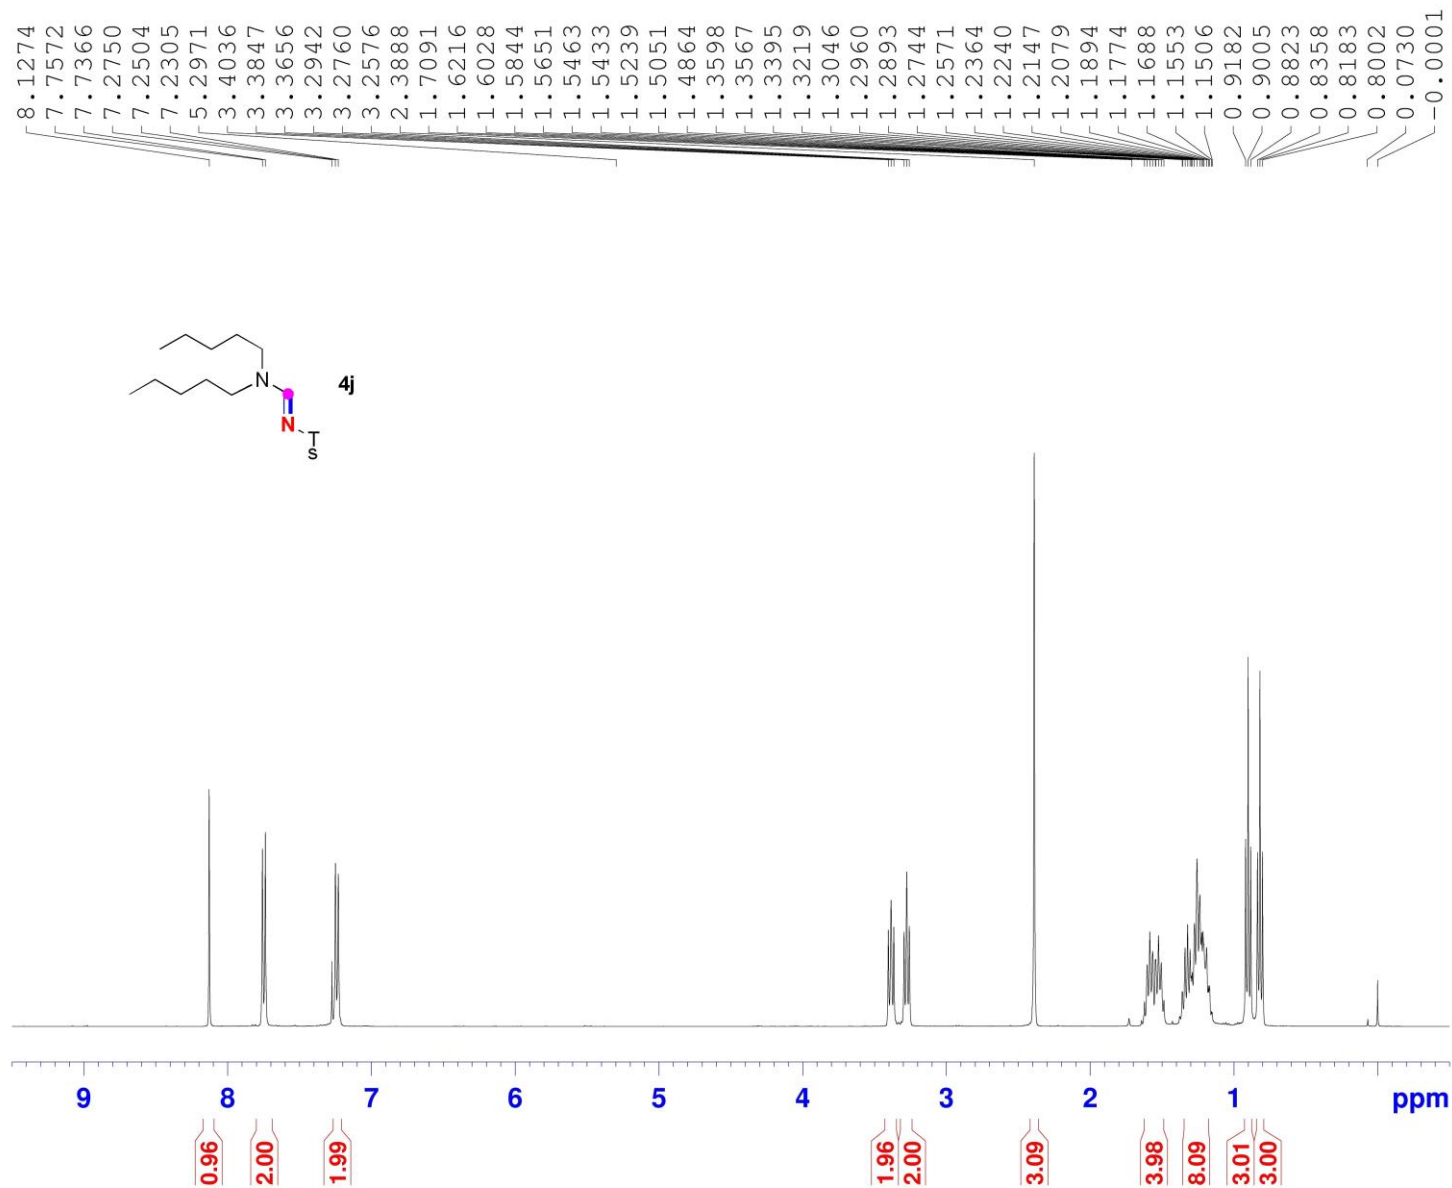

```

NAME      CLJ-WL-S367
EXPNO     1
PROCNO    1
Date_     20190109
Time      7.35
INSTRUM   spect
PROBHD    5 mm PABBO BB/
PULPROG   zg30
TD        65536
SOLVENT   CDCl3
NS        12
DS        0
SWH       8012.820 H
FIDRES    0.122266 H
AQ        4.0894966 s
RG        23.9
DW        62.400 u
DE        6.50 u
TE        300.1 K
D1        1.00000000 s
TD0       1

```

```

===== CHANNEL f1 =====
SFO1     400.1324710 M
NUC1     1H
P1       8.04 u
SI       65536
SF       400.1300036 M
WDW      EM
SSB      0
LB       0.30 H
GB       0
PC       1.00

```

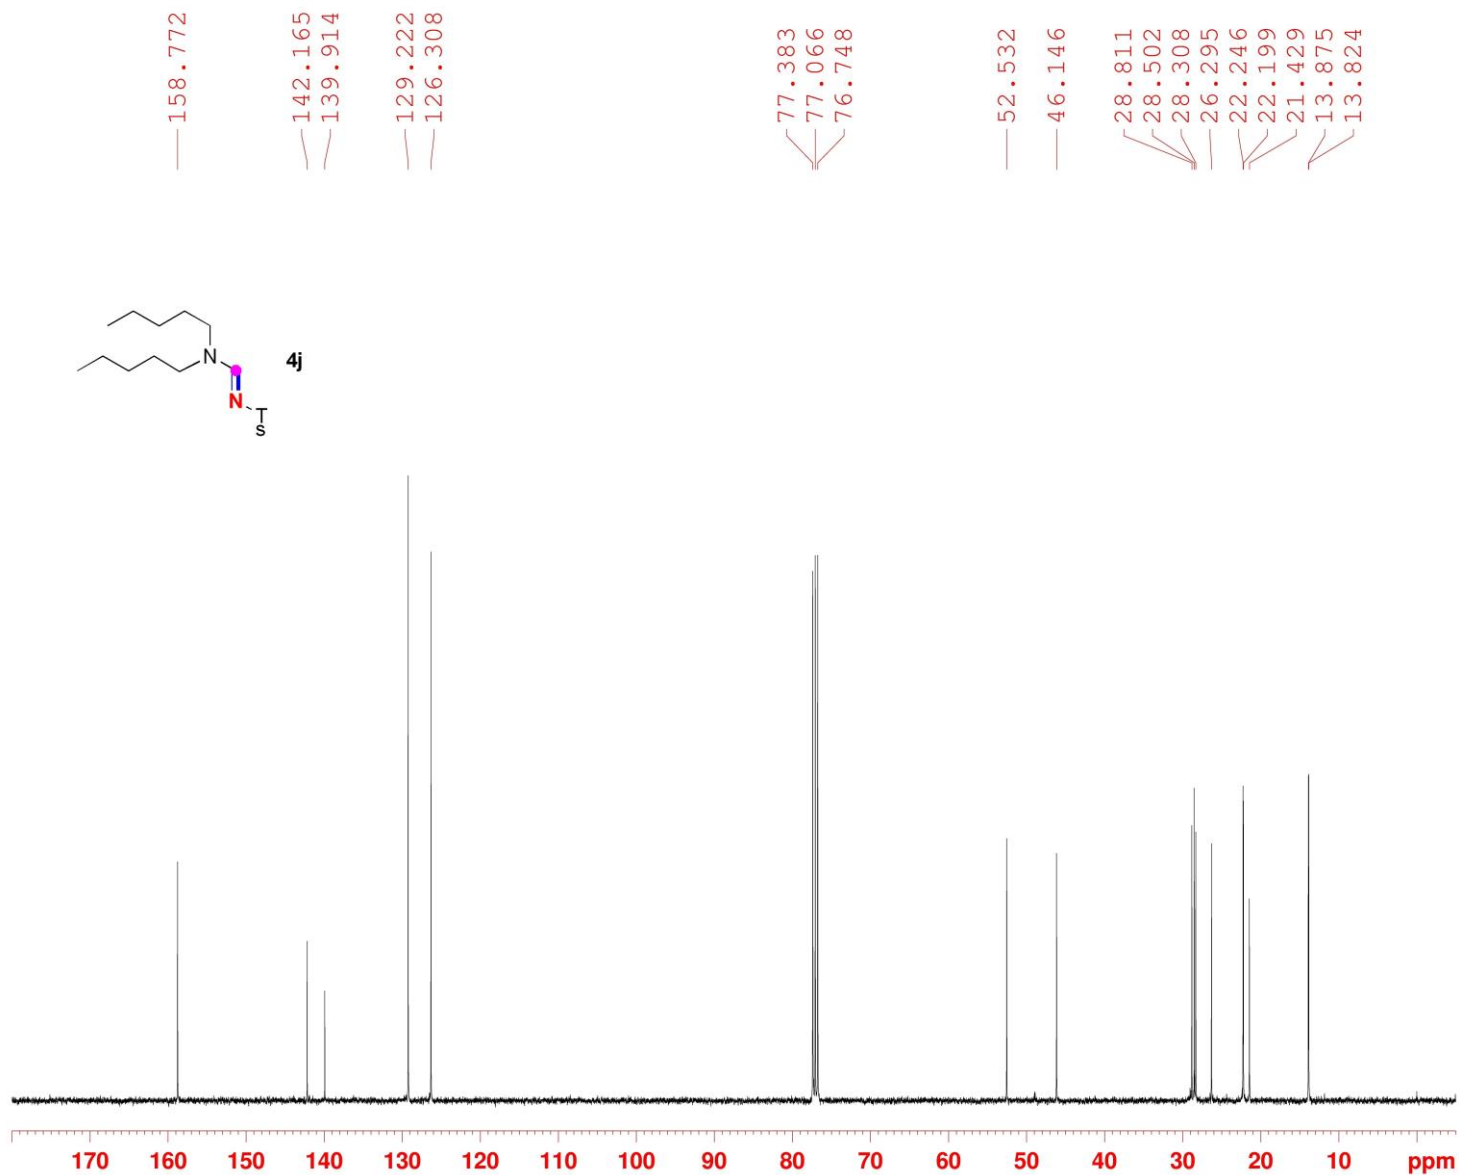

```

NAME      CLJ-WL-S367
EXPNO     2
PROCNO    1
Date_     20190109
Time      8.05
INSTRUM   spect
PROBHD    5 mm PABBO BB/
PULPROG   zgpg30
TD        65536
SOLVENT   CDCl3
NS        512
DS        0
SWH       24038.461 Hz
FIDRES    0.366798 Hz
AQ        1.3631988 sec
RG        194.26
DW        20.800 usec
DE        6.50 usec
TE        300.1 K
D1        2.00000000 sec
D11       0.03000000 sec
TD0       1

```

```

===== CHANNEL f1 =====
SFO1     100.6228293 MHz
NUC1     13C
P1       8.54 usec
SI       32768
SF       100.6127685 MHz
WDW      EM
SSB      0
LB       1.00 Hz
GB       0
PC       1.40

```

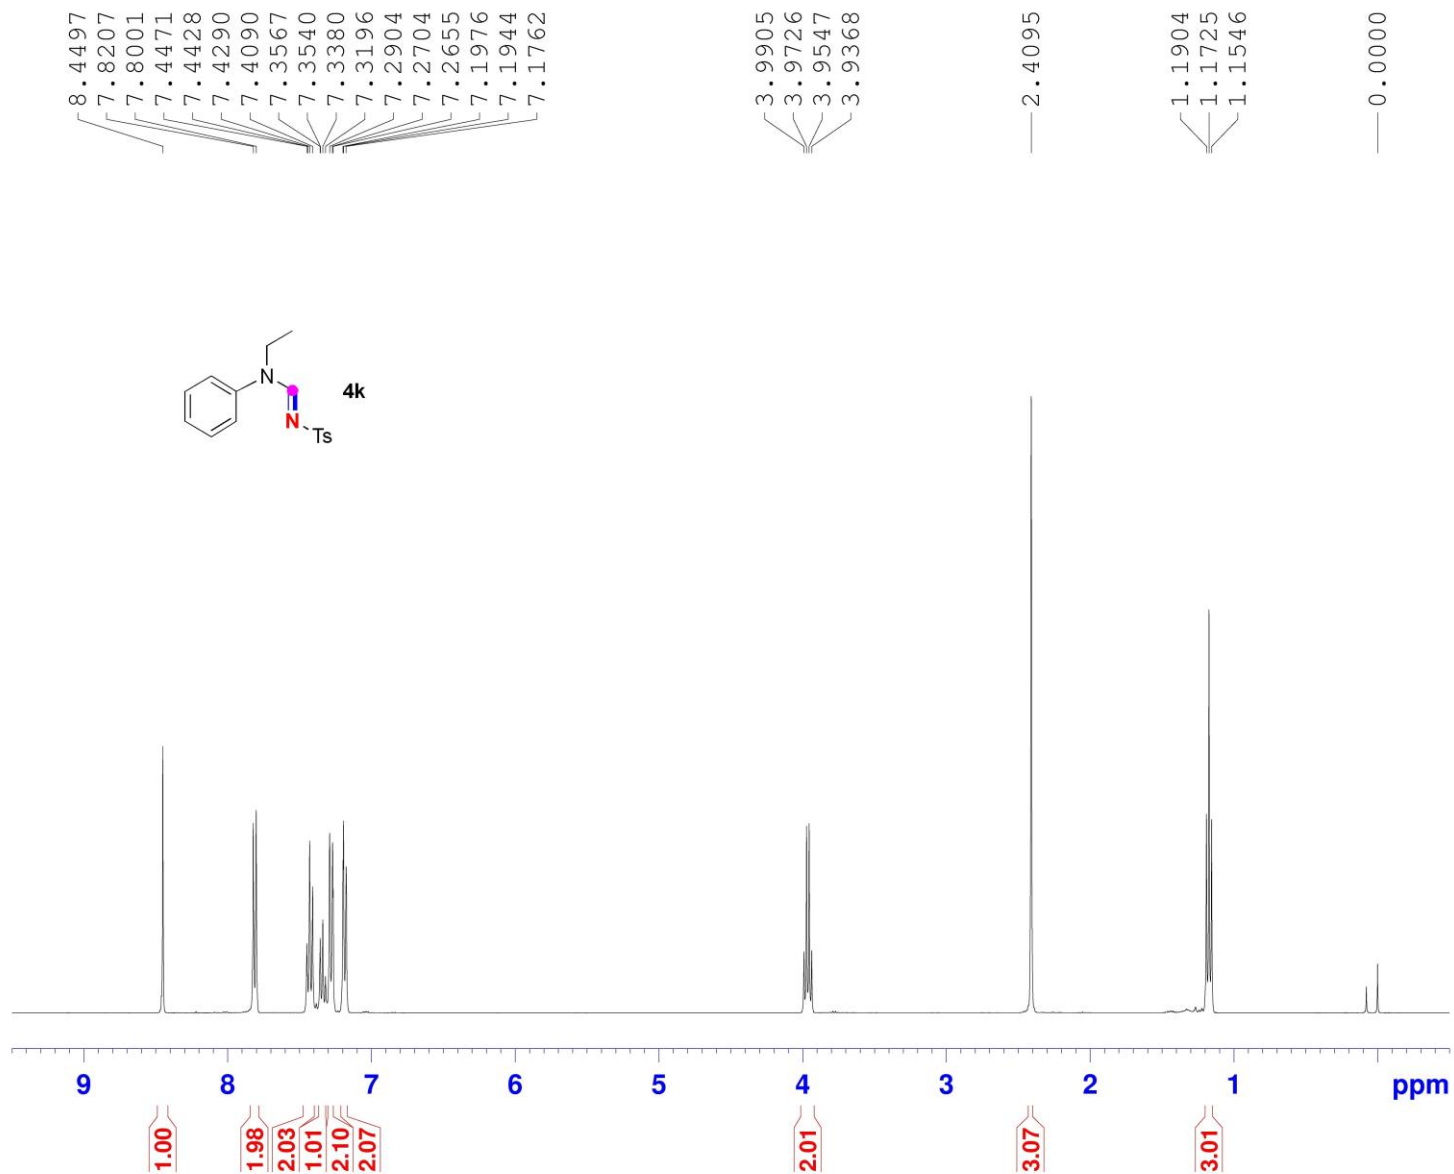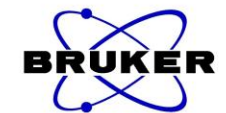

```

NAME      CLJ-WL-S384
EXPNO     1
PROCNO    1
Date_     20190118
Time      7.30
INSTRUM   spect
PROBHD    5 mm PABBO BB/
PULPROG   zg30
TD         65536
SOLVENT   CDCl3
NS         12
DS         0
SWH        8012.820 Hz
FIDRES     0.122266 Hz
AQ         4.0894966 s
RG         47.53
DW         62.400 ns
DE         6.50 ns
TE         300.2 K
D1         1.00000000 s
TD0        1

===== CHANNEL f1 =====
SFO1      400.1324710 MHz
NUC1       1H
P1         8.04 ns
SI         65536
SF         400.1300073 MHz
WDW        EM
SSB        0
LB         0.30 Hz
GB         0
PC         1.00

```

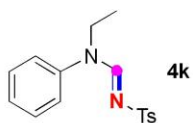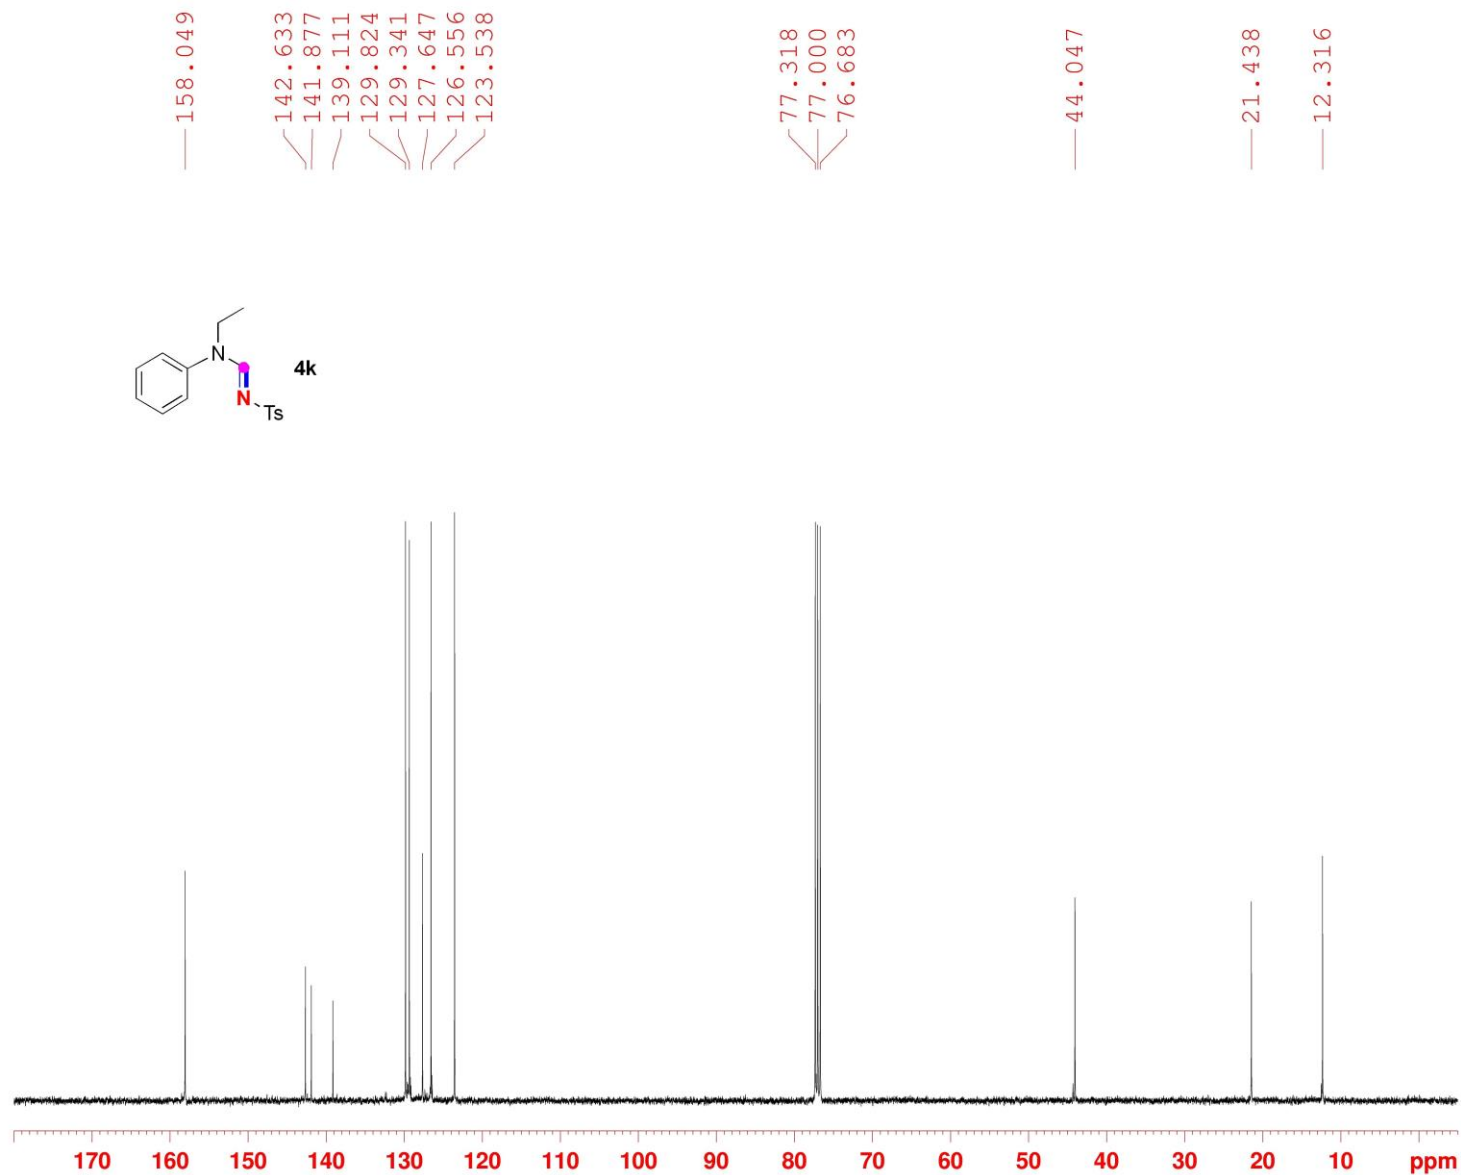

NAME CLJ-WL-S384  
EXPNO 2  
PROCNO 1  
Date\_ 20190118  
Time 8.01  
INSTRUM spect  
PROBHD 5 mm PABBO BB/  
PULPROG zgpg30  
TD 65536  
SOLVENT CDCl<sub>3</sub>  
NS 512  
DS 0  
SWH 24038.461 Hz  
FIDRES 0.366798 Hz  
AQ 1.3631988 sec  
RG 194.26  
DW 20.800 usec  
DE 6.50 usec  
TE 300.2 K  
D1 2.00000000 sec  
D11 0.03000000 sec  
TD0 1

===== CHANNEL f1 =====  
SFO1 100.6228293 MHz  
NUC1 13C  
P1 8.54 usec  
SI 32768  
SF 100.6127756 MHz  
WDW EM  
SSB 0  
LB 1.00 Hz  
GB 0  
PC 1.40

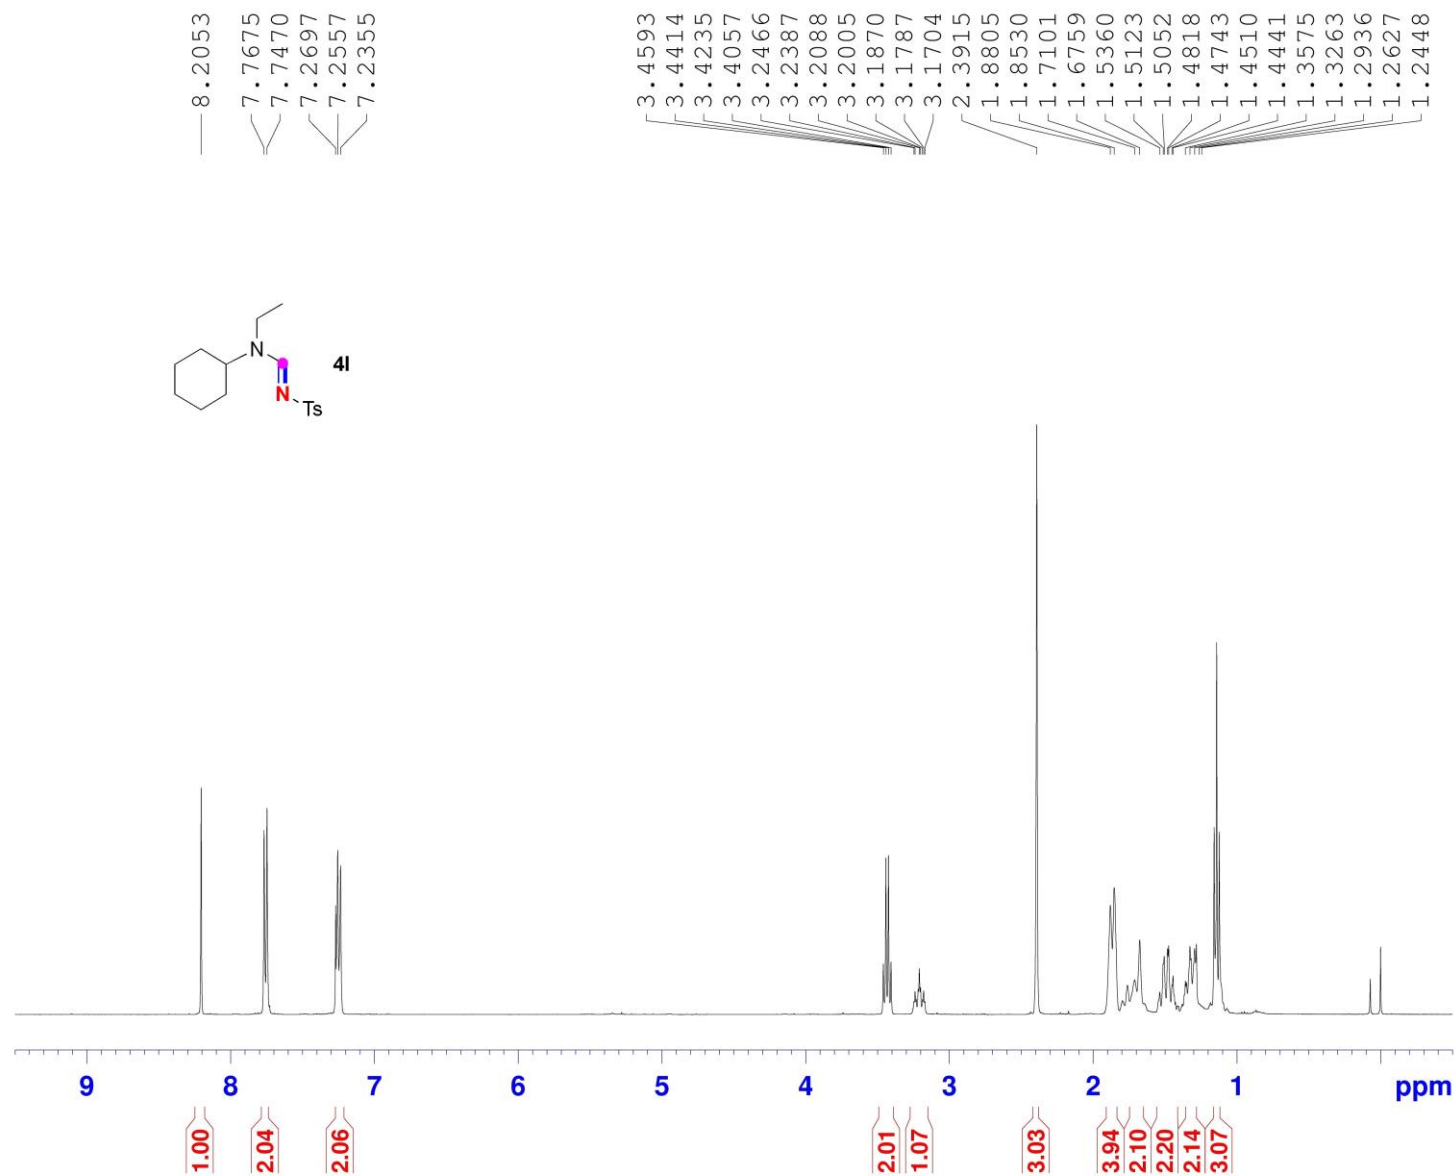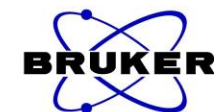

```

NAME      CLJ-WL-S392
EXPNO     1
PROCNO    1
Date_     20190226
Time      7.34
INSTRUM   spect
PROBHD    5 mm PABBO BB/
PULPROG   zg30
TD         65536
SOLVENT   CDCl3
NS         8
DS         0
SWH        8012.820 H
FIDRES     0.122266 H
AQ         4.0894966 s
RG         51.19
DW         62.400 u
DE         6.50 u
TE         300.7 K
D1         1.00000000 s
TD0        1

```

```

===== CHANNEL f1 =====
SFO1      400.1324710 M
NUC1      1H
P1         8.04 u
SI        65536
SF         400.1300056 M
WDW        EM
SSB        0
LB         0.30 H
GB         0
PC         1.00

```

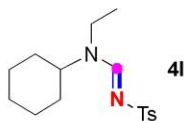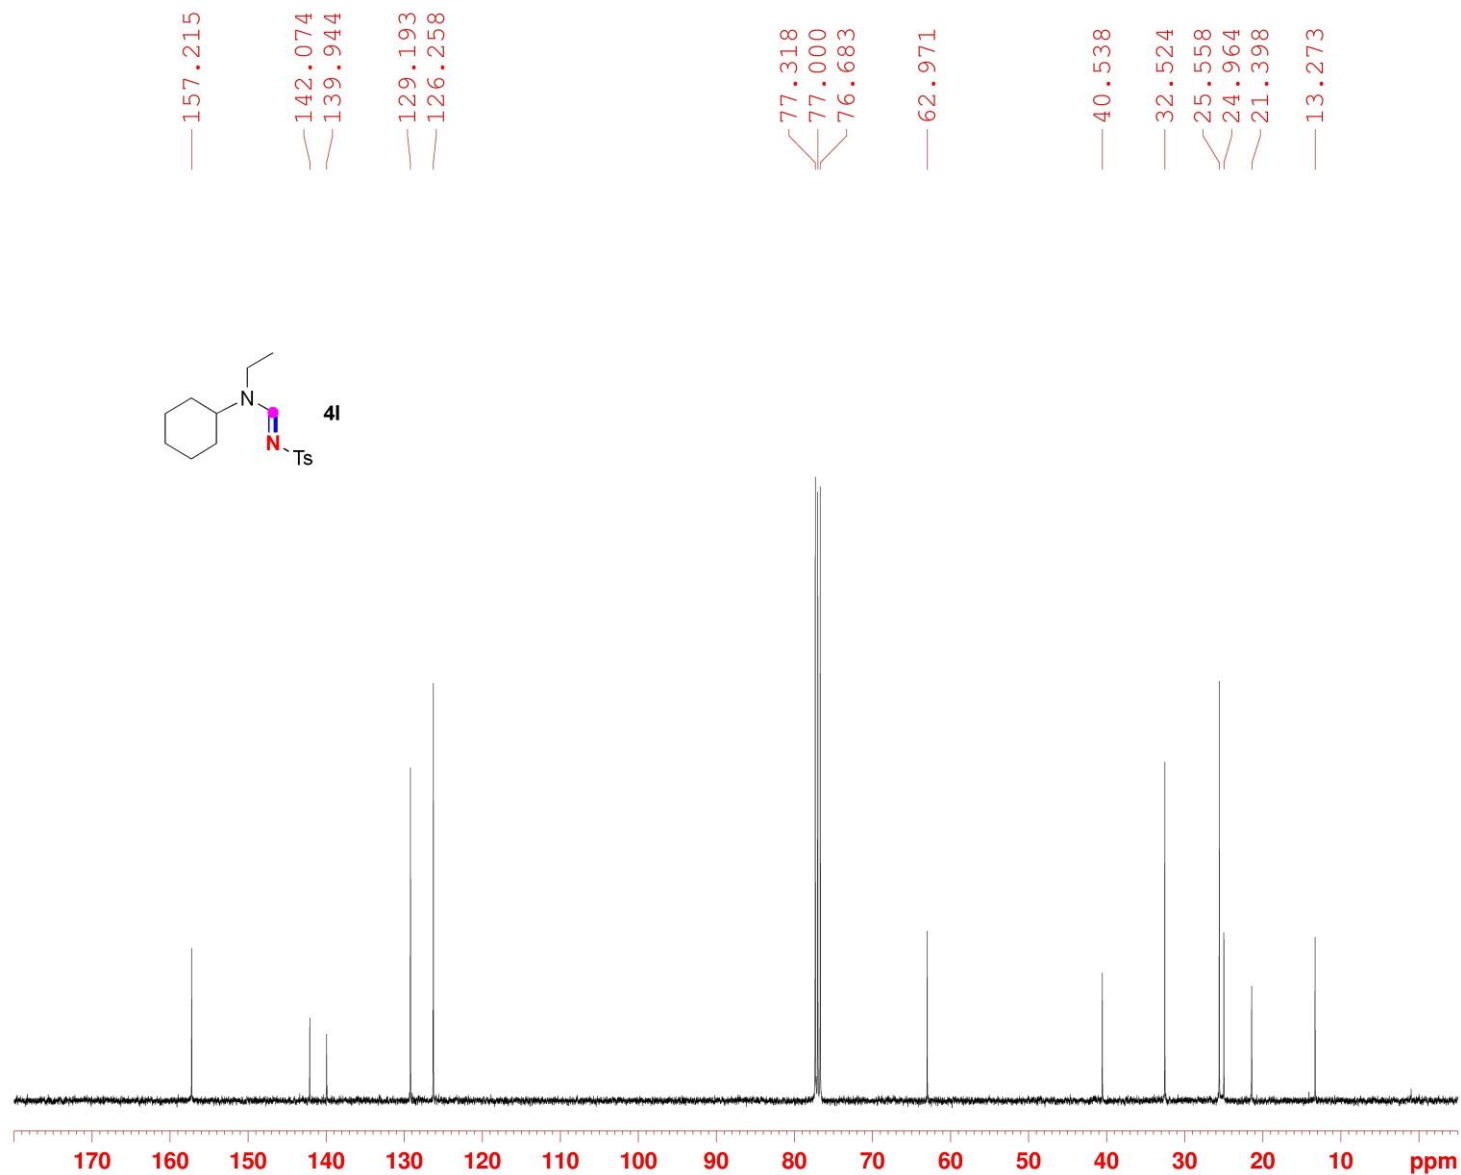

```

NAME          CLJ-WL-S392
EXPNO          2
PROCNO         1
Date_          20190226
Time           8.05
INSTRUM        spect
PROBHD         5 mm PABBO BB/
PULPROG        zgpg30
TD             65536
SOLVENT        CDCl3
NS             512
DS             0
SWH            24038.461 Hz
FIDRES         0.366798 Hz
AQ            1.3631988 sec
RG            194.26
DW            20.800 usec
DE             6.50 usec
TE             300.6 K
D1            2.00000000 sec
D11           0.03000000 sec
TD0            1
  
```

```

===== CHANNEL f1 =====
SFO1          100.6228293 MHz
NUC1           13C
P1             8.54 usec
SI            32768
SF            100.6127734 MHz
WDW            EM
SSB            0
LB             1.00 Hz
GB             0
PC             1.40
  
```

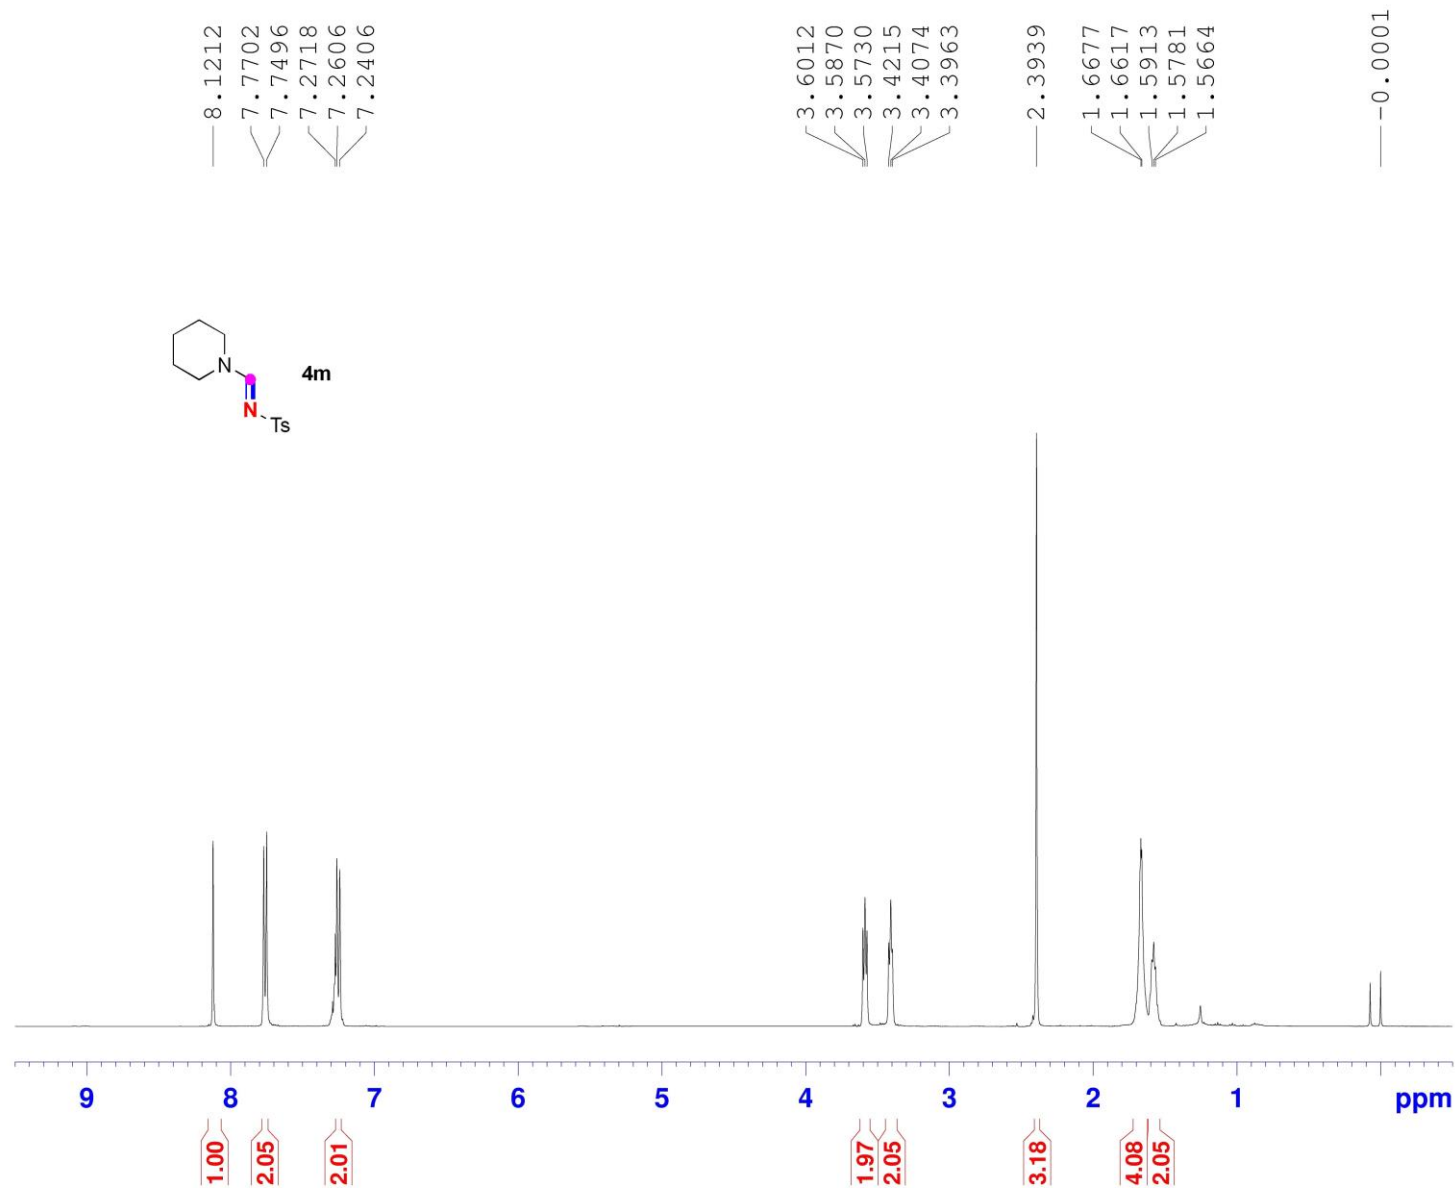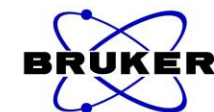

```

NAME          CLJ-WL-S383
EXPNO         1
PROCNO        1
Date_         20190115
Time_         0.52
INSTRUM       spect
PROBHD        5 mm PABBO BB/
PULPROG       zg30
TD            65536
SOLVENT       CDC13
NS            12
DS            0
SWH           8012.820 Hz
FIDRES        0.122266 Hz
AQ            4.0894966 s
RG            47.53
DW            62.400 ns
DE            6.50 ns
TE            300.1 K
D1            1.00000000 s
TD0           1
  
```

```

===== CHANNEL f1 =====
SFO1          400.1324710 MHz
NUC1          1H
P1            8.04 ns
SI            65536
SF            400.1300047 MHz
WDW           EM
SSB           0
LB            0.30 Hz
GB            0
PC            1.00
  
```

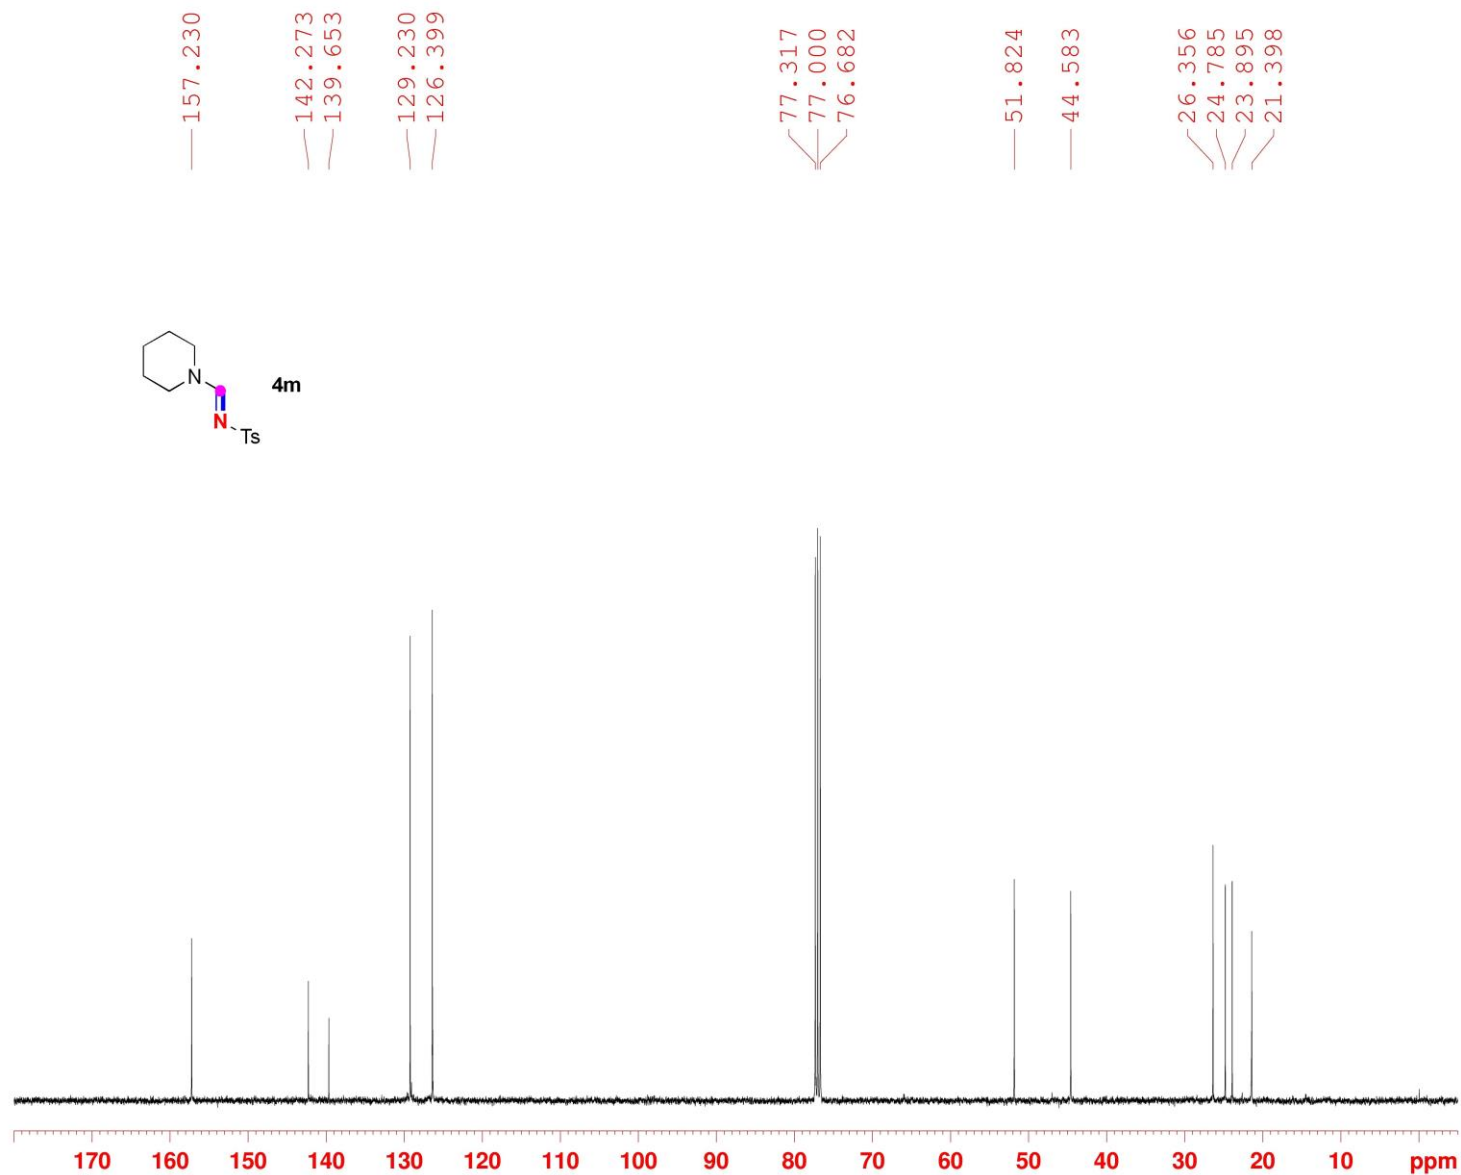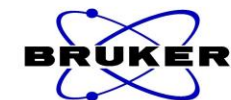

```

NAME      CLJ-WL-S383
EXPNO     2
PROCNO    1
Date_     20190115
Time      1.22
INSTRUM   spect
PROBHD    5 mm PABBO BB/
PULPROG   zgpg30
TD        65536
SOLVENT   CDCl3
NS        512
DS        0
SWH       24038.461 Hz
FIDRES    0.366798 Hz
AQ        1.3631988 sec
RG        194.26
DW        20.800 usec
DE        6.50 usec
TE        300.1 K
D1        2.00000000 sec
D11       0.03000000 sec
TD0       1
  
```

```

===== CHANNEL f1 =====
SFO1     100.6228293 MHz
NUC1      13C
P1       8.54 usec
SI       32768
SF       100.6127752 MHz
WDW      EM
SSB      0
LB       1.00 Hz
GB       0
PC       1.40
  
```

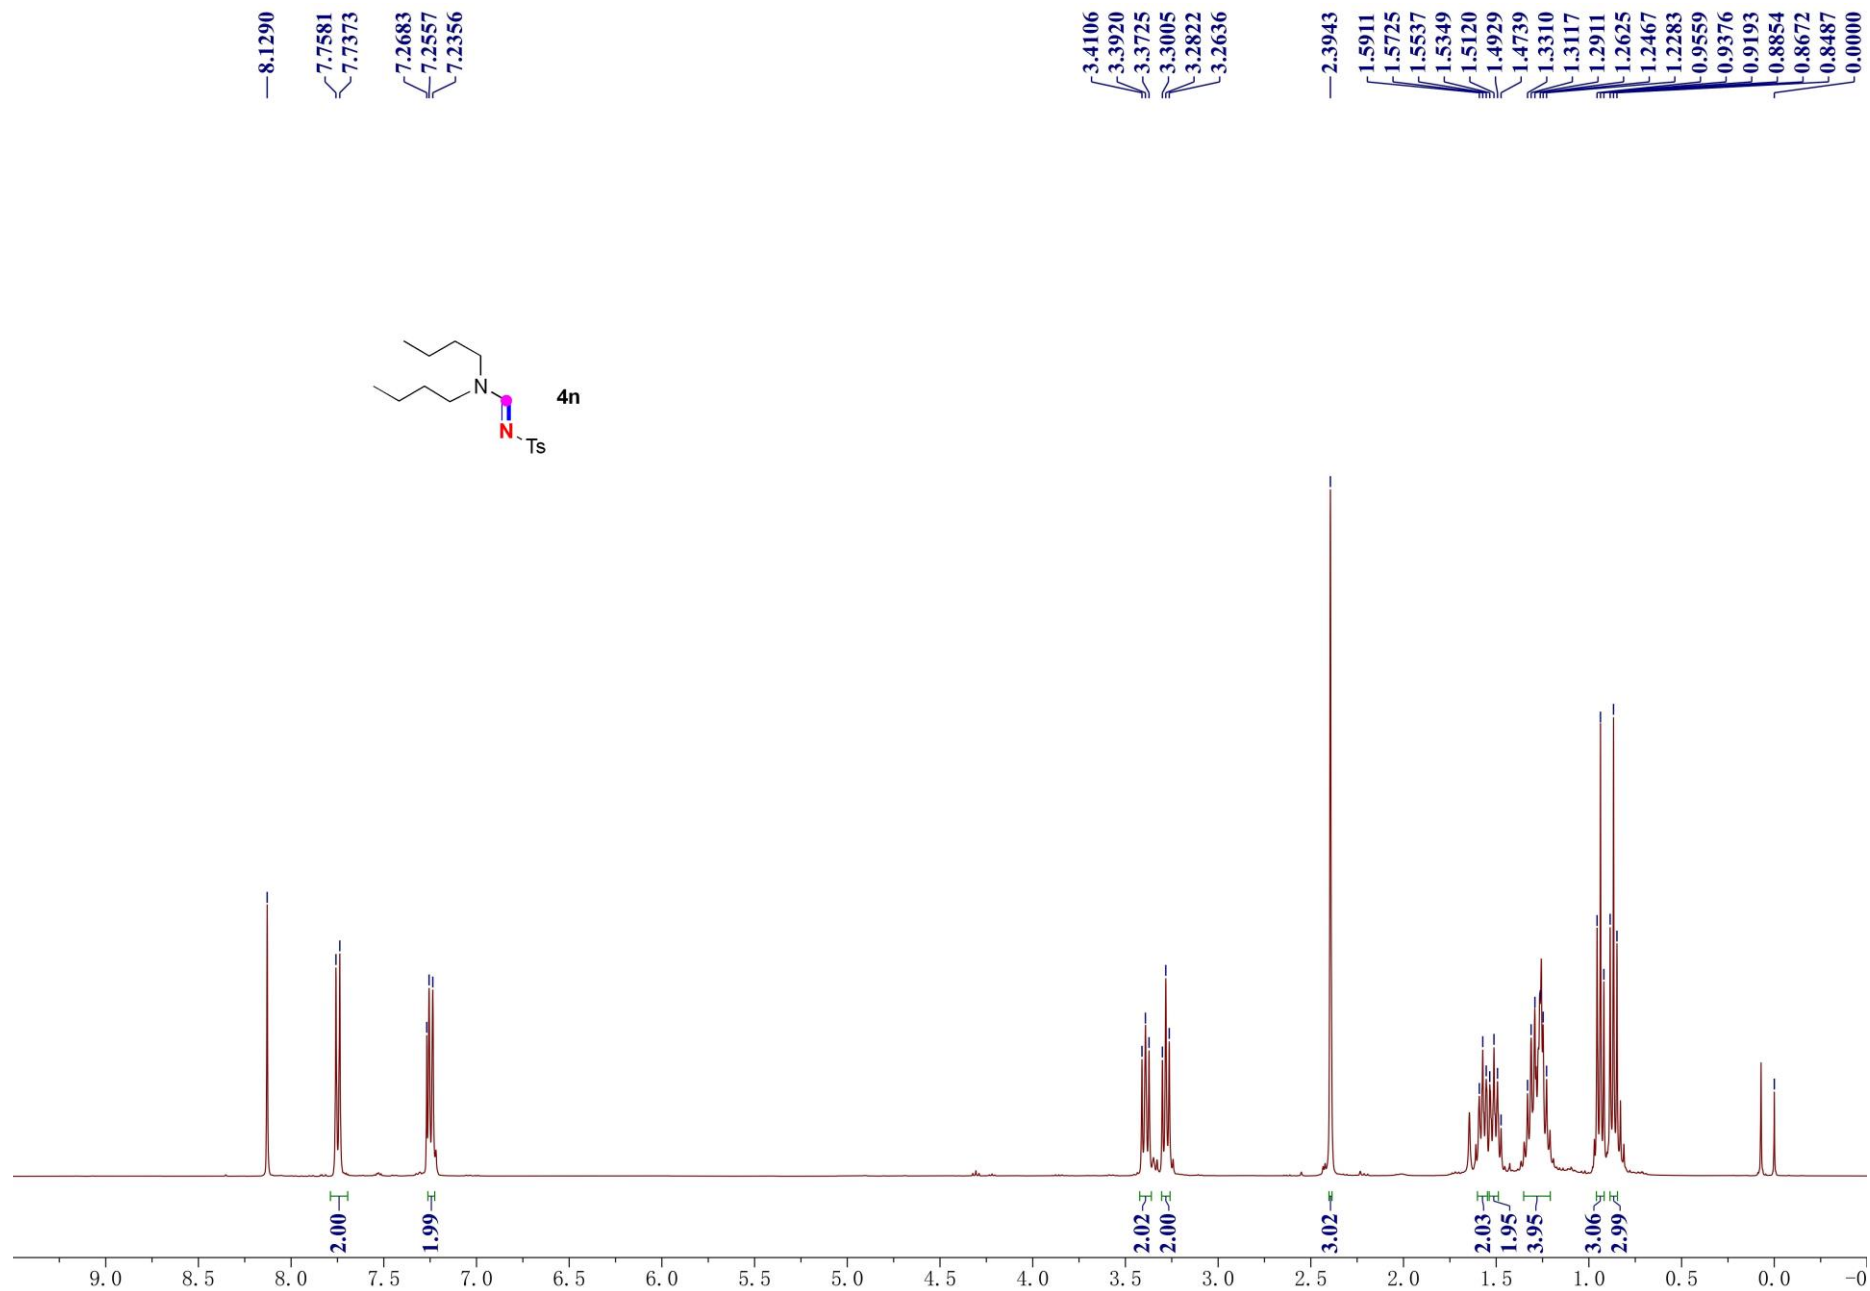

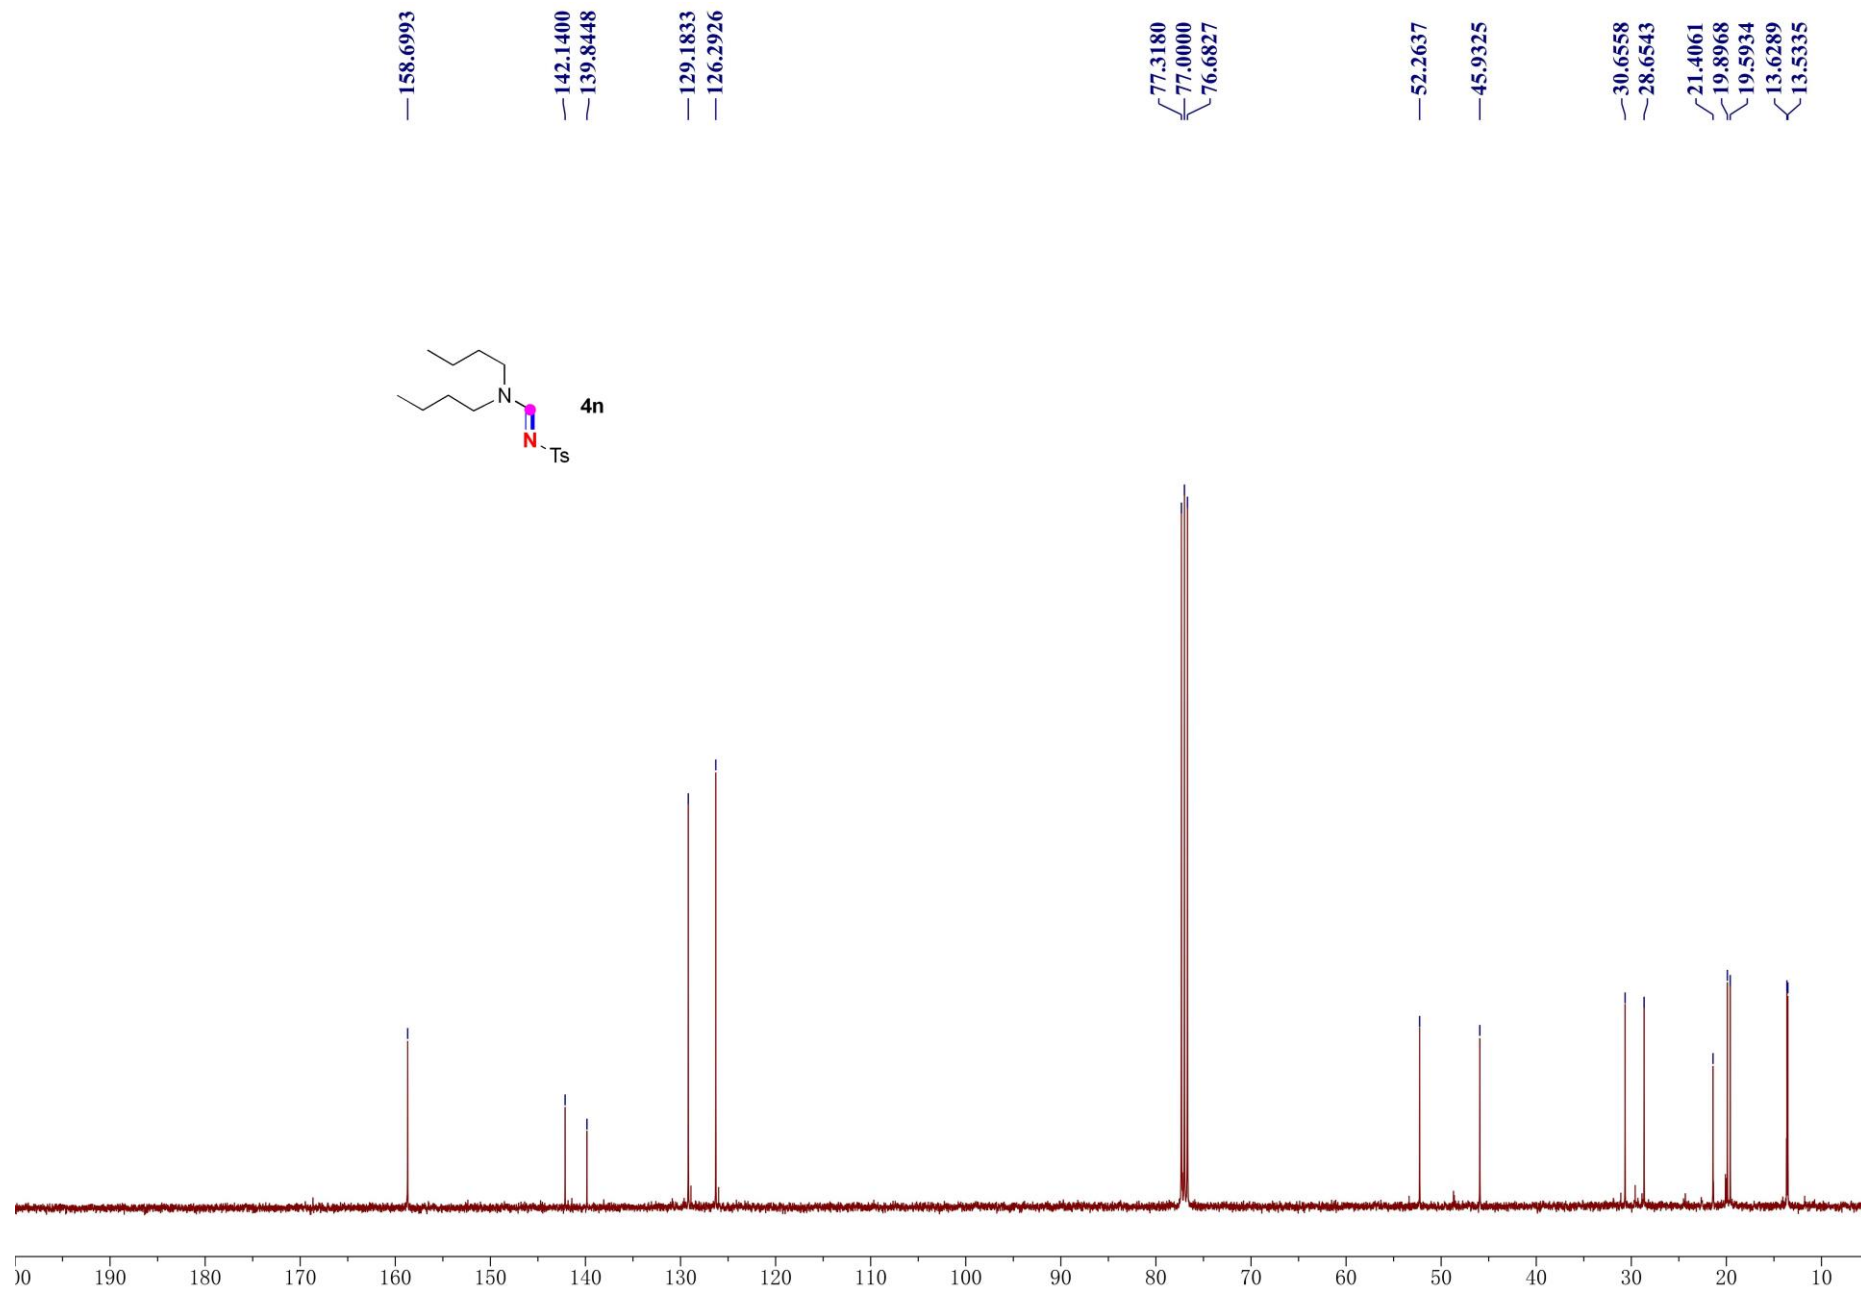

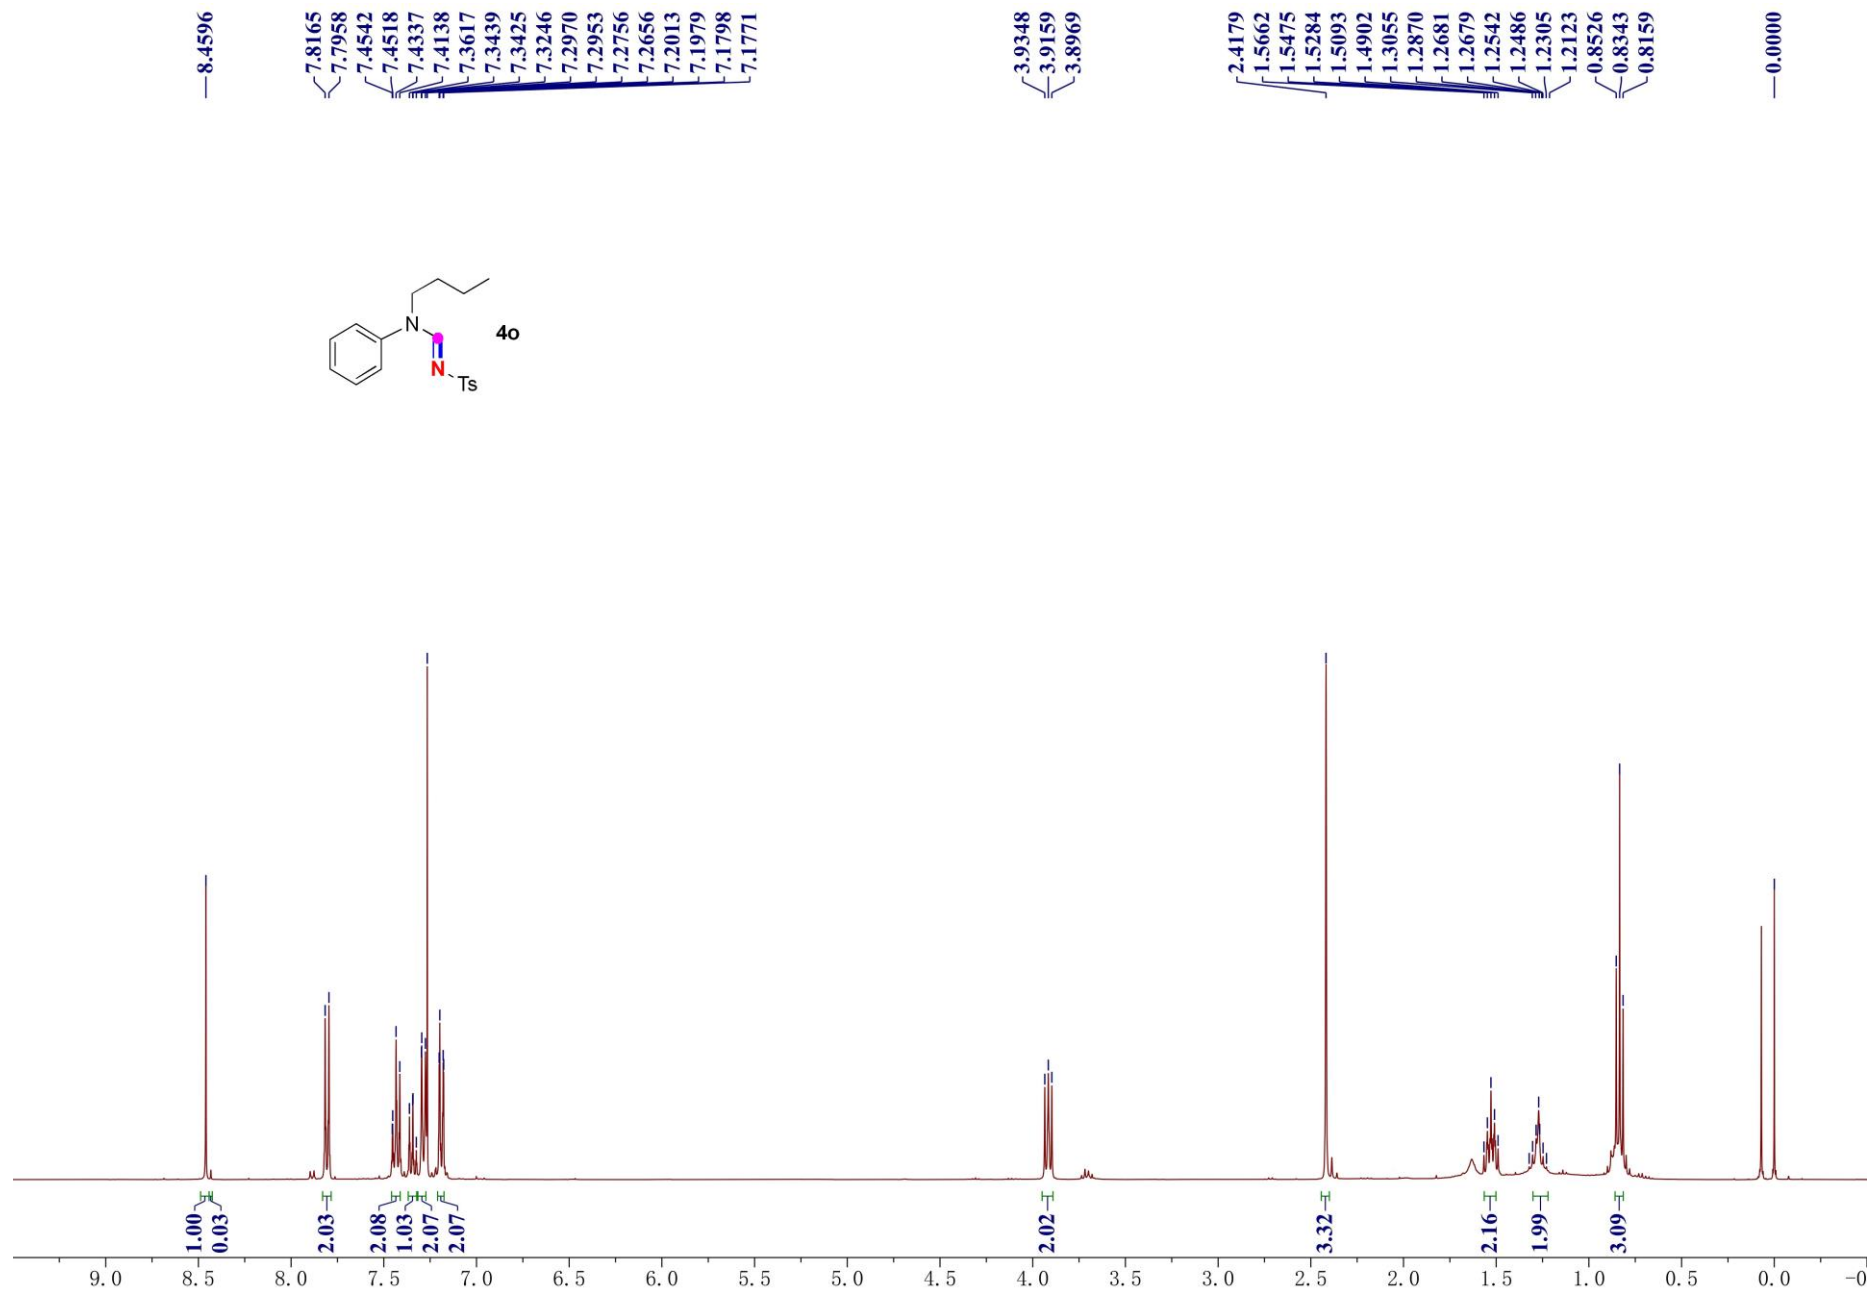

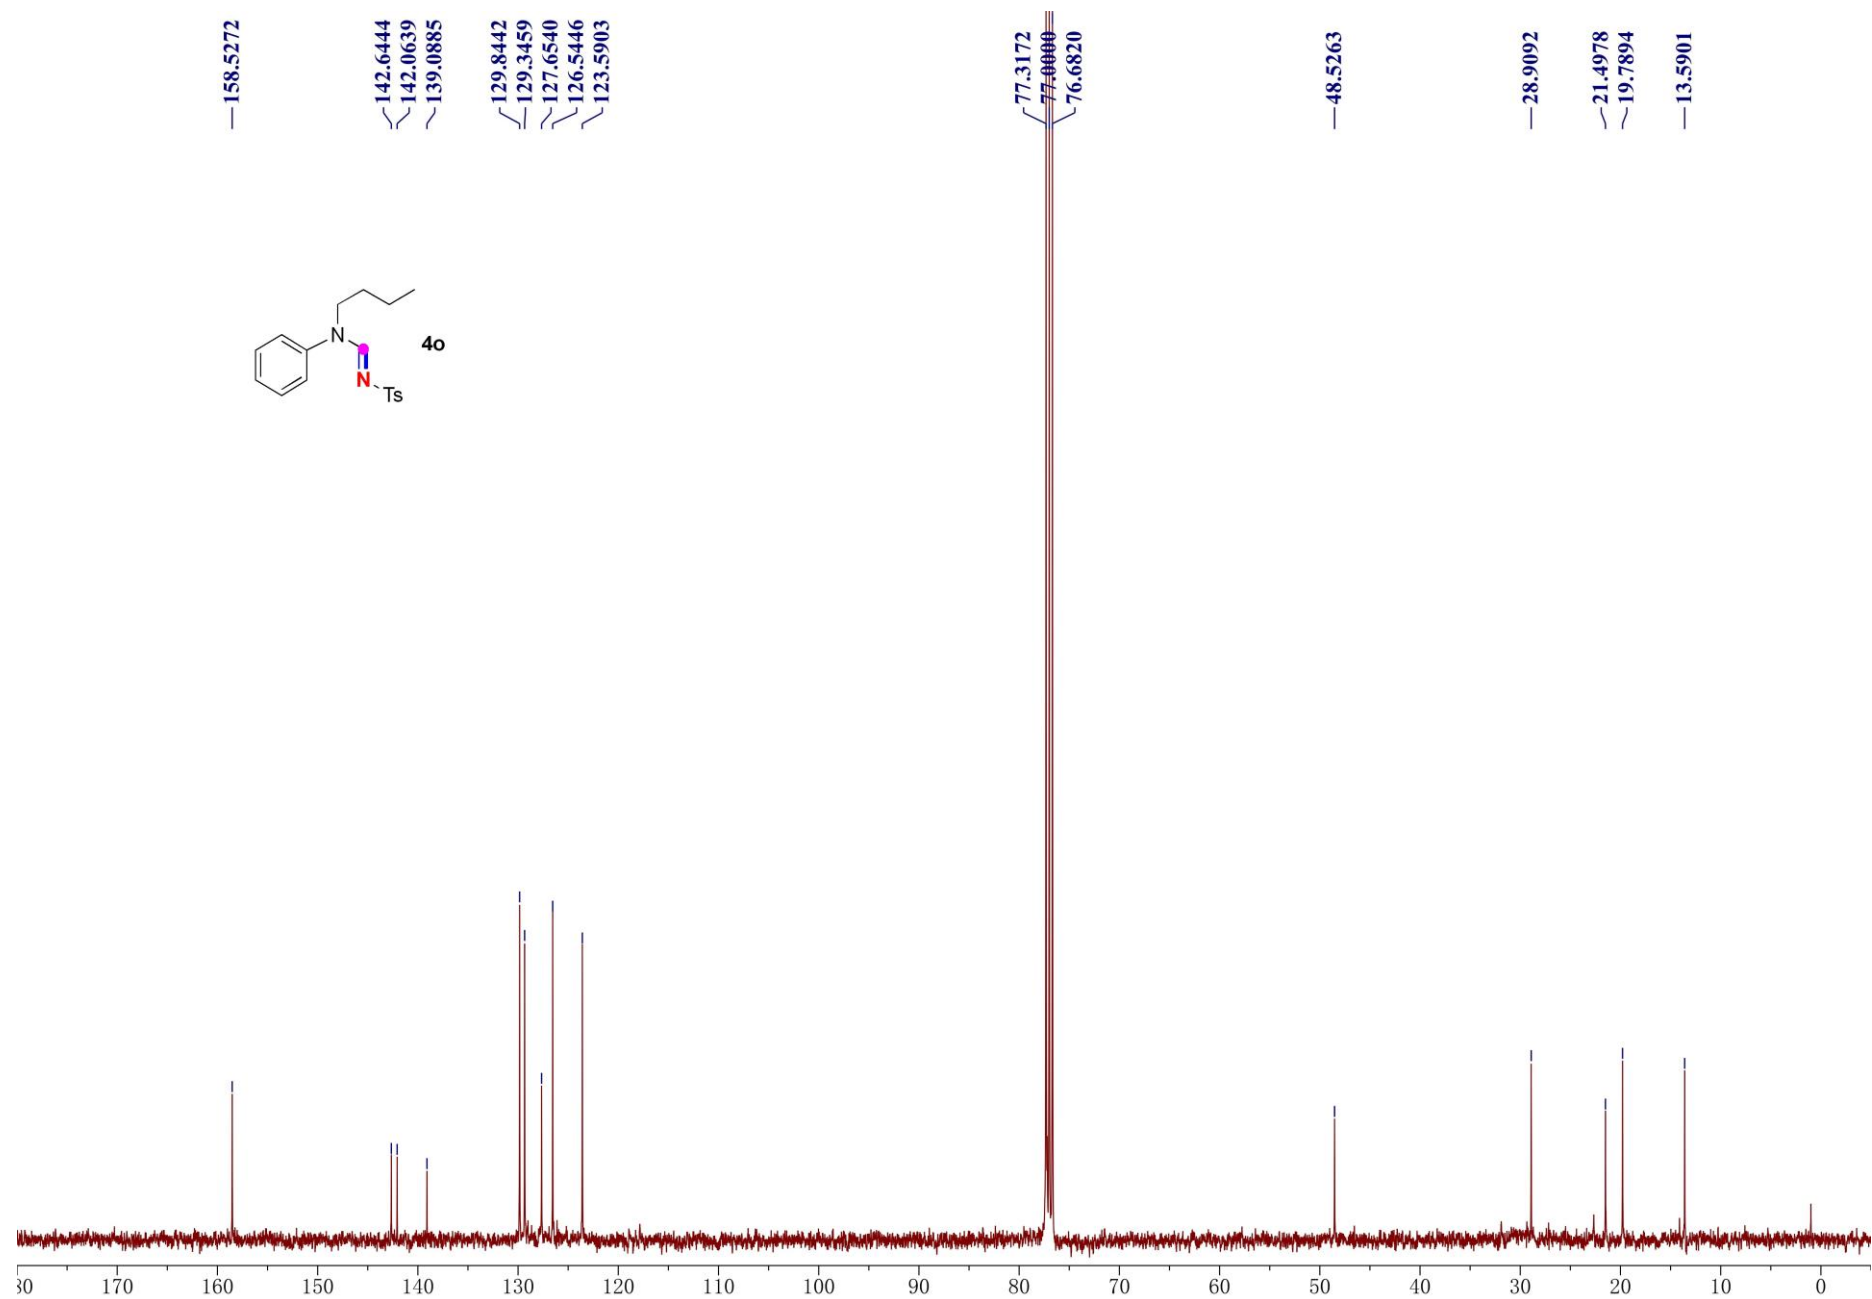

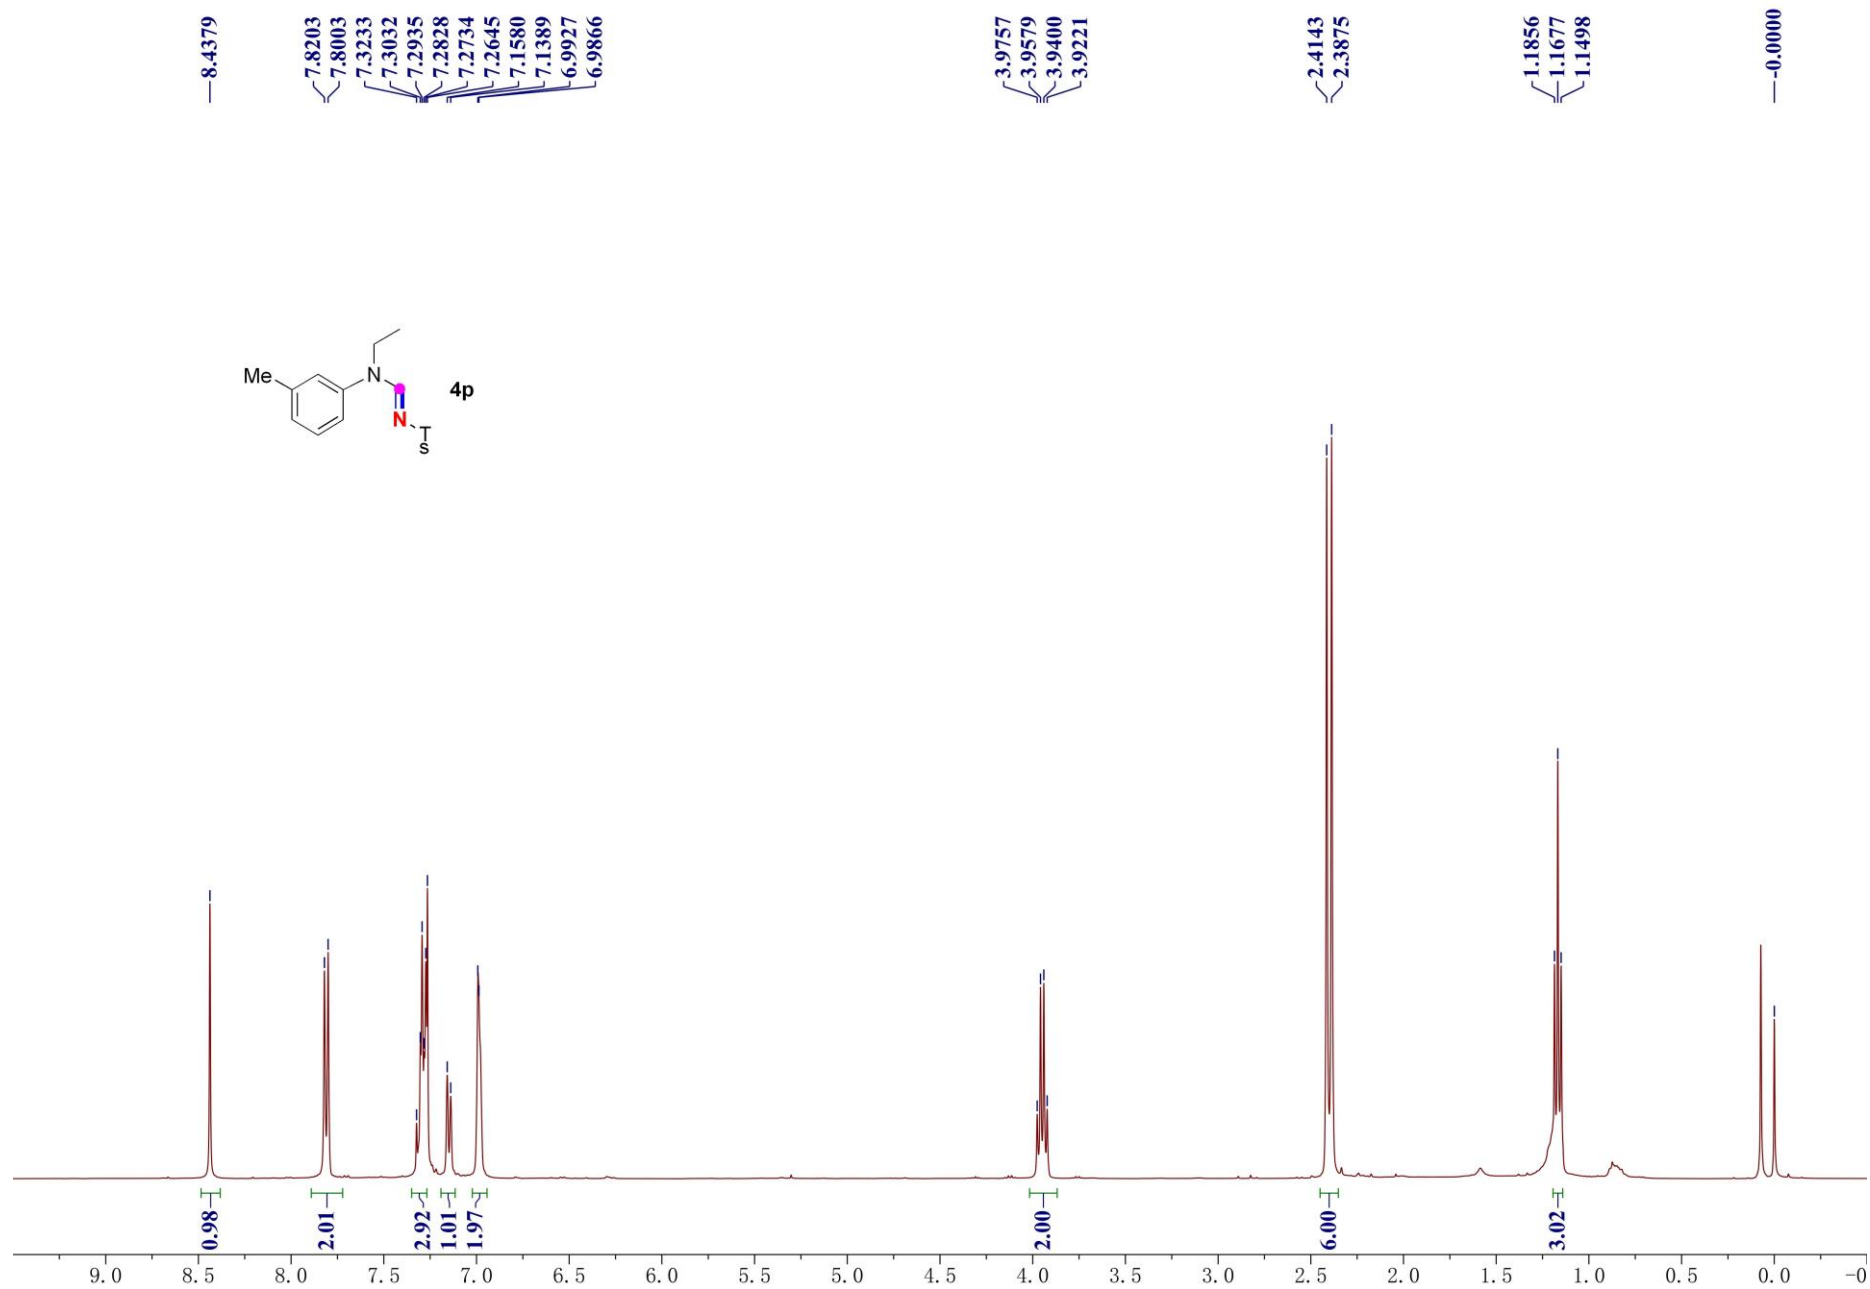

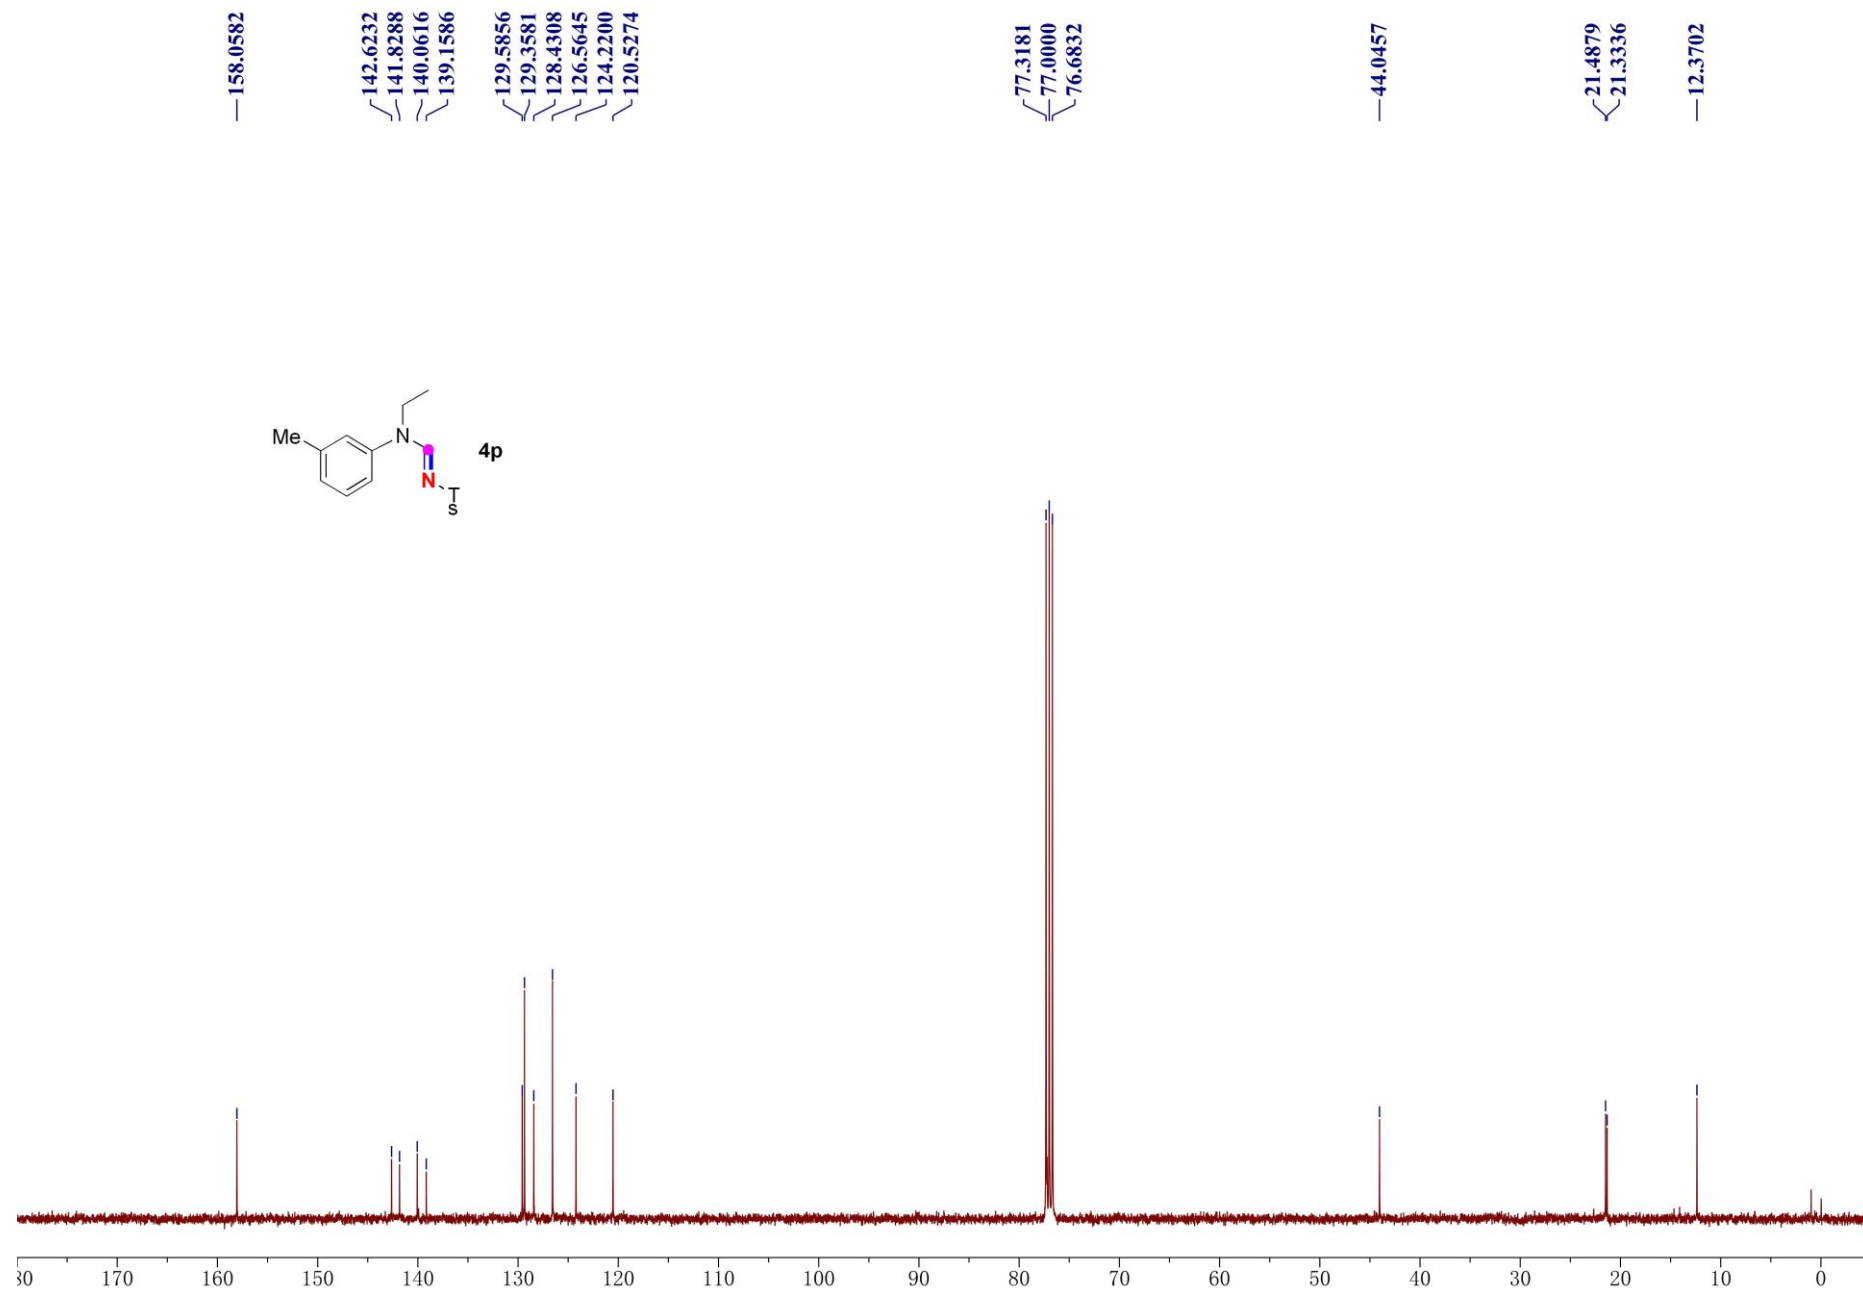

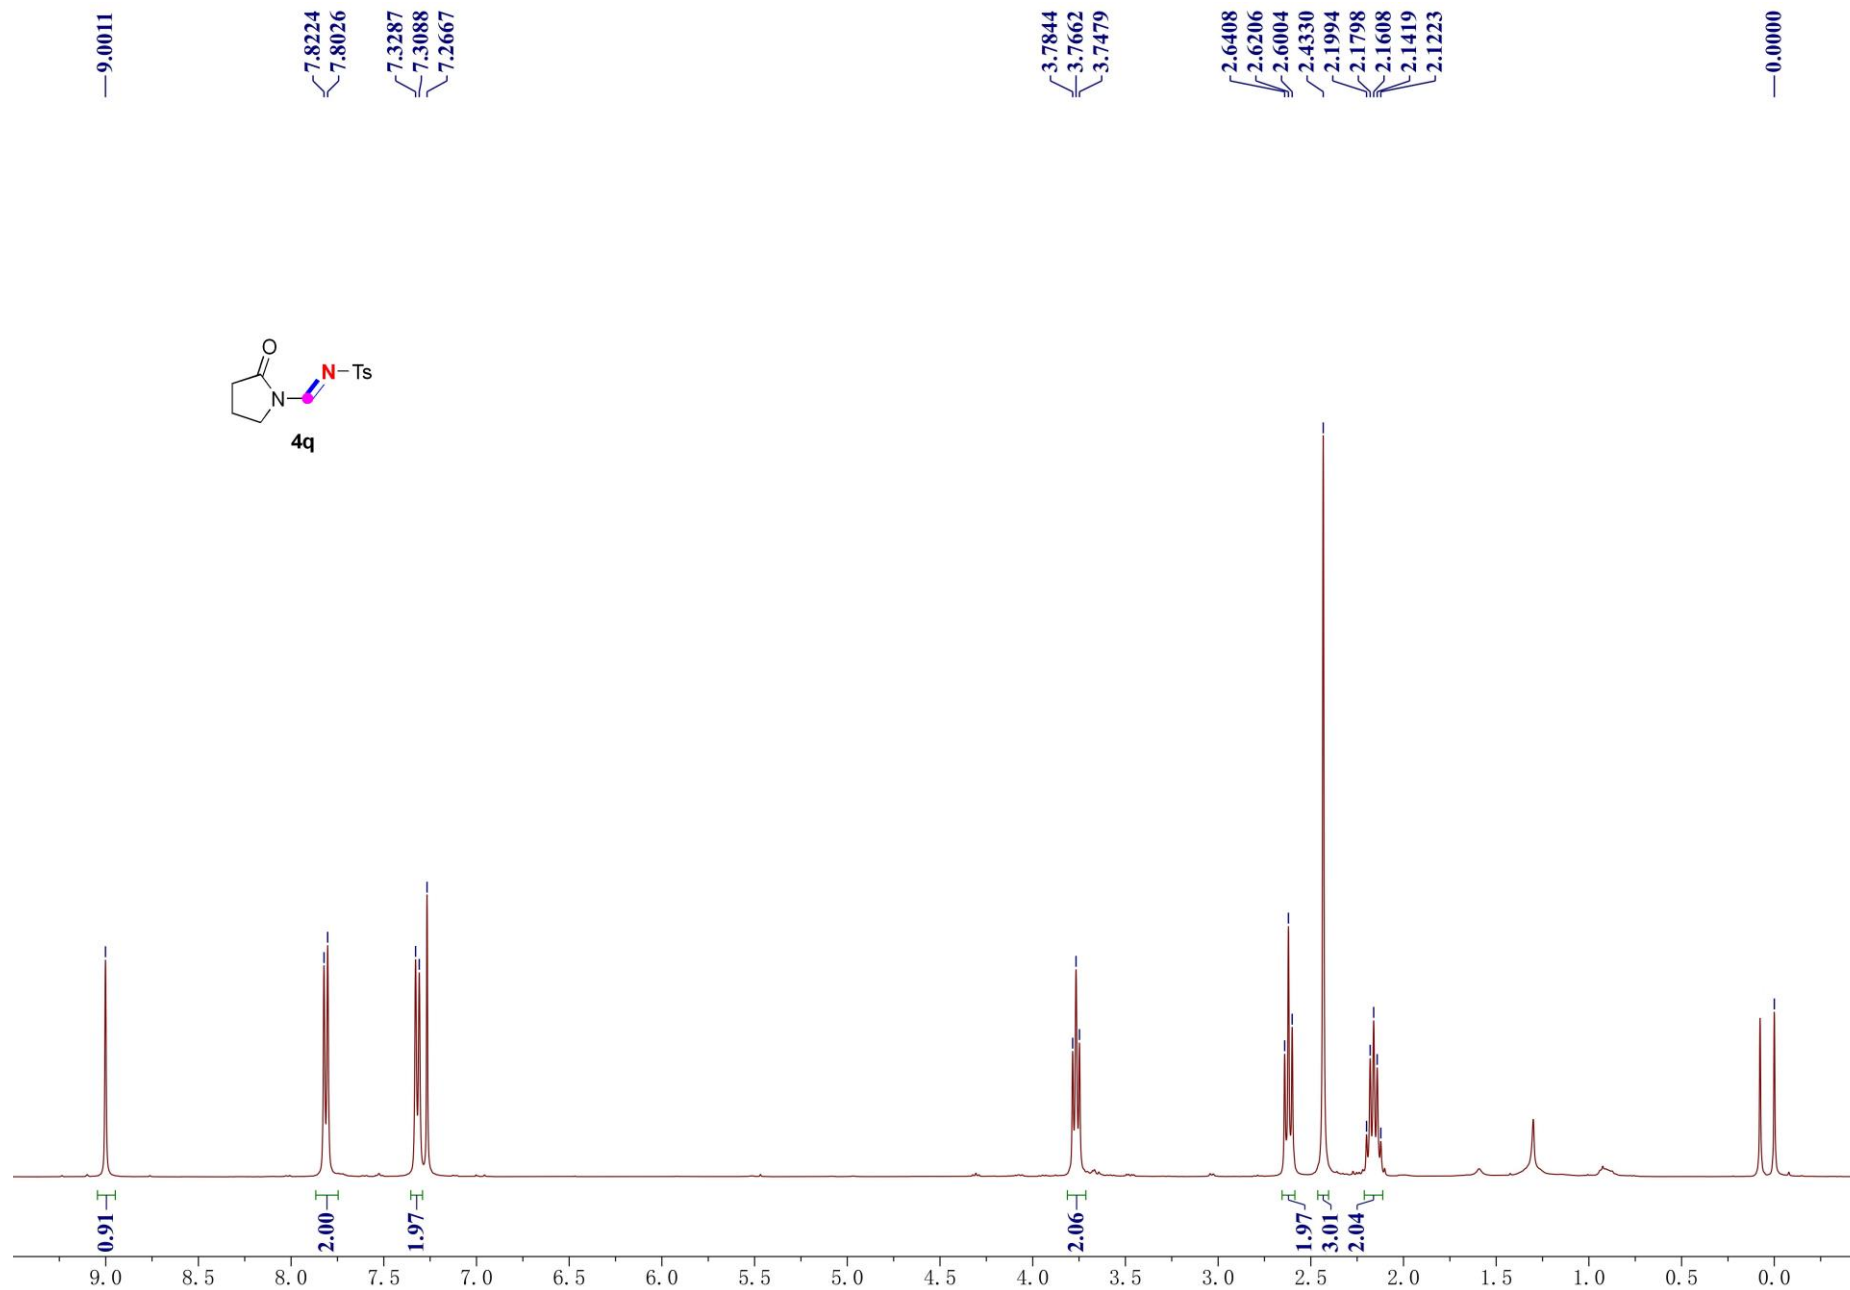

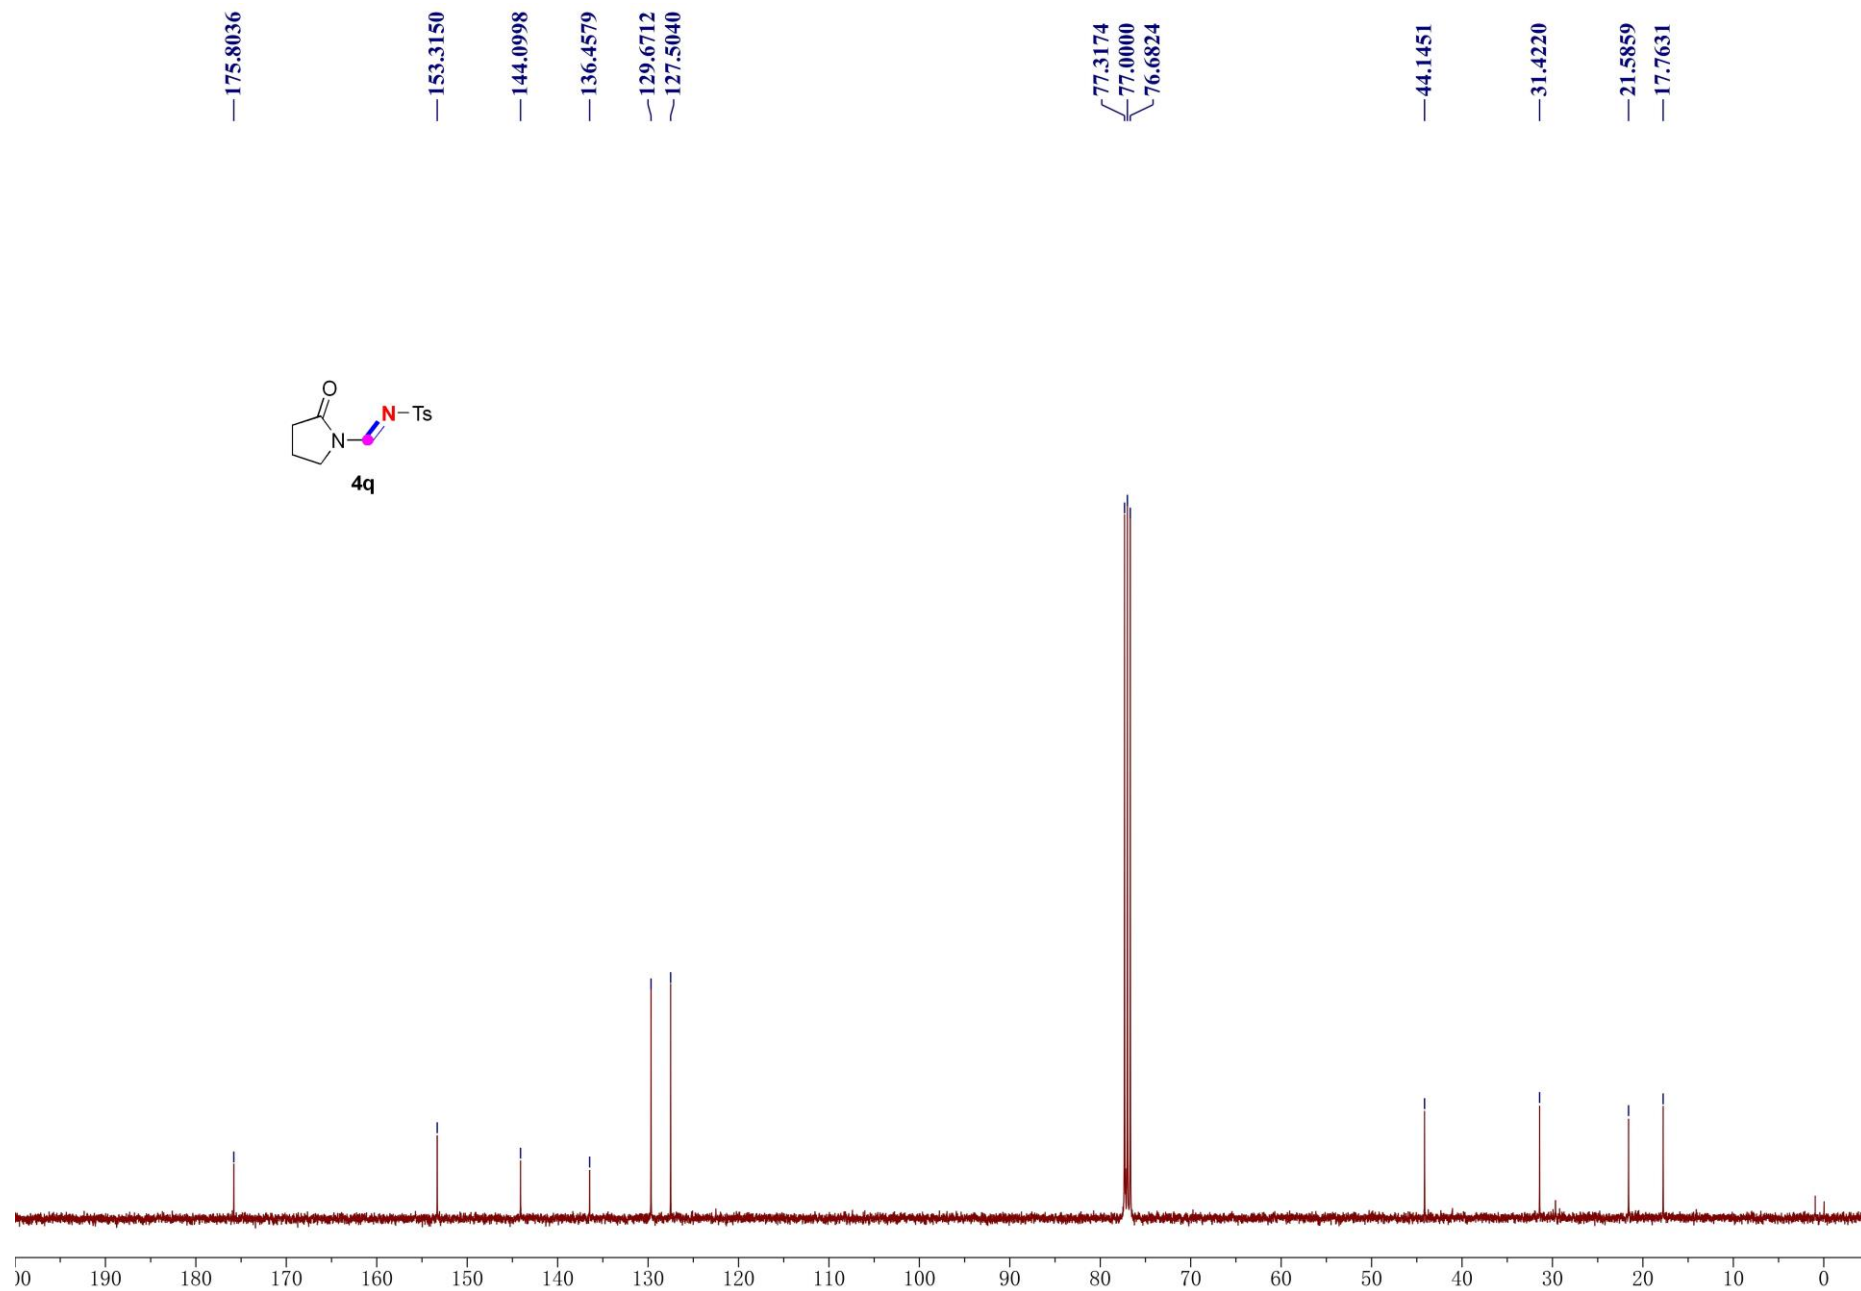

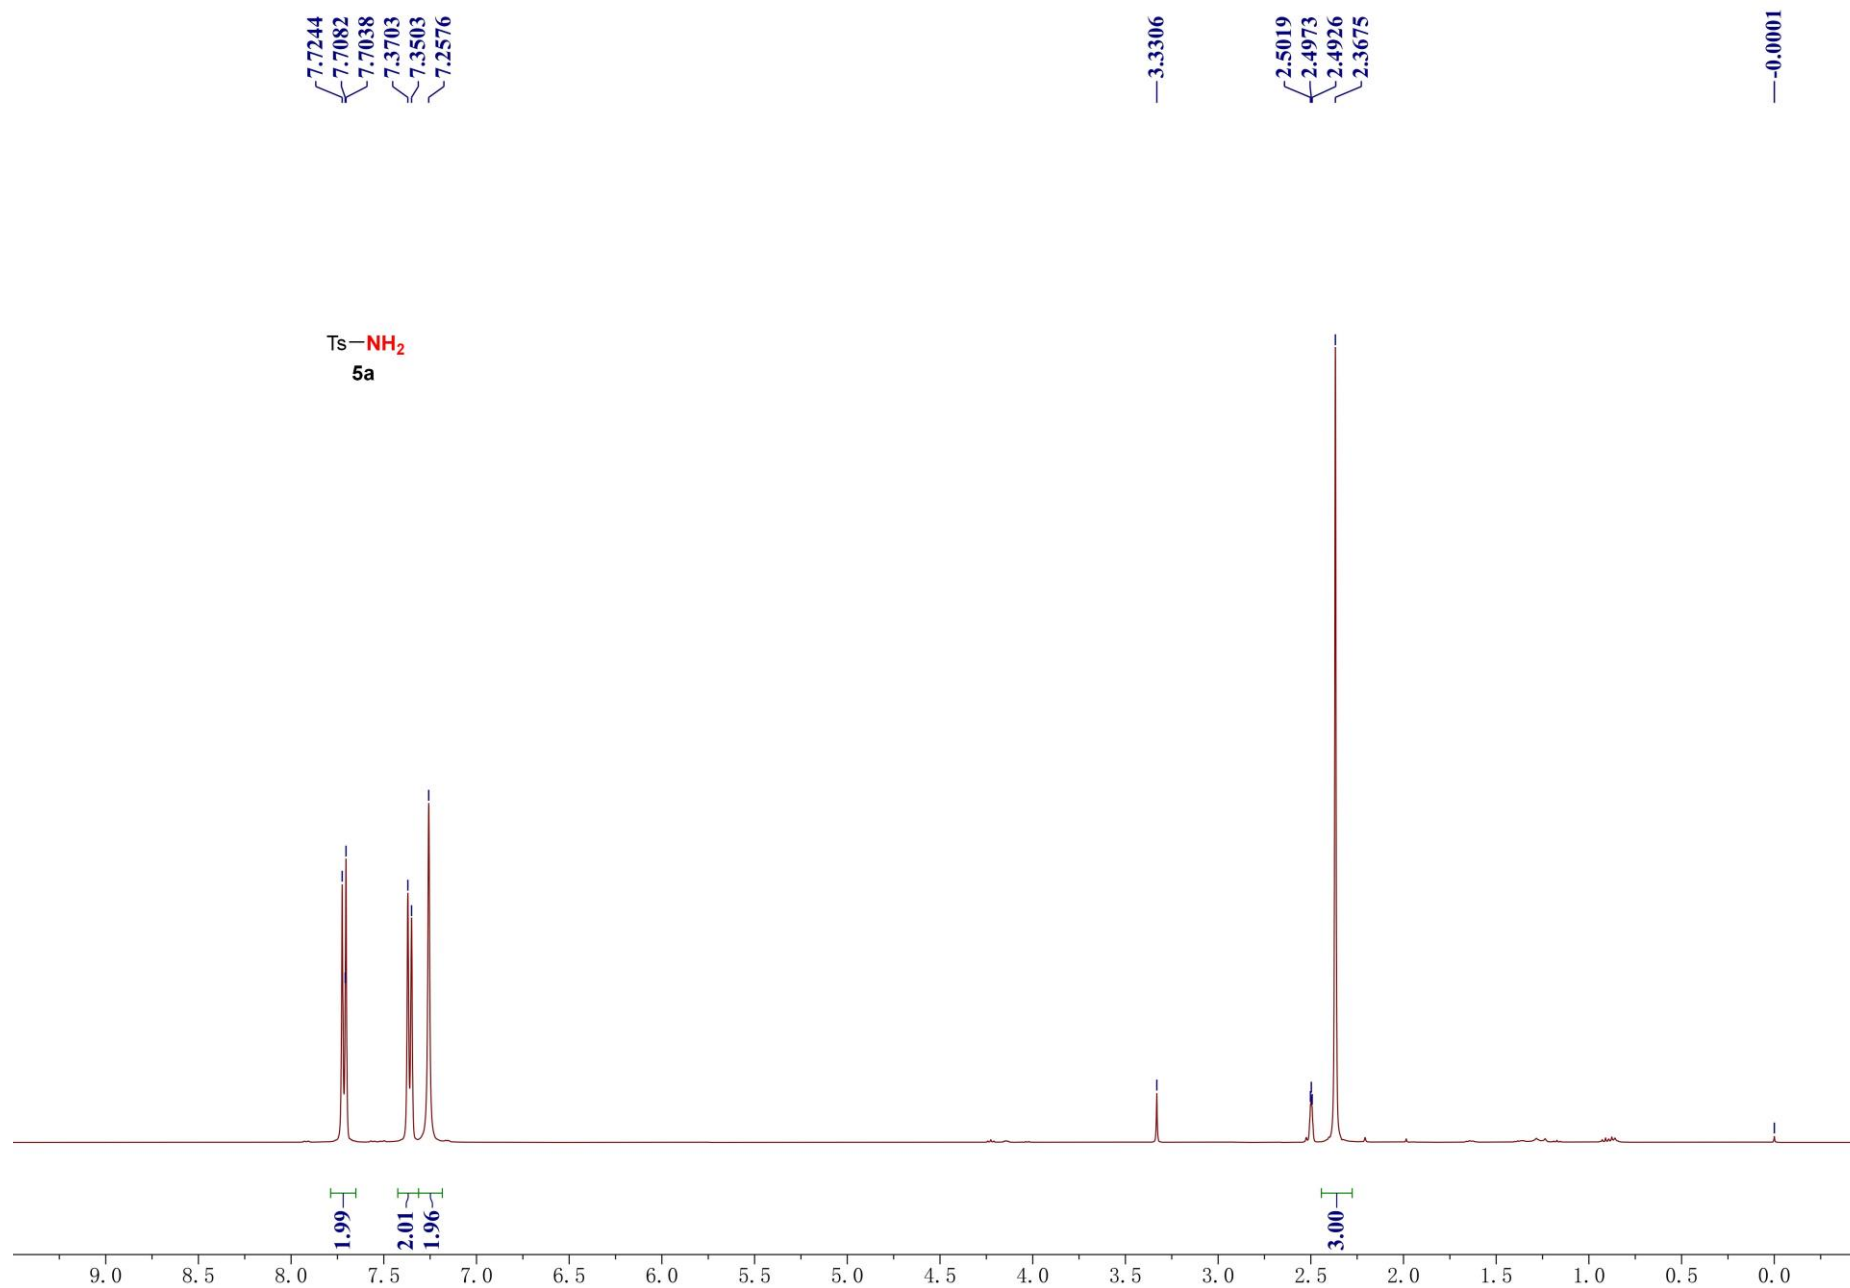

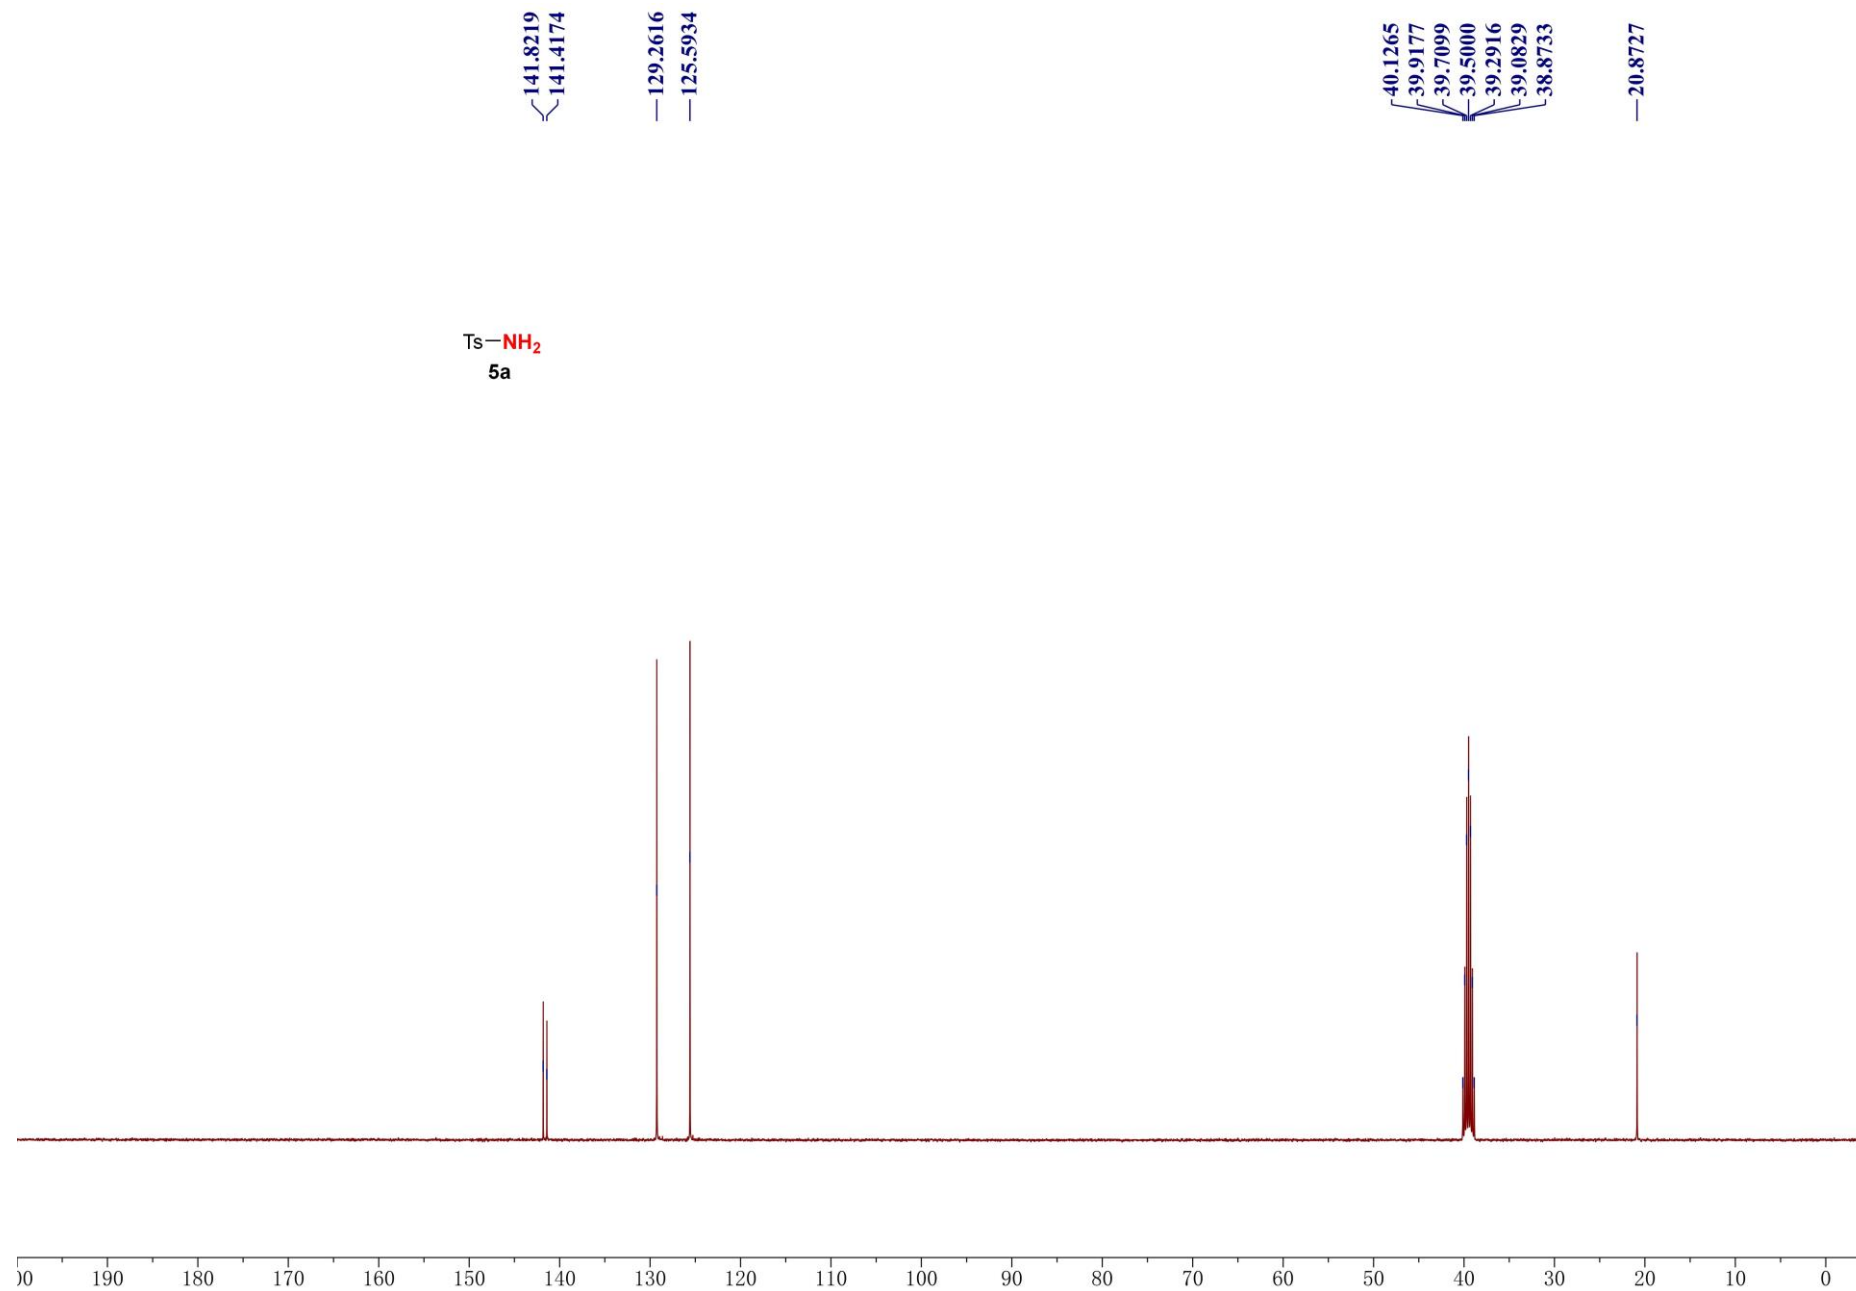

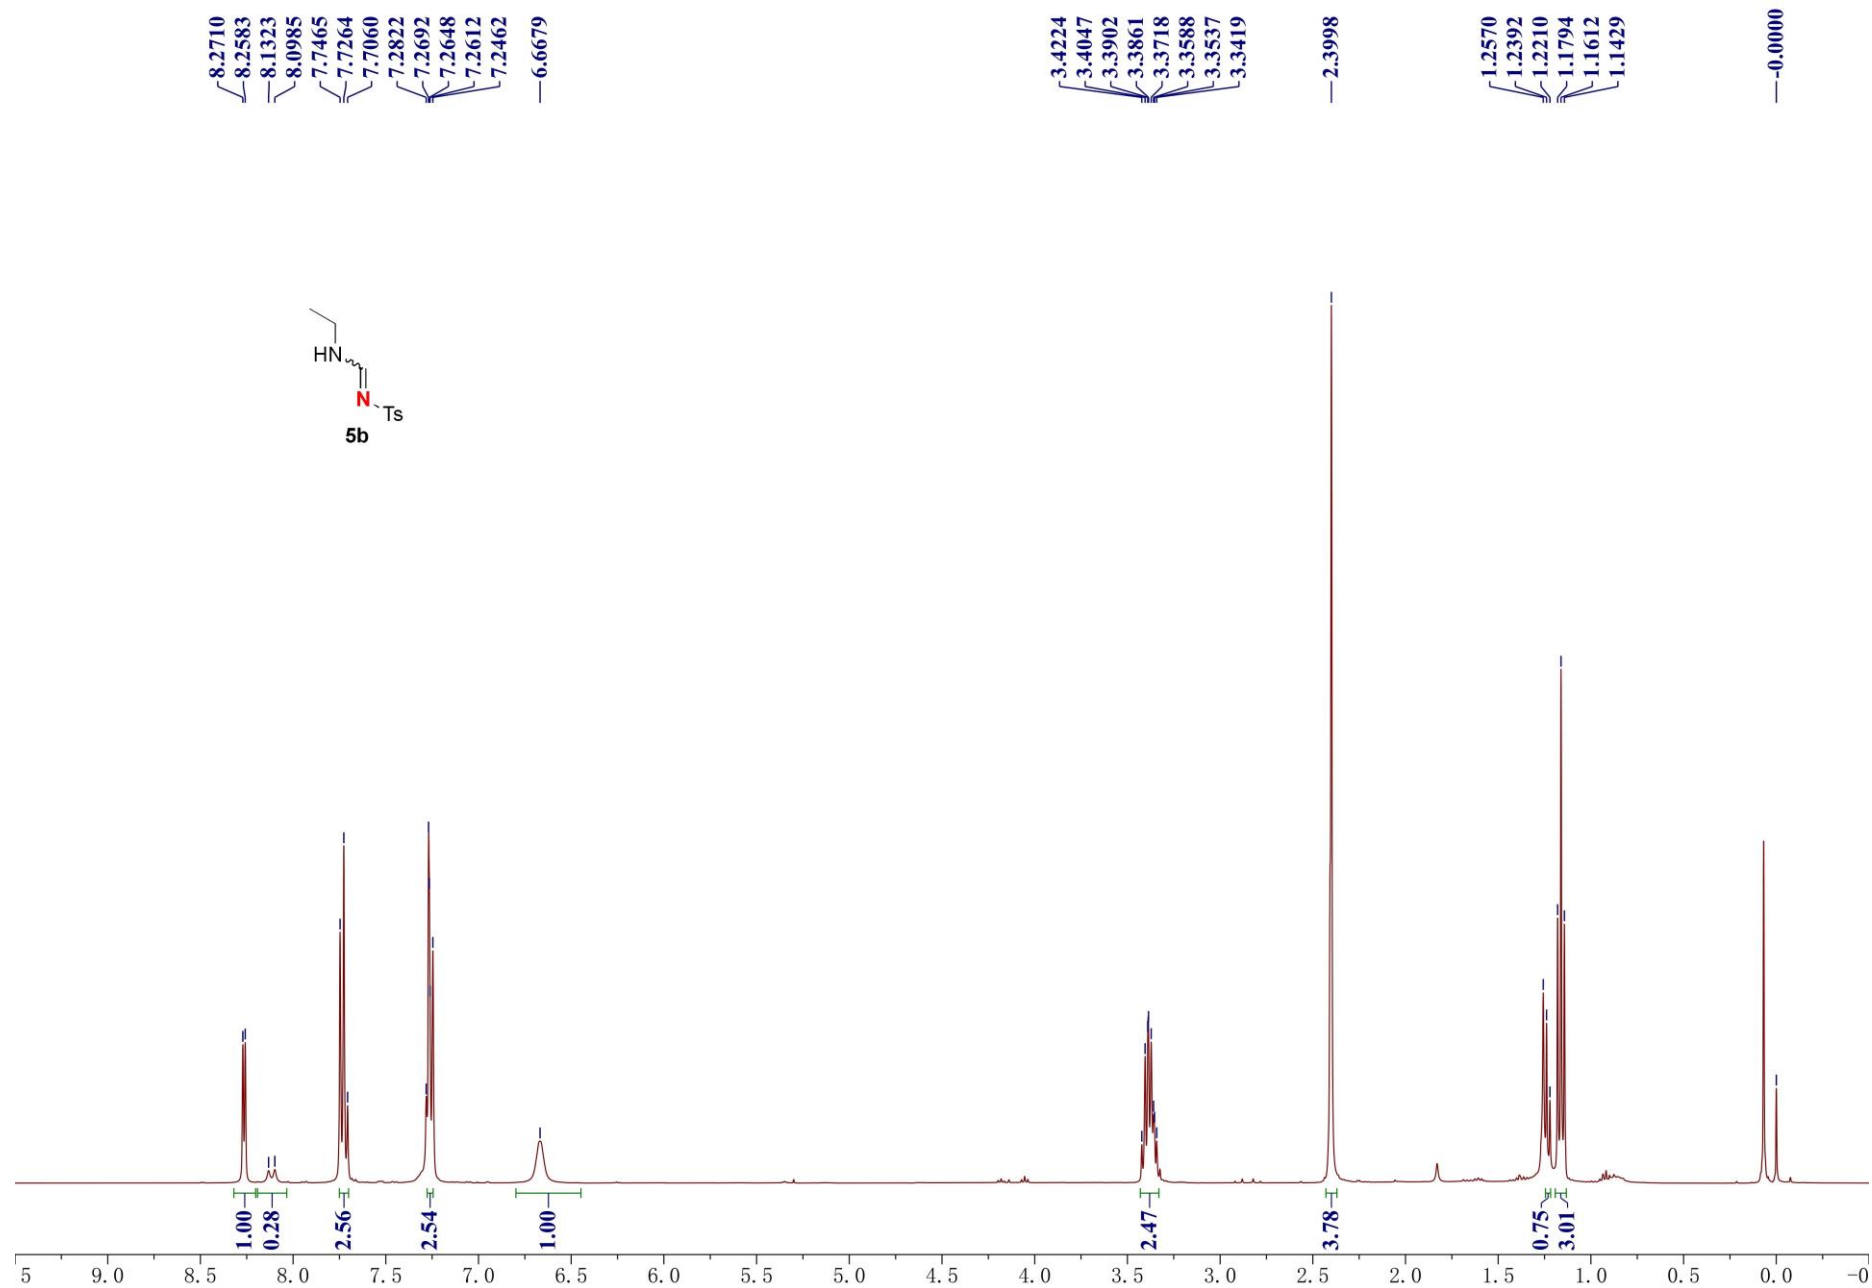

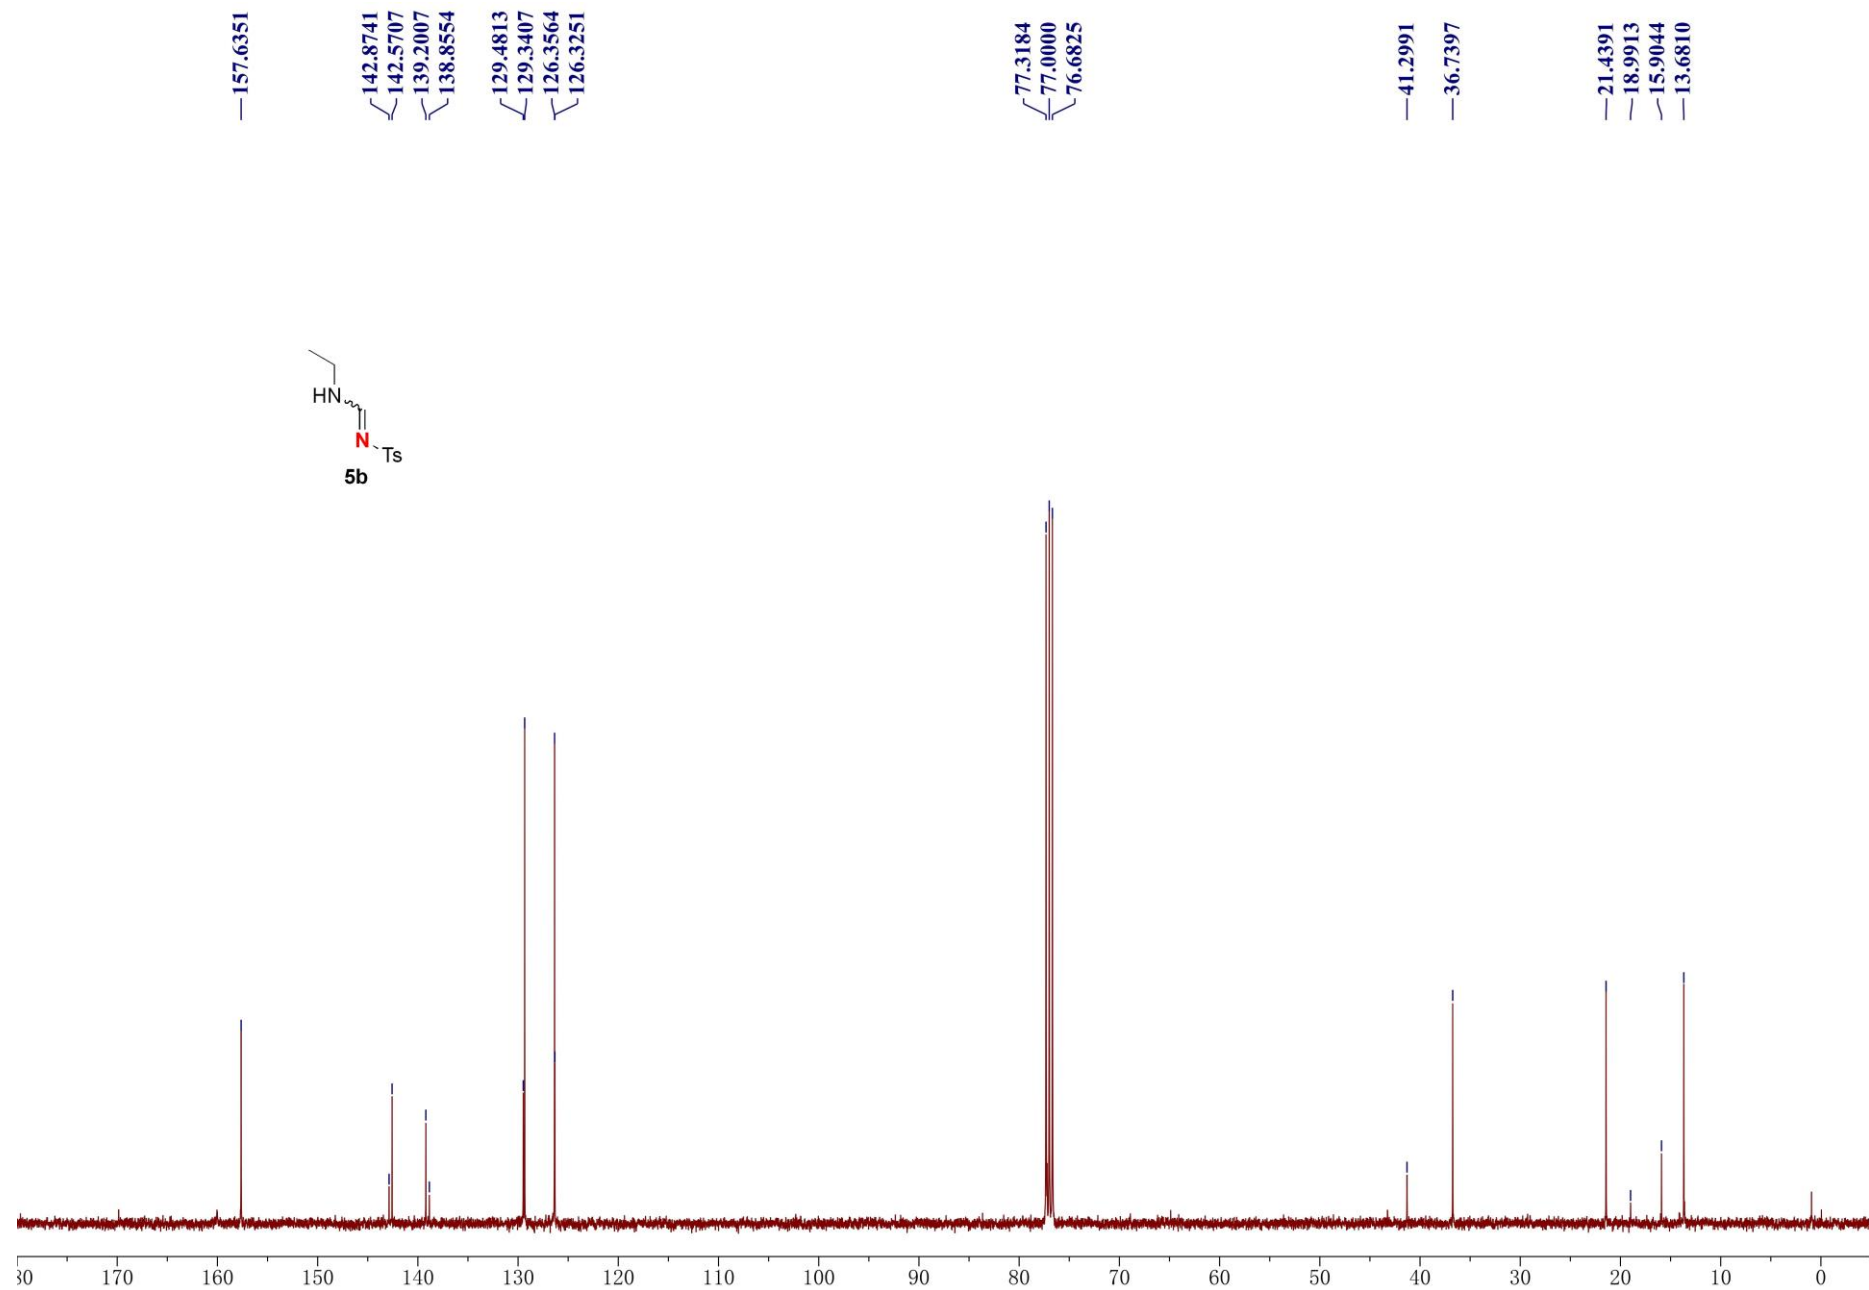

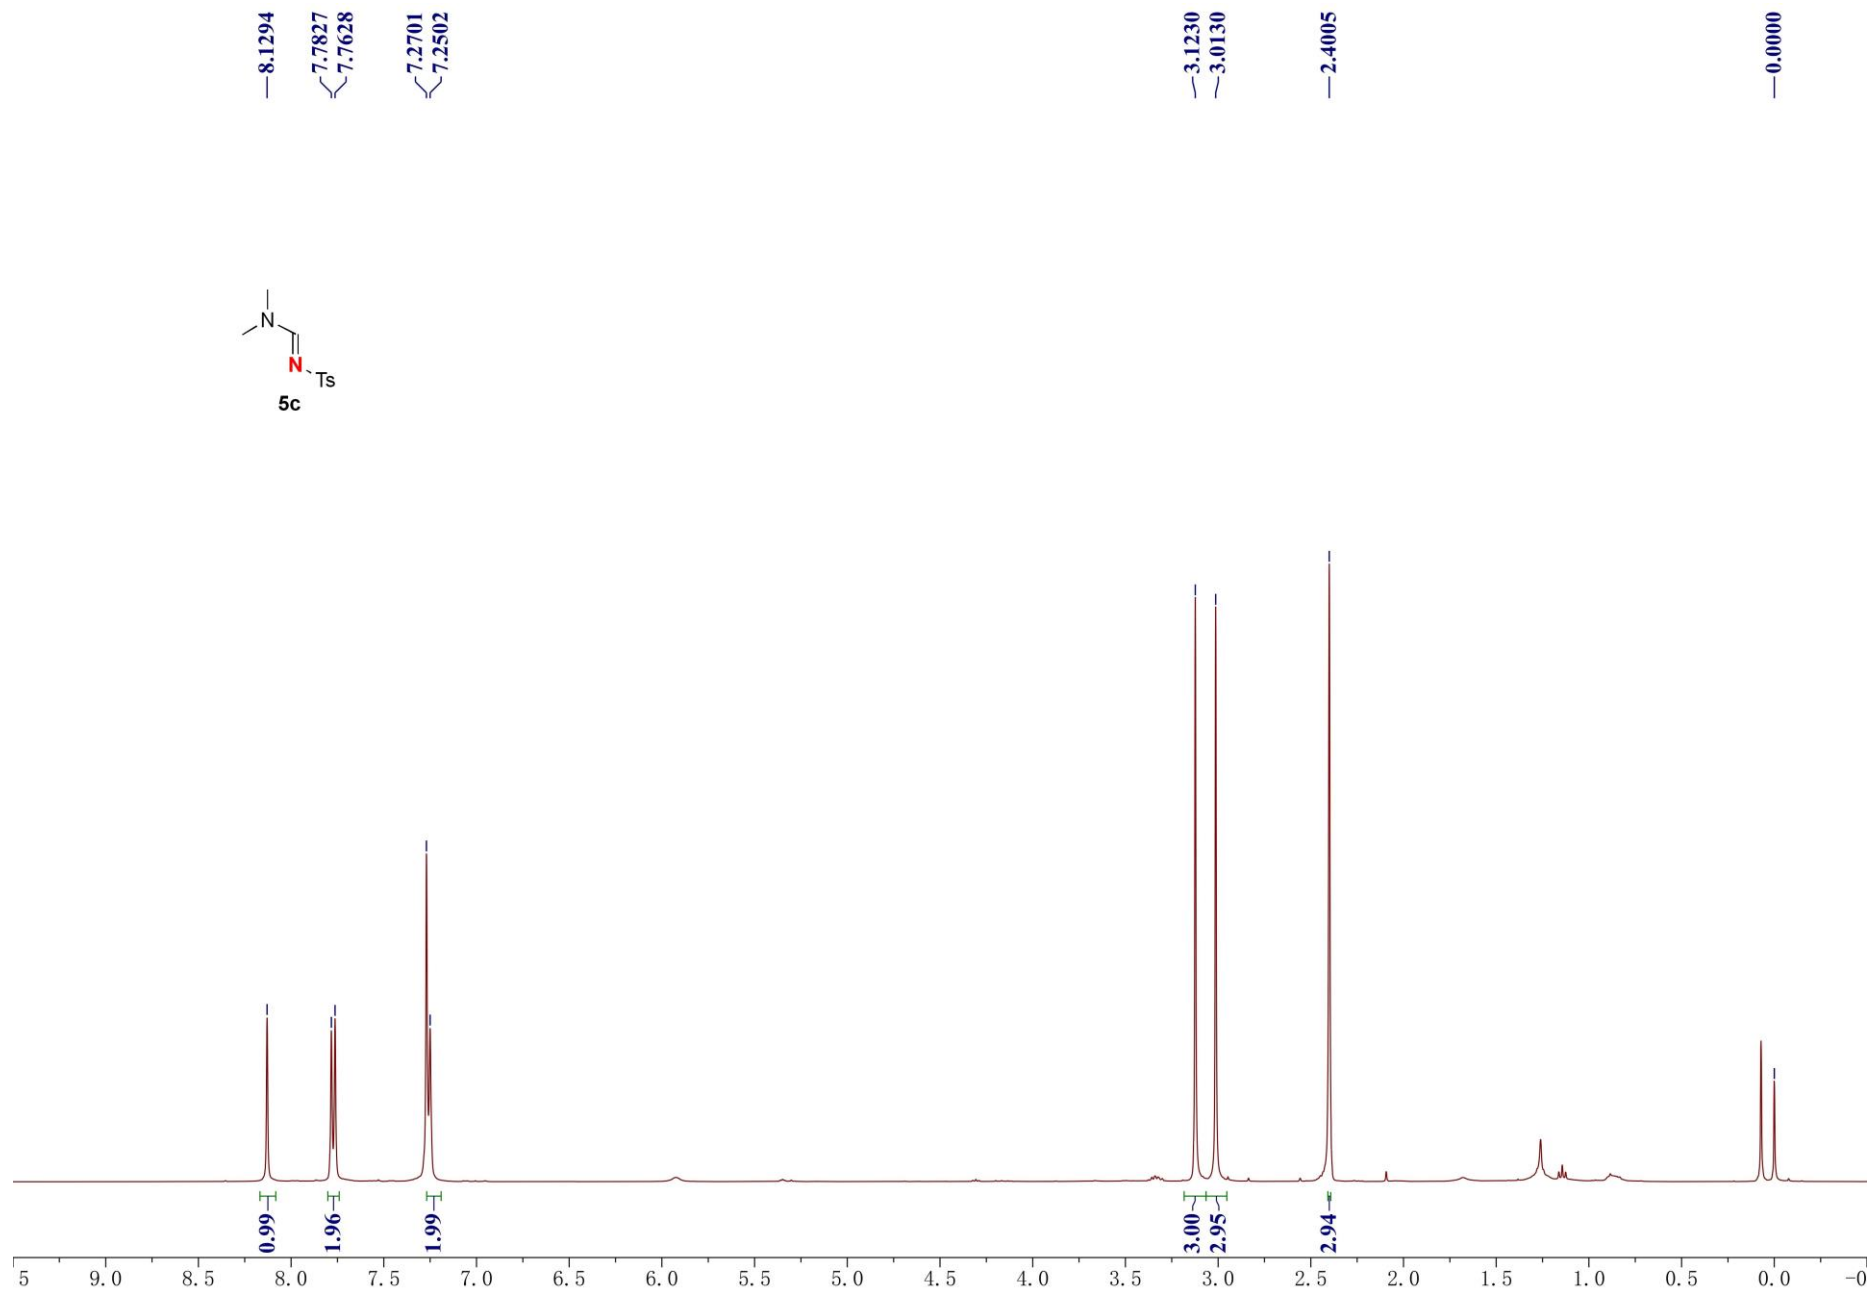

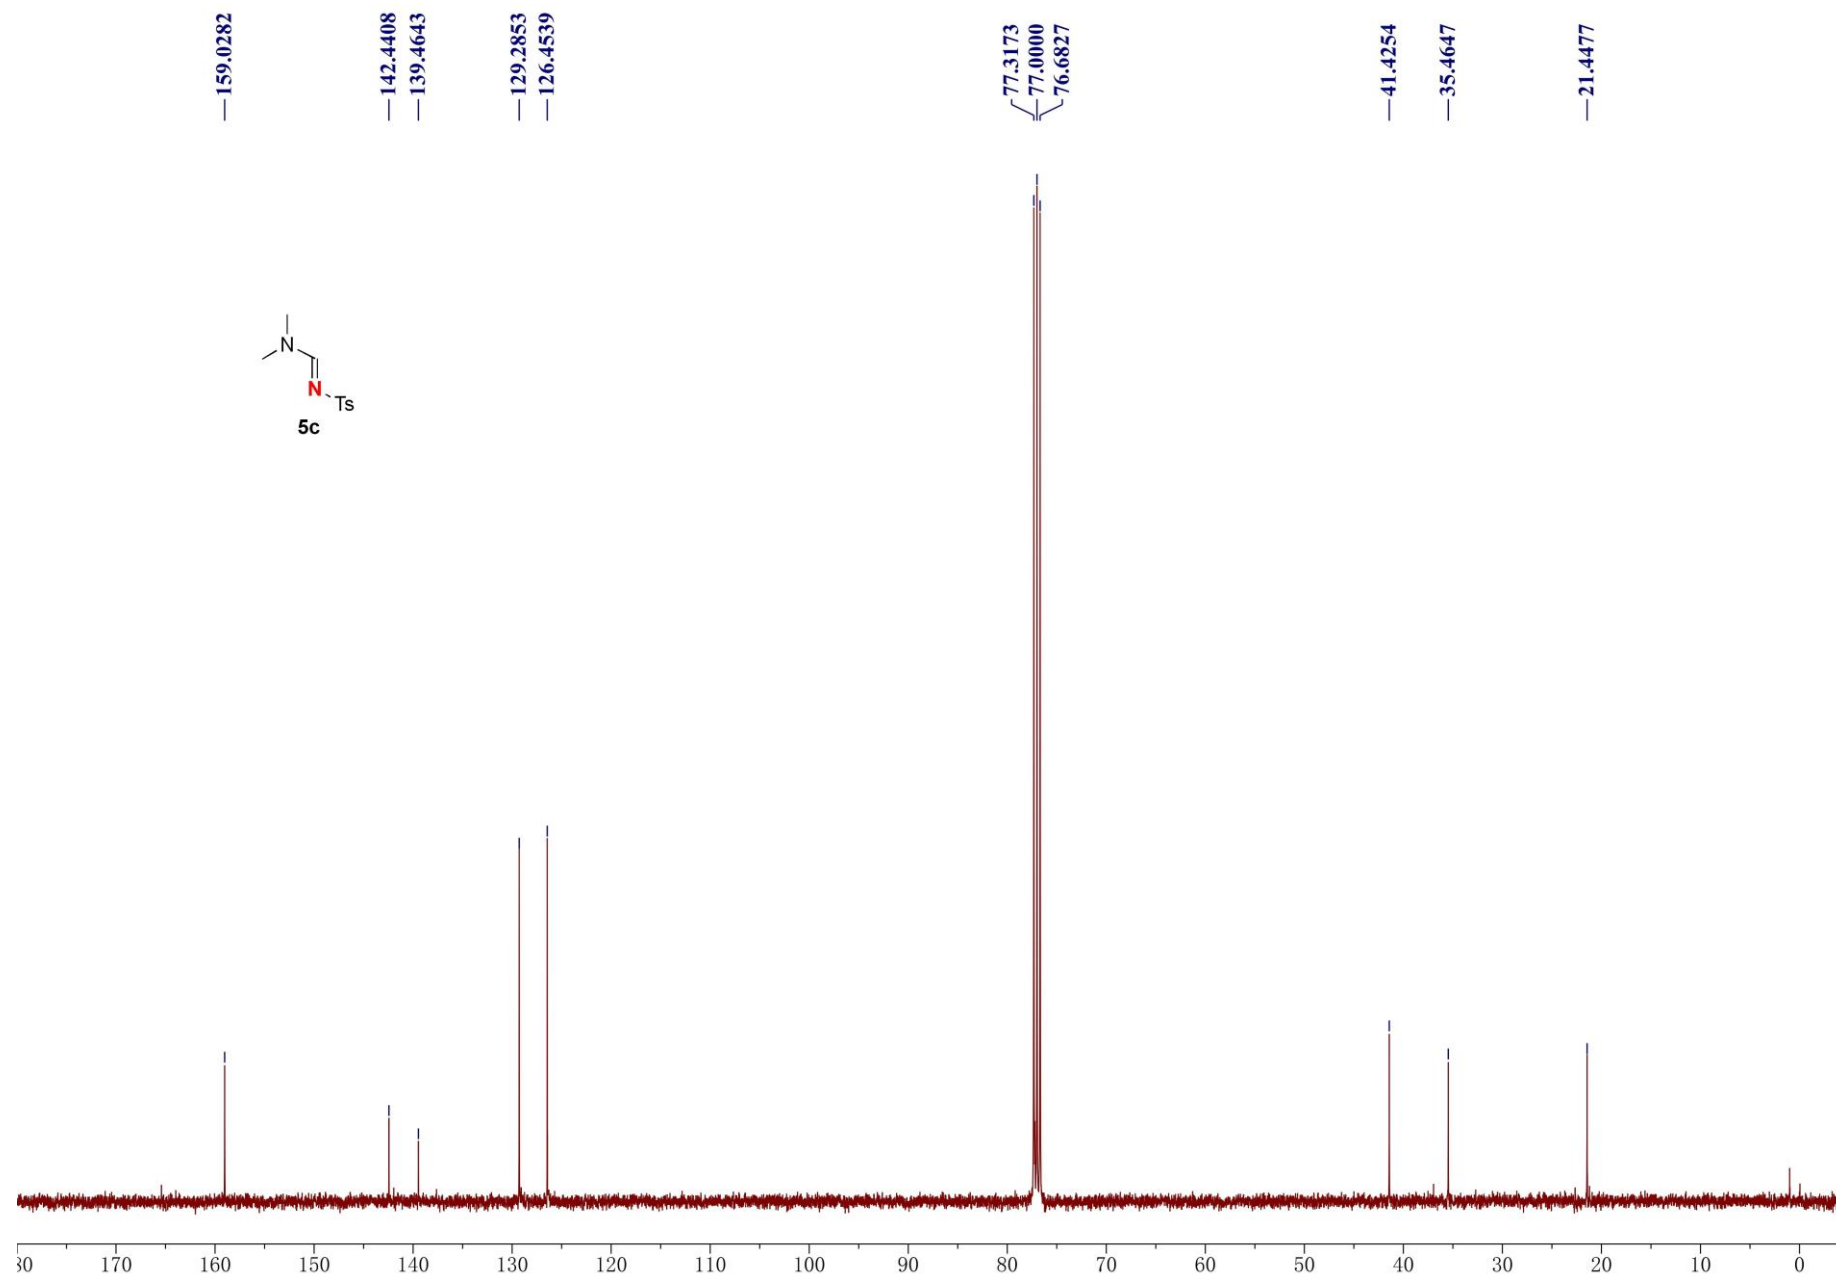

Supplement: d0ra10517a1.pdf [file d0ra10517a1.pdf]
